# Supplementary material for: Genetic Diversity and Population Structure of the Xanthomonas campestris pv. campestris Strains Affecting Cabbages in China Revealed by MLST and Rep-PCR Based Genotyping
Source: PubMed Central journal article supplement — Plant Pathol J. 2021 Oct 1;37(5):476–88. doi: 10.5423/PPJ.OA.06.2021.0088 (PMC8632610; doi:10.5423/ppj.oa.06.2021.0088), 2021-10-01
Supplement: PPJ-OA-06-2021-0088-suppl.pdf [file PPJ-OA-06-2021-0088-suppl.pdf]

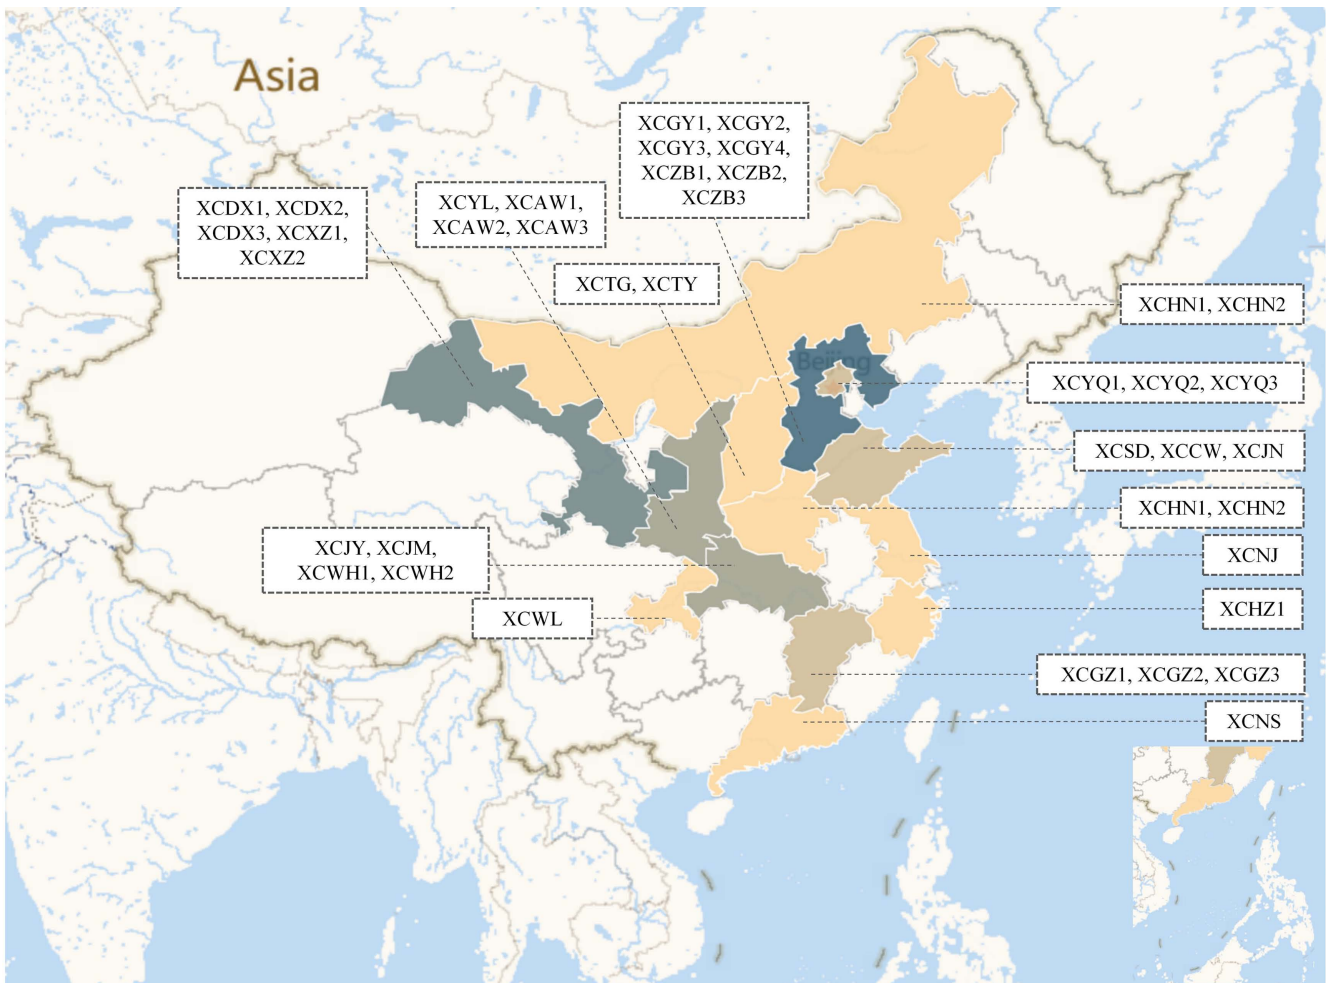

**Supplementary Fig. 1.** Distribution of 39 *Xanthomonas campestris* pv. *campestris* strains in China.

*atpD* (ATP synthase subunit beta)

>XCHZ1

GCGCTCGGCTCCACCGACGGATTGAAGCGCAACCTGCTGGCCACCAACACCGAGCGTGCGATT  
CGGTGCCGGTTGGCGCCGGGACGCTGGGCCGCATCATGGACGTGCTGGGTCGCCCGATCGACGA  
AGCCGGCGACGTGCAGGCCTCGGATCATTGGGAAATCCACCGCGCTGCGCCGTCGTACGAAGA  
CCAGTCGTCCAGCACCGAATTGCTGGAAACCGGCATCAAGGTGATCGACCTGATGTGCCCGTTC  
GCCAAGGGCGGCAAGGTCGGCCTGTTCCGGCGGCCGGCGTCCGGCAAGACCGTCAACATGATG  
GAACTGATCAACAACATCGCCAAGGCGCACTCGGGCCTGTCCGTGTTCCGCCGGCGTGGGTGAGC  
GTACCCGTGAGGGCAACGACTTCTACCACGAGATGAAGGACTCCAACGTCCTGGACAAGGTCG  
CGATGGTGTACGGCCAGATGAACGAGCCGCCGGGCAACCGTCTGCGCGTTGCGCTGACCGGCCT  
GACCATGGCCGAGTACTTCCGCGACGAGAAGGACGCCAGCGGCAAGGGCAAGGACGTGCTGCT  
GTTTCGTGGACAACATCTACCGCTACACGCTGGCCGGTACCGAAGTGTCCGCGCTGCTTGGCCGC  
ATGCCGTCGGCG

>XCNS

GCGCTCGGCTCCACCGACGGATTGAAGCGAAACCTGCTGGCCACCAACACCGAGCGTGCGATT  
TCGGTGCCGGTTGGCGCCGGGACGCTGGGCCGCATCATGGACGTGCTGGGTCGTCCGATCGACG  
AAGCCGGCGACGTGCAGGCCTCGGACCATTGGGAAATCCACCGCGCTGCGCCGTCGTACGAAG  
ACCAGTCGTCCAGCACCGAATTGCTGGAAACCGGCATCAAGGTGATCGACCTGATGTGCCCGTT  
CGCCAAGGGCGGCAAGGTCGGCCTGTTCCGGCGGCCGGCGTCCGGCAAGACCGTCAACATGAT  
GAACTGATCAACAACATCGCCAAGGCGCACTCGGGTCTGTCCGTGTTCCGCCGGCGTGGGTGAG  
CGTACCCGTGAGGGCAACGACTTCTACCACGAGATGAAGGACTCCAACGTCCTGGACAAGGTC  
GCGATGGTGTACGGCCAGATGAACGAGCCGCCGGGCAACCGTCTGCGCGTTGCGCTGACCGGC  
CTGACCATGGCCGAGTACTTCCGCGACGAGAAGGACGCCAGCGGCAAGGGCAAGGACGTGCTG  
CTGTTTCGTGGACAACATCTACCGCTACACGCTGGCCGGTACCGAAGTGTCCGCGCTGCTCGGCC  
GCATGCCGTCGGCG

>XCNJ

GCGCTCGGCTCCACCGACGGATTGAAGCGAAACCTGCTGGCCACCAACACCGAGCGTGCGATT  
TCGGTGCCGGTTGGCGCCGGGACGCTGGGCCGCATCATGGACGTGCTGGGTCGTCCGATCGACG  
AAGCCGGCGACGTGCAGGCCTCGGACCATTGGGAAATCCACCGCGCTGCGCCGTCGTACGAAG  
ACCAGTCGTCCAGCACCGAATTGCTGGAAACCGGCATCAAGGTGATCGACCTGATGTGCCCGTT  
CGCCAAGGGCGGCAAGGTCGGCCTGTTCCGGCGGCCGGCGTCCGGCAAGACCGTCAACATGAT  
GAACTGATCAACAACATCGCCAAGGCGCACTCGGGTCTGTCCGTGTTCCGCCGGCGTGGGTGAG  
CGTACCCGTGAGGGCAACGACTTCTACCACGAGATGAAGGACTCCAACGTCCTGGACAAGGTC  
GCGATGGTGTACGGCCAGATGAACGAGCCGCCGGGCAACCGTCTGCGCGTTGCGCTGACCGGC  
CTGACCATGGCCGAGTACTTCCGCGACGAGAAGGACGCCAGCGGCAAGGGCAAGGACGTGCTG  
CTGTTTCGTGGACAACATCTACCGCTACACGCTGGCCGGTACCGAAGTGTCCGCGCTGCTCGGCC  
GCATGCCGTCGGCG

>XCWL

GCGCTCGGCTCCACCGACGGATTGAAGCGCAACCTGCTGGCCACCAACACCGAGCGTGCGATT  
CGGTGCCGGTTGGCGCCGGGACGCTGGGCCGCATCATGGACGTGCTGGGTCGCCCGATCGACGA  
AGCCGGCGACGTGCAGGCCTCGGATCATTGGGAAATCCACCGCGCTGCGCCGTCGTACGAAGA  
CCAGTCGTCCAGCACCGAATTGCTGGAAACCGGCATCAAGGTGATCGACCTGATGTGCCCGTTC  
GCCAAGGGCGGCAAGGTCGGCCTGTTCCGGCGGCCGGCGTCCGGCAAGACCGTCAACATGATG  
GAACTGATCAACAACATCGCCAAGGCGCACTCGGGCCTGTCCGTGTTCCGCCGGCGTGGGTGAGC

GTACCCGTGAGGGCAACGACTTCTACCACGAGATGAAGGACTCCAACGTCCTGGACAAGGTCG  
CGATGGTGTACGGCCAGATGAACGAGCCGCCGGGCAACCGTCTGCGCGTTGCGCTGACCGGCCT  
GACCATGGCCGAGTACTTCCGCGACGAGAAGGACGCCAGCGGCAAGGGCAAGGACGTGCTGCT  
GTTTCGTGGACAACATCTACCGCTACACGCTGGCCGGTACCGAAGTGTCCGCGCTGCTTGGCCGC  
ATGCCGTCGGCG

>XCSD

GCGCTCGGCTCCACCGACGGATTGAAGCGCAACCTGCTGGCCACCAACACCGAGCGTGCGATTT  
CGGTGCCGTTGGCGCCGGGACGCTGGGCCGCATCATGGACGTGCTGGGTCGCCCCGATCGACGA  
AGCCGGCGACGTGCAGGCCTCGGATCATTGGGAAATCCACCGCGCTGCGCCGTCGTACGAAGA  
CCAGTCGTCCAGCACCGAATTGCTGGAAACCGGCATCAAGGTGATCGACCTGATGTGCCCGTTC  
GCCAAGGGCGGCAAGGTCGGCCTGTTCCGCGGCGCCGGCGTCCGGCAAGACCGTCAACATGATG  
GAACTGATCAACAACATCGCCAAGGCGCACTCGGGCCTGTCCGTGTTCCGCGCGTGGGTGAGC  
GTACCCGTGAGGGCAACGACTTCTACCACGAGATGAAGGACTCCAACGTCCTGGACAAGGTCG  
CGATGGTGTACGGCCAGATGAACGAGCCGCCGGGCAACCGTCTGCGCGTTGCGCTGACCGGCCT  
GACCATGGCCGAGTACTTCCGCGACGAGAAGGACGCCAGCGGCAAGGGCAAGGACGTGCTGCT  
GTTTCGTGGACAACATCTACCGCTACACGCTGGCCGGTACCGAAGTGTCCGCGCTGCTTGGCCGC  
ATGCCGTCGGCG

>XCJM

GCGCTCGGCTCCACCGACGGATTGAAGCGCAACCTGCTGGCCACCAACACCGAGCGTGCGATTT  
CGGTGCCGTTGGCGCCGGGACGCTGGGCCGCATCATGGACGTGCTGGGTCGCCCCGATCGACGA  
AGCCGGCGACGTGCAGGCCTCGGACCATTGGGAAATTCACCGCGCTGCGCCGTCGTACGAAGA  
CCAGTCGTCCAGCACCGAATTGCTGGAAACCGGCATCAAGGTGATCGACCTGATGTGCCCGTTC  
GCCAAGGGCGGCAAGGTCGGCCTGTTCCGCGGCGCCGGCGTCCGGCAAGACCGTCAACATGATG  
GAACTGATCAACAACATCGCCAAGGCGCACTCGGGTCTGTCCGTGTTCCGCGCGTGGGTGAGC  
GTACCCGTGAGGGCAACGACTTCTACCACGAGATGAAGGACTCCAACGTCCTGGACAAGGTCG  
CGATGGTGTACGGCCAGATGAACGAGCCGCCGGGCAACCGTCTGCGCGTTGCACTGACCGGCC  
TGACCATGGCCGAGTACTTCCGCGATGAGAAGGACGCCAGCGGCAAGGGCAAGGACGTGCTGT  
TGTTTCGTGGACAACATTTACCGCTACACGCTGGCCGGTACCGAAGTGTCCGCGCTGCTCGGCCG  
CATGCCGTCGGCG

>XCYL

GCGCTCGGCTCCACCGACGGATTGAAGCGCAACCTGCTGGCCACCAACACCGAGCGTGCGATTT  
CGGTGCCGTTGGCGCCGGGACGCTGGGCCGCATCATGGACGTGCTGGGTCGCCCCGATCGACGA  
AGCCGGCGACGTGCAGGCCTCGGATCATTGGGAAATCCACCGCGCTGCGCCGTCGTACGAAGA  
CCAGTCGTCCAGCACCGAATTGCTGGAAACCGGCATCAAGGTGATCGACCTGATGTGCCCGTTC  
GCCAAGGGCGGCAAGGTCGGCCTGTTCCGCGGCGCCGGCGTCCGGCAAGACCGTCAACATGATG  
GAACTGATCAACAACATCGCCAAGGCGCACTCGGGCCTGTCCGTGTTCCGCGCGTGGGTGAGC  
GTACCCGTGAGGGCAACGACTTCTACCACGAGATGAAGGACTCCAACGTCCTGGACAAGGTCG  
CGATGGTGTACGGCCAGATGAACGAGCCGCCGGGCAACCGTCTGCGCGTTGCGCTGACCGGCCT  
GACCATGGCCGAGTACTTCCGCGACGAGAAGGACGCCAGCGGCAAGGGCAAGGACGTGCTGCT  
GTTTCGTGGACAACATCTACCGCTACACGCTGGCCGGTACCGAAGTGTCCGCGCTGCTTGGCCGC  
ATGCCGTCGGCG

>XCBS

GCGCTCGGCTCCACCGACGGATTGAAGCGCAACCTGCTGGCCACCAACACCGAGCGTGCGATTT  
CGGTGCCGTTGGCGCCGGGACGCTGGGCCGCATCATGGACGTGCTGGGTCGCCCCGATCGACGA

AGCCGGCGACGTGCAGGCCTCGGATCATTGGGAAATCCACCGCGCTGCGCCGTCGTACGAAGA  
CCAGTCGTCCAGCACCGAATTGCTGGAAACCGGCATCAAGGTGATCGACCTGATGTGCCCGTTC  
GCCAAGGGCGGCAAGGTCGGCCTGTTCCGGCGGCCGGCGTCGGCAAGACCGTCAACATGATG  
GAACTGATCAACAACATCGCCAAGGCGCACTCGGGCCTGTCCGTGTTCCGGCGCTGGGTGAGC  
GTACCCGTGAGGGCAACGACTTCTACCACGAGATGAAGGACTCCAACGTCCTGGACAAGGTCG  
CGATGGTGTACGGCCAGATGAACGAGCCGCCGGGCAACCGTCTGCGCGTTGCGCTGACCGGCCT  
GACCATGGCCGAGTACTTCCGCGACGAGAAGGACGCCAGCGGCAAGGGCAAGGACGTGCTGCT  
GTTTCGTGGACAACATCTACCGCTACACGCTGGCCGGTACCGAAGTGTCCGCGCTGCTTGGCCGC  
ATGCCGTCGGCG

>XCJN

GCGCTCGGCTCCACCGACGGATTGAAGCGCAACCTGCTGGCCACCAACACCGAGCGTGCGATTT  
CGGTGCCGTTGGCGCCGGGACGCTGGGCCGCATCATGGACGTGCTGGGTCGCCCCGATCGACGA  
AGCCGGCGACGTGCAGGCCTCGGATCATTGGGAAATCCACCGCGCTGCGCCGTCGTACGAAGA  
CCAGTCGTCCAGCACCGAATTGCTGGAAACCGGCATCAAGGTGATCGACCTGATGTGCCCGTTC  
GCCAAGGGCGGCAAGGTCGGCCTGTTCCGGCGGCCGGCGTCGGCAAGACCGTCAACATGATG  
GAACTGATCAACAACATCGCCAAGGCGCACTCGGGCCTGTCCGTGTTCCGGCGCTGGGTGAGC  
GTACCCGTGAGGGCAACGACTTCTACCACGAGATGAAGGACTCCAACGTCCTGGACAAGGTCG  
CGATGGTGTACGGCCAGATGAACGAGCCGCCGGGCAACCGTCTGCGCGTTGCGCTGACCGGCCT  
GACCATGGCCGAGTACTTCCGCGACGAGAAGGACGCCAGCGGCAAGGGCAAGGACGTGCTGCT  
GTTTCGTGGACAACATCTACCGCTACACGCTGGCCGGTACCGAAGTGTCCGCGCTGCTTGGCCGC  
ATGCCGTCGGCG

>XCCW

GCGCTCGGCTCCACCGACGGATTGAAGCGCAACCTGCTGGCCACCAACACCGAGCGTGCGATTT  
CGGTGCCGTTGGCGCCGGGACGCTGGGCCGCATCATGGACGTGCTGGGTCGCCCCGATCGACGA  
AGCCGGCGACGTGCAGGCCTCGGATCATTGGGAAATCCACCGCGCTGCGCCGTCGTACGAAGA  
CCAGTCGTCCAGCACCGAATTGCTGGAAACCGGCATCAAGGTGATCGACCTGATGTGCCCGTTC  
GCCAAGGGCGGCAAGGTCGGCCTGTTCCGGCGGCCGGCGTCGGCAAGACCGTCAACATGATG  
GAACTGATCAACAACATCGCCAAGGCGCACTCGGGCCTGTCCGTGTTCCGGCGCTGGGTGAGC  
GTACCCGTGAGGGCAACGACTTCTACCACGAGATGAAGGACTCCAACGTCCTGGACAAGGTCG  
CGATGGTGTACGGCCAGATGAACGAGCCGCCGGGCAACCGTCTGCGCGTTGCGCTGACCGGCCT  
GACCATGGCCGAGTACTTCCGCGACGAGAAGGACGCCAGCGGCAAGGGCAAGGACGTGCTGCT  
GTTTCGTGGACAACATCTACCGCTACACGCTGGCCGGTACCGAAGTGTCCGCGCTGCTTGGCCGC  
ATGCCGTCGGCG

>XCWH1

GCGCTCGGCTCCACCGACGGATTGAAGCGCAACCTGCTGGCCACCAACACCGAGCGTGCGATTT  
CGGTGCCGTTGGCGCCGGGACGCTGGGCCGCATCATGGACGTGCTGGGTCGCCCCGATCGACGA  
AGCCGGCGACGTGCAGGCCTCGGATCATTGGGAAATCCACCGCGCTGCGCCGTCGTACGAAGA  
CCAGTCGTCCAGCACCGAATTGCTGGAAACCGGCATCAAGGTGATCGACCTGATGTGCCCGTTC  
GCCAAGGGCGGCAAGGTCGGCCTGTTCCGGCGGCCGGCGTCGGCAAGACCGTCAACATGATG  
GAACTGATCAACAACATCGCCAAGGCGCACTCGGGCCTGTCCGTGTTCCGGCGCTGGGTGAGC  
GTACCCGTGAGGGCAACGACTTCTACCACGAGATGAAGGACTCCAACGTCCTGGACAAGGTCG  
CGATGGTGTACGGCCAGATGAACGAGCCGCCGGGCAACCGTCTGCGCGTTGCGCTGACCGGCCT  
GACCATGGCCGAGTACTTCCGCGACGAGAAGGACGCCAGCGGCAAGGGCAAGGACGTGCTGCT  
GTTTCGTGGACAACATCTACCGCTACACGCTGGCCGGTACCGAAGTGTCCGCGCTGCTTGGCCGC

ATGCCGTCGGCG

>XCWH2

GCGCTCGGCTCCACCGACGGATTGAAGCGCAACCTGCTGGCCACCAACACCGAGCGTGCGATT  
CGGTGCCGTTGGCGCCGGGACGCTGGGCCGCATCATGGACGTGCTGGGTCGCCCGATCGACGA  
AGCCGGCGACGTGCAGGCCTCGGATCATTGGGAAATCCACCGCGCTGCGCCGTCGTACGAAGA  
CCAGTCGTCCAGCACCGAATTGCTGGAAACCGGCATCAAGGTGATCGACCTGATGTGCCCGTTC  
GCCAAGGGCGGCAAGGTCGGCCTGTTCCGGCGGCCGGCGTCCGGCAAGACCGTCAACATGATG  
GAACTGATCAACAACATCGCCAAGGCGCACTCGGCCCTGTCCGTGTTCCGCCGGCGTGGGTGAGC  
GTACCCGTGAGGGCAACGACTTCTACCACGAGATGAAGGACTCCAACGTCCTGGACAAGGTCG  
CGATGGTGTACGGCCAGATGAACGAGCCGCCGGGCAACCGTCTGCGCGTTGCGCTGACCGGCCT  
GACCATGGCCGAGTACTTCCGCGACGAGAAGGACGCCAGCGGCAAGGGCAAGGACGTGCTGCT  
GTTTCGTGGACAACATCTACCGCTACACGCTGGCCGGTACCGAAGTGTCCGCGCTGCTTGGCCGC  
ATGCCGTCGGCG

>XCDX1

GCGCTCGGCTCCACCGACGGATTGAAGCGCAACCTGCTGGCCACCAACACCGAGCGTGCGATT  
CGGTGCCGTTGGCGCCGGGACGCTGGGCCGCATCATGGACGTGCTGGGTCGCCCGATCGACGA  
AGCCGGCGACGTGCAGGCCTCGGATCATTGGGAAATCCACCGCGCTGCGCCGTCGTACGAAGA  
CCAGTCGTCCAGCACCGAATTGCTGGAAACCGGCATCAAGGTGATCGACCTGATGTGCCCGTTC  
GCCAAGGGCGGCAAGGTCGGCCTGTTCCGGCGGCCGGCGTCCGGCAAGACCGTCAACATGATG  
GAACTGATCAACAACATCGCCAAGGCGCACTCGGCCCTGTCCGTGTTCCGCCGGCGTGGGTGAGC  
GTACCCGTGAGGGCAACGACTTCTACCACGAGATGAAGGACTCCAACGTCCTGGACAAGGTCG  
CGATGGTGTACGGCCAGATGAACGAGCCGCCGGGCAACCGTCTGCGCGTTGCGCTGACCGGCCT  
GACCATGGCCGAGTACTTCCGCGACGAGAAGGACGCCAGCGGCAAGGGCAAGGACGTGCTGCT  
GTTTCGTGGACAACATCTACCGCTACACGCTGGCCGGTACCGAAGTGTCCGCGCTGCTTGGCCGC  
ATGCCGTCGGCG

>XCDX2

GCGCTCGGCTCCACCGACGGATTGAAGCGCAACCTGCTGGCCACCAACACCGAGCGTGCGATT  
CGGTGCCGTTGGCGCCGGGACGCTGGGCCGCATCATGGACGTGCTGGGTCGCCCGATCGACGA  
AGCCGGCGACGTGCAGGCCTCGGATCATTGGGAAATCCACCGCGCTGCGCCGTCGTACGAAGA  
CCAGTCGTCCAGCACCGAATTGCTGGAAACCGGCATCAAGGTGATCGACCTGATGTGCCCGTTC  
GCCAAGGGCGGCAAGGTCGGCCTGTTCCGGCGGCCGGCGTCCGGCAAGACCGTCAACATGATG  
GAACTGATCAACAACATCGCCAAGGCGCACTCGGCCCTGTCCGTGTTCCGCCGGCGTGGGTGAGC  
GTACCCGTGAGGGCAACGACTTCTACCACGAGATGAAGGACTCCAACGTCCTGGACAAGGTCG  
CGATGGTGTACGGCCAGATGAACGAGCCGCCGGGCAACCGTCTGCGCGTTGCGCTGACCGGCCT  
GACCATGGCCGAGTACTTCCGCGACGAGAAGGACGCCAGCGGCAAGGGCAAGGACGTGCTGCT  
GTTTCGTGGACAACATCTACCGCTACACGCTGGCCGGTACCGAAGTGTCCGCGCTGCTTGGCCGC  
ATGCCGTCGGCG

>XCDX3

GCGCTCGGCTCCACCGACGGATTGAAGCGCAACCTGCTGGCCACCAACACCGAGCGTGCGATT  
CGGTGCCGTTGGCGCCGGGACGCTGGGCCGCATCATGGACGTGCTGGGTCGCCCGATCGACGA  
AGCCGGCGACGTGCAGGCCTCGGATCATTGGGAAATCCACCGCGCTGCGCCGTCGTACGAAGA  
CCAGTCGTCCAGCACCGAATTGCTGGAAACCGGCATCAAGGTGATCGACCTGATGTGCCCGTTC  
GCCAAGGGCGGCAAGGTCGGCCTGTTCCGGCGGCCGGCGTCCGGCAAGACCGTCAACATGATG  
GAACTGATCAACAACATCGCCAAGGCGCACTCGGCCCTGTCCGTGTTCCGCCGGCGTGGGTGAGC

GTACCCGTGAGGGCAACGACTTCTACCACGAGATGAAGGACTCCAACGTCCTGGACAAGGTCG  
CGATGGTGTACGGCCAGATGAACGAGCCGCCGGGCAACCGTCTGCGCGTTGCGCTGACCGGCCT  
GACCATGGCCGAGTACTTCCGCGACGAGAAGGACGCCAGCGGCAAGGGCAAGGACGTGCTGCT  
GTTCTGTGACAACATCTACCGCTACACGCTGGCCGGTACCGAAGTGTCCGCGCTGCTTGGCCG  
ATGCCGTCGGCG

>XCTG

GCGCTCGGCTCCACCGACGGATTGAAGCGAAACCTGCTGGCCACCAACACCGAGCGTGCGATT  
TCGGTGCCGGTTGGCGCCGGGACGCTGGGCCGCATCATGGACGTGCTGGGTCGTCCGATCGACG  
AAGCCGGCGACGTGCAGGCCTCGGACCATTGGGAAATCCACCGCGCTGCGCCGTCGTACGAAG  
ACCAGTCGTCCAGCACCGAATTGCTGGAAACCGGCATCAAGGTGATCGACCTGATGTGCCCGTT  
CGCAAGGGCGGCAAGGTCGGCCTGTTCCGCGCGCCGGCGTCGGCAAGACCGTCAACATGAT  
GGAAGTATCAACAACATCGCAAGGCGCACTCGGGTCTGTCCGTGTTCCGCGCGTGGGTGAG  
CGTACCCGTGAGGGCAACGACTTCTACCACGAGATGAAGGACTCCAACGTCCTGGACAAGGTC  
GCGATGGTGTACGGCCAGATGAACGAGCCGCCGGGCAACCGTCTGCGCGTTGCGCTGACCGGC  
CTGACCATGGCCGAGTACTTCCGCGACGAGAAGGACGCCAGCGGCAAGGGCAAGGACGTGCTG  
CTGTTCTGTGACAACATCTACCGCTACACGCTGGCCGGTACCGAAGTGTCCGCGCTGCTCGGCC  
GCATGCCGTCGGCG

>XCAW1

GCGCTCGGCTCCACCGACGGATTGAAGCGCAACCTGCTGGCCACCAACACCGAGCGTGCGATT  
CGGTGCCGGTTGGCGCCGGGACGCTGGGCCGCATCATGGACGTGCTGGGTCGCCCCGATCGACGA  
AGCCGGCGACGTGCAGGCCTCGGATCATTGGGAAATCCACCGCGCTGCGCCGTCGTACGAAGA  
CCAGTCGTCCAGCACCGAATTGCTGGAAACCGGCATCAAGGTGATCGACCTGATGTGCCCGTTC  
GCCAAGGGCGGCAAGGTCGGCCTGTTCCGCGCGCCGGCGTCGGCAAGACCGTCAACATGATG  
GAACTGATCAACAACATCGCAAGGCGCACTCGGGCCTGTCCGTGTTCCGCGCGTGGGTGAGC  
GTACCCGTGAGGGCAACGACTTCTACCACGAGATGAAGGACTCCAACGTCCTGGACAAGGTCG  
CGATGGTGTACGGCCAGATGAACGAGCCGCCGGGCAACCGTCTGCGCGTTGCGCTGACCGGCCT  
GACCATGGCCGAGTACTTCCGCGACGAGAAGGACGCCAGCGGCAAGGGCAAGGACGTGCTGCT  
GTTCTGTGACAACATCTACCGCTACACGCTGGCCGGTACCGAAGTGTCCGCGCTGCTTGGCCG  
ATGCCGTCGGCG

>XCYQ1

GCGCTCGGCTCCACCGACGGATTGAAGCGCAACCTGCTGGCCACCAACACCGAGCGTGCGATT  
CGGTGCCGGTTGGCGCCGGGACGCTGGGCCGCATCATGGACGTGCTGGGTCGCCCCGATCGACGA  
AGCCGGCGACGTGCAGGCCTCGGATCATTGGGAAATCCACCGCGCTGCGCCGTCGTACGAAGA  
CCAGTCGTCCAGCACCGAATTGCTGGAAACCGGCATCAAGGTGATCGACCTGATGTGCCCGTTC  
GCCAAGGGCGGCAAGGTCGGCCTGTTCCGCGCGCCGGCGTCGGCAAGACCGTCAACATGATG  
GAACTGATCAACAACATCGCAAGGCGCACTCGGGCCTGTCCGTGTTCCGCGCGTGGGTGAGC  
GTACCCGTGAGGGCAACGACTTCTACCACGAGATGAAGGACTCCAACGTCCTGGACAAGGTCG  
CGATGGTGTACGGCCAGATGAACGAGCCGCCGGGCAACCGTCTGCGCGTTGCGCTGACCGGCCT  
GACCATGGCCGAGTACTTCCGCGACGAGAAGGACGCCAGCGGCAAGGGCAAGGACGTGCTGCT  
GTTCTGTGACAACATCTACCGCTACACGCTGGCCGGTACCGAAGTGTCCGCGCTGCTTGGCCG  
ATGCCGTCGGCG

>XCYQ2

GCGCTCGGCTCCACCGACGGATTGAAGCGCAACCTGCTGGCCACCAACACCGAGCGTGCGATT  
CGGTGCCGGTTGGCGCCGGGACGCTGGGCCGCATCATGGACGTGCTGGGTCGCCCCGATCGACGA

AGCCGGCGACGTGCAGGCCTCGGATCATTGGGAAATCCACCGCGCTGCGCCGTCGTACGAAGA  
CCAGTCGTCCAGCACCGAATTGCTGGAAACCGGCATCAAGGTGATCGACCTGATGTGCCCGTTC  
GCCAAGGGCGGCAAGGTCGGCCTGTTCCGGCGGCCGGCGTCGGCAAGACCGTCAACATGATG  
GAACTGATCAACAACATCGCCAAGGCGCACTCGGGCCTGTCCGTGTTCCGGCGCTGGGTGAGC  
GTACCCGTGAGGGCAACGACTTCTACCACGAGATGAAGGACTCCAACGTCCTGGACAAGGTCG  
CGATGGTGTACGGCCAGATGAACGAGCCGCCGGGCAACCGTCTGCGCGTTGCGCTGACCGGCCT  
GACCATGGCCGAGTACTTCCGCGACGAGAAGGACGCCAGCGGCAAGGGCAAGGACGTGCTGCT  
GTTTCGTGGACAACATCTACCGCTACACGCTGGCCGGTACCGAAGTGTCCGCGCTGCTTGGCCGC  
ATGCCGTCGGCG

>XCQ3

GCGCTCGGCTCCACCGACGGATTGAAGCGCAACCTGCTGGCCACCAACACCGAGCGTGCGATT  
CGGTGCCGTTGGCGCCGGGACGCTGGGCCGCATCATGGACGTGCTGGGTCGCCCCGATCGACGA  
AGCCGGCGACGTGCAGGCCTCGGATCATTGGGAAATCCACCGCGCTGCGCCGTCGTACGAAGA  
CCAGTCGTCCAGCACCGAATTGCTGGAAACCGGCATCAAGGTGATCGACCTGATGTGCCCGTTC  
GCCAAGGGCGGCAAGGTCGGCCTGTTCCGGCGGCCGGCGTCGGCAAGACCGTCAACATGATG  
GAACTGATCAACAACATCGCCAAGGCGCACTCGGGCCTGTCCGTGTTCCGGCGCTGGGTGAGC  
GTACCCGTGAGGGCAACGACTTCTACCACGAGATGAAGGACTCCAACGTCCTGGACAAGGTCG  
CGATGGTGTACGGCCAGATGAACGAGCCGCCGGGCAACCGTCTGCGCGTTGCGCTGACCGGCCT  
GACCATGGCCGAGTACTTCCGCGACGAGAAGGACGCCAGCGGCAAGGGCAAGGACGTGCTGCT  
GTTTCGTGGACAACATCTACCGCTACACGCTGGCCGGTACCGAAGTGTCCGCGCTGCTTGGCCGC  
ATGCCGTCGGCG

>XCGY1

GCGCTCGGCTCCACCGACGGATTGAAGCGCAACCTGCTGGCCACCAACACCGAGCGTGCGATT  
CGGTGCCGTTGGCGCCGGGACGCTGGGCCGCATCATGGACGTGCTGGGTCGCCCCGATCGACGA  
AGCCGGCGACGTGCAGGCCTCGGATCATTGGGAAATCCACCGCGCTGCGCCGTCGTACGAAGA  
CCAGTCGTCCAGCACCGAATTGCTGGAAACCGGCATCAAGGTGATCGACCTGATGTGCCCGTTC  
GCCAAGGGCGGCAAGGTCGGCCTGTTCCGGCGGCCGGCGTCGGCAAGACCGTCAACATGATG  
GAACTGATCAACAACATCGCCAAGGCGCACTCGGGCCTGTCCGTGTTCCGGCGCTGGGTGAGC  
GTACCCGTGAGGGCAACGACTTCTACCACGAGATGAAGGACTCCAACGTCCTGGACAAGGTCG  
CGATGGTGTACGGCCAGATGAACGAGCCGCCGGGCAACCGTCTGCGCGTTGCGCTGACCGGCCT  
GACCATGGCCGAGTACTTCCGCGACGAGAAGGACGCCAGCGGCAAGGGCAAGGACGTGCTGCT  
GTTTCGTGGACAACATCTACCGCTACACGCTGGCCGGTACCGAAGTGTCCGCGCTGCTTGGCCGC  
ATGCCGTCGGCG

>XCGY2

GCGCTCGGCTCCACCGACGGATTGAAGCGCAACCTGCTGGCCACCAACACCGAGCGTGCGATT  
CGGTGCCGTTGGCGCCGGGACGCTGGGCCGCATCATGGACGTGCTGGGTCGCCCCGATCGACGA  
AGCCGGCGACGTGCAGGCCTCGGATCATTGGGAAATCCACCGCGCTGCGCCGTCGTACGAAGA  
CCAGTCGTCCAGCACCGAATTGCTGGAAACCGGCATCAAGGTGATCGACCTGATGTGCCCGTTC  
GCCAAGGGCGGCAAGGTCGGCCTGTTCCGGCGGCCGGCGTCGGCAAGACCGTCAACATGATG  
GAACTGATCAACAACATCGCCAAGGCGCACTCGGGCCTGTCCGTGTTCCGGCGCTGGGTGAGC  
GTACCCGTGAGGGCAACGACTTCTACCACGAGATGAAGGACTCCAACGTCCTGGACAAGGTCG  
CGATGGTGTACGGCCAGATGAACGAGCCGCCGGGCAACCGTCTGCGCGTTGCGCTGACCGGCCT  
GACCATGGCCGAGTACTTCCGCGACGAGAAGGACGCCAGCGGCAAGGGCAAGGACGTGCTGCT  
GTTTCGTGGACAACATCTACCGCTACACGCTGGCCGGTACCGAAGTGTCCGCGCTGCTTGGCCGC

ATGCCGTCGGCG

>XCGY3

GCGCTCGGCTCCACCGACGGATTGAAGCGAAACCTGCTGGCCACCAACACCGAGCGTGCGATT  
TCGGTGCCGTTGGCGCCGGGACGCTGGGCCGCATCATGGACGTGCTGGGTCGTCGGATCGACG  
AAGCCGGCGACGTGCAGGCCTCGGACCATTGGGAAATCCACCGCGCTGCGCCGTCGTACGAAG  
ACCAGTCGTCCAGCACCGAATTGCTGGAAACCGGCATCAAGGTGATCGACCTGATGTGCCCGTT  
CGCAAGGGCGGCAAGGTCGGCCTGTTTCGGCGGCGCCGGCGTCGGCAAGACCGTCAACATGAT  
GGAECTGATCAACAACATCGCCAAGGCGCACTCGGGTCTGTCCGTGTTTCGCCGGCGTGGGTGAG  
CGTACCCGTGAGGGCAACGACTTCTACCACGAGATGAAGGACTCCAACGTCCTGGACAAGGTC  
GCGATGGTGTACGGCCAGATGAACGAGCCGCCGGGCAACCGTCTGCGCGTTGCGCTGACCGGC  
CTGACCATGGCCGAGTACTTCCGCGACGAGAAGGACGCCAGCGGCAAGGGCAAGGACGTGCTG  
CTGTTTCGTGGACAACATCTACCGCTACACGCTGGCCGGTACCGAAGTGTCCGCGCTGCTCGGCC  
GCATGCCGTCGGCG

>XCC1

GCGCTCGGCTCCACCGACGGATTGAAGCGCAACCTGCTGGCCACCAACACCGAGCGTGCGATT  
CGGTGCCGTTGGCGCCGGGACGCTGGGCCGCATCATGGATGTGCTGGGTCGCCCCGATCGACGA  
AGCCGGCGACGTGCAGGCCTCGGATCATTGGGAAATCCACCGCGCTGCGCCGTCGTACGAAGA  
CCAGTCGTCCAGCACCGAATTGCTGGAAACCGGCATCAAGGTGATCGACCTGATGTGCCCGTTC  
GCCAAGGGCGGCAAGGTCGGCCTGTTTCGGCGGCGCCGGCGTCGGCAAGACCGTCAACATGATG  
GAACTGATCAACAACATCGCCAAGGCGCACTCGGGCCTGTCCGTGTTTCGCCGGCGTGGGTGAGC  
GTACCCGTGAGGGCAACGACTTCTACCACGAGATGAAGGACTCCAACGTCCTGGACAAGGTCG  
CGATGGTGTACGGCCAGATGAACGAGCCGCCGGGCAACCGTCTGCGCGTTGCGCTGACCGGCCT  
GACCATGGCCGAGTACTTCCGCGACGAGAAGGACGAGAACGGCAAGGGCAAGGACGTGCTGC  
TGTTTCGTGGACAACATCTACCGCTACACGCTGGCCGGTACCGAAGTGTCCGCGCTGCTTGGCCG  
CATGCCGTCGGCG

>XCC2

GCGCTCGGCTCCACCGACGGATTGAAGCGCAACCTGCTGGCCACCAACACCGAGCGTGCGATT  
CGGTGCCGTTGGCGCCGGGACGCTGGGCCGCATCATGGACGTGCTGGGTCGCCCCGATCGACGA  
AGCCGGCGACGTGCAGGCCTCGGACCATTGGGAAATCCACCGCGCTGCGCCGTCGTACGAAGA  
CCAGTCGTCCAGCACCGAATTGCTGGAAACCGGCATCAAGGTGATCGACCTGATGTGCCCGTTC  
GCCAAGGGCGGCAAGGTCGGCCTGTTTCGGCGGCGCCGGCGTCGGCAAGACCGTCAACATGATG  
GAACTCATCAACAACATCGCCAAGGCGCACTCGGGTCTGTCCGTGTTTCGCCGGCGTGGGTGAGC  
GTACCCGTGAGGGCAACGACTTCTACCACGAGATGAAGGACTCCAACGTCCTGGACAAGGTCG  
CGATGGTGTACGGCCAGATGAACGAGCCGCCGGGCAACCGTCTGCGCGTTGCGCTGACCGGCCT  
GACCATGGCCGAGTACTTCCGCGACGAGAAGGACGCCAGCGGCAAGGGCAAGGACGTGCTGTT  
GTTTCGTGGACAACATCTACCGCTACACGCTGGCCGGTACCGAAGTGTCCGCGCTGCTCGGCCG  
ATGCCGTCGGCG

>XCZB1

GCGCTCGGCTCCACCGACGGATTGAAGCGCAACCTGCTGGCCACCAACACCGAGCGTGCGATT  
CGGTGCCGTTGGCGCCGGGACGCTGGGCCGCATCATGGACGTGCTGGGTCGCCCCGATCGACGA  
AGCCGGCGACGTGCAGGCCTCGGATCATTGGGAAATCCACCGCGCTGCGCCGTCGTACGAAGA  
CCAGTCGTCCAGCACCGAATTGCTGGAAACCGGCATCAAGGTGATCGACCTGATGTGCCCGTTC  
GCCAAGGGCGGCAAGGTCGGCCTGTTTCGGCGGCGCCGGCGTCGGCAAGACCGTCAACATGATG  
GAACTGATCAACAACATCGCCAAGGCGCACTCGGGCCTGTCCGTGTTTCGCCGGCGTGGGTGAGC



GTACCCGTGAGGGCAACGACTTCTACCACGAGATGAAGGACTCCAACGTCCTGGACAAGGTCG  
CGATGGTGTACGGCCAGATGAACGAGCCGCCGGGCAACCGTCTGCGCGTTGCGCTGACCGGCCT  
GACCATGGCCGAGTACTTCCGCGACGAGAAGGACGCCAGCGGCAAGGGCAAGGACGTGCTGCT  
GTTTCGTGGACAACATCTACCGCTACACGCTGGCCGGTACCGAAGTGTCCGCGCTGCTTGGCCGC  
ATGCCGTCGGCG

>XCZB2

GCGCTCGGCTCCACCGACGGATTGAAGCGCAACCTGCTGGCCACCAACACCGAGCGTGCGATTT  
CGGTGCCGGTTGGCGCCGGGACGCTGGGCCGCATCATGGACGTGCTGGGTCGCCCGATCGACGA  
AGCCGGCGACGTGCAGGCCTCGGATCATTGGGAAATCCACCGCGCTGCGCCGTCGTACGAAGA  
CCAGTCGTCCAGCACCGAATTGCTGGAAACCGGCATCAAGGTGATCGACCTGATGTGCCCGTTC  
GCCAAGGGCGGCAAGGTCGGCCTGTTCCGGCGGCCGGCGTCCGGCAAGACCGTCAACATGATG  
GAACTGATCAACAACATCGCCAAGGCGCACTCGGGCCTGTCCGTGTTCCGCCGGCGTGGGTGAGC  
GTACCCGTGAGGGCAACGACTTCTACCACGAGATGAAGGACTCCAACGTCCTGGACAAGGTCG  
CGATGGTGTACGGCCAGATGAACGAGCCGCCGGGCAACCGTCTGCGCGTTGCGCTGACCGGCCT  
GACCATGGCCGAGTACTTCCGCGACGAGAAGGACGCCAGCGGCAAGGGCAAGGACGTGCTGCT  
GTTTCGTGGACAACATCTACCGCTACACGCTGGCCGGTACCGAAGTGTCCGCGCTGCTTGGCCGC  
ATGCCGTCGGCG

>XCZB3

GCGCTCGGCTCCACCGACGGATTGAAGCGCAACCTGCTGGCCACCAACACCGAGCGTGCGATTT  
CGGTGCCGGTTGGCGCCGGGACGCTGGGCCGCATCATGGACGTGCTGGGTCGCCCGATCGACGA  
AGCCGGCGACGTGCAGGCCTCGGATCATTGGGAAATCCACCGCGCTGCGCCGTCGTACGAAGA  
CCAGTCGTCCAGCACCGAATTGCTGGAAACCGGCATCAAGGTGATCGACCTGATGTGCCCGTTC  
GCCAAGGGCGGCAAGGTCGGCCTGTTCCGGCGGCCGGCGTCCGGCAAGACCGTCAACATGATG  
GAACTGATCAACAACATCGCCAAGGCGCACTCGGGCCTGTCCGTGTTCCGCCGGCGTGGGTGAGC  
GTACCCGTGAGGGCAACGACTTCTACCACGAGATGAAGGACTCCAACGTCCTGGACAAGGTCG  
CGATGGTGTACGGCCAGATGAACGAGCCGCCGGGCAACCGTCTGCGCGTTGCGCTGACCGGCCT  
GACCATGGCCGAGTACTTCCGCGACGAGAAGGACGCCAGCGGCAAGGGCAAGGACGTGCTGCT  
GTTTCGTGGACAACATCTACCGCTACACGCTGGCCGGTACCGAAGTGTCCGCGCTGCTTGGCCGC  
ATGCCGTCGGCG

>XCGZ1

GCGCTCGGCTCCACCGACGGATTGAAGCGCAACCTGCTGGCCACCAACACCGAGCGTGCGATTT  
CGGTGCCGGTTGGCGCCGGGACGCTGGGCCGCATCATGGACGTGCTGGGTCGCCCGATCGACGA  
AGCCGGCGACGTGCAGGCCTCGGATCATTGGGAAATCCACCGCGCTGCGCCGTCGTACGAAGA  
CCAGTCGTCCAGCACCGAATTGCTGGAAACCGGCATCAAGGTGATCGACCTGATGTGCCCGTTC  
GCCAAGGGCGGCAAGGTCGGCCTGTTCCGGCGGCCGGCGTCCGGCAAGACCGTCAACATGATG  
GAACTGATCAACAACATCGCCAAGGCGCACTCGGGCCTGTCCGTGTTCCGCCGGCGTGGGTGAGC  
GTACCCGTGAGGGCAACGACTTCTACCACGAGATGAAGGACTCCAACGTCCTGGACAAGGTCG  
CGATGGTGTACGGCCAGATGAACGAGCCGCCGGGCAACCGTCTGCGCGTTGCGCTGACCGGCCT  
GACCATGGCCGAGTACTTCCGCGACGAGAAGGACGCCAGCGGCAAGGGCAAGGACGTGCTGCT  
GTTTCGTGGACAACATCTACCGCTACACGCTGGCCGGTACCGAAGTGTCCGCGCTGCTTGGCCGC  
ATGCCGTCGGCG

>XCGZ2

GCGCTCGGCTCCACCGACGGATTGAAGCGCAACCTGCTGGCCACCAACACCGAGCGTGCGATTT  
CGGTGCCGGTTGGCGCCGGGACGCTGGGCCGCATCATGGACGTGCTGGGTCGCCCGATCGACGA

AGCCGGCGACGTGCAGGCCTCGGATCATTGGGAAATCCACCGCGCTGCGCCGTCGTACGAAGA  
CCAGTCGTCCAGCACCGAATTGCTGGAAACCGGCATCAAGGTGATCGACCTGATGTGCCCGTTC  
GCCAAGGGCGGCAAGGTCGGCCTGTTCCGGCGGCCGGCGTCGGCAAGACCGTCAACATGATG  
GAACTGATCAACAACATCGCCAAGGCGCACTCGGGCCTGTCCGTGTTCCGGCGCTGGGTGAGC  
GTACCCGTGAGGGCAACGACTTCTACCACGAGATGAAGGACTCCAACGTCCTGGACAAGGTCG  
CGATGGTGTACGGCCAGATGAACGAGCCGCCGGGCAACCGTCTGCGCGTTGCGCTGACCGGCCT  
GACCATGGCCGAGTACTTCCGCGACGAGAAGGACGCCAGCGGCAAGGGCAAGGACGTGCTGCT  
GTTCTGTGACAACATCTACCGCTACACGCTGGCCGGTACCGAAGTGTCCGCGCTGCTTGGCCGC  
ATGCCGTCGGCG

>XCHN1

GCGCTCGGCTCCACCGACGGATTGAAGCGCAACCTGCTGGCCACCAACACCGAGCGTGCGATTT  
CGGTGCCGTTGGCGCCGGGACGCTGGGCCGCATCATGGACGTGCTGGGTCGCCCCGATCGACGA  
AGCCGGCGACGTGCAGGCCTCGGATCATTGGGAAATCCACCGCGCTGCGCCGTCGTACGAAGA  
CCAGTCGTCCAGCACCGAATTGCTGGAAACCGGCATCAAGGTGATCGACCTGATGTGCCCGTTC  
GCCAAGGGCGGCAAGGTCGGCCTGTTCCGGCGGCCGGCGTCGGCAAGACCGTCAACATGATG  
GAACTGATCAACAACATCGCCAAGGCGCACTCGGGCCTGTCCGTGTTCCGGCGCTGGGTGAGC  
GTACCCGTGAGGGCAACGACTTCTACCACGAGATGAAGGACTCCAACGTCCTGGACAAGGTCG  
CGATGGTGTACGGCCAGATGAACGAGCCGCCGGGCAACCGTCTGCGCGTTGCGCTGACCGGCCT  
GACCATGGCCGAGTACTTCCGCGACGAGAAGGACGCCAGCGGCAAGGGCAAGGACGTGCTGCT  
GTTCTGTGACAACATCTACCGCTACACGCTGGCCGGTACCGAAGTGTCCGCGCTGCTTGGCCGC  
ATGCCGTCGGCG

>XCHN2

GCGCTCGGCTCCACCGACGGATTGAAGCGCAACCTGCTGGCCACCAACACCGAGCGTGCGATTT  
CGGTGCCGTTGGCGCCGGGACGCTGGGCCGCATCATGGACGTGCTGGGTCGCCCCGATCGACGA  
AGCCGGCGACGTGCAGGCCTCGGATCATTGGGAAATCCACCGCGCTGCGCCGTCGTACGAAGA  
CCAGTCGTCCAGCACCGAATTGCTGGAAACCGGCATCAAGGTGATCGACCTGATGTGCCCGTTC  
GCCAAGGGCGGCAAGGTCGGCCTGTTCCGGCGGCCGGCGTCGGCAAGACCGTCAACATGATG  
GAACTGATCAACAACATCGCCAAGGCGCACTCGGGCCTGTCCGTGTTCCGGCGCTGGGTGAGC  
GTACCCGTGAGGGCAACGACTTCTACCACGAGATGAAGGACTCCAACGTCCTGGACAAGGTCG  
CGATGGTGTACGGCCAGATGAACGAGCCGCCGGGCAACCGTCTGCGCGTTGCGCTGACCGGCCT  
GACCATGGCCGAGTACTTCCGCGACGAGAAGGACGCCAGCGGCAAGGGCAAGGACGTGCTGCT  
GTTCTGTGACAACATCTACCGCTACACGCTGGCCGGTACCGAAGTGTCCGCGCTGCTTGGCCGC  
ATGCCGTCGGCG

>XCNM2

GCGCTCGGCTCCACCGACGGATTGAAGCGCAACCTGCTGGCCACCAACACCGAGCGTGCGATTT  
CGGTGCCGTTGGCGCCGGGACGCTGGGCCGCATCATGGACGTGCTGGGTCGCCCCGATCGACGA  
AGCCGGCGACGTGCAGGCCTCGGATCATTGGGAAATCCACCGCGCTGCGCCGTCGTACGAAGA  
CCAGTCGTCCAGCACCGAATTGCTGGAAACCGGCATCAAGGTGATCGACCTGATGTGCCCGTTC  
GCCAAGGGCGGCAAGGTCGGCCTGTTCCGGCGGCCGGCGTCGGCAAGACCGTCAACATGATG  
GAACTGATCAACAACATCGCCAAGGCGCACTCGGGCCTGTCCGTGTTCCGGCGCTGGGTGAGC  
GTACCCGTGAGGGCAACGACTTCTACCACGAGATGAAGGACTCCAACGTCCTGGACAAGGTCG  
CGATGGTGTACGGCCAGATGAACGAGCCGCCGGGCAACCGTCTGCGCGTTGCGCTGACCGGCCT  
GACCATGGCCGAGTACTTCCGCGACGAGAAGGACGCCAGCGGCAAGGGCAAGGACGTGCTGCT  
GTTCTGTGACAACATCTACCGCTACACGCTGGCCGGTACCGAAGTGTCCGCGCTGCTTGGCCGC

ATGCCGTCGGCG

>XCXZ

GCGCTCGGCTCCACCGACGGATTGAAGCGCAACCTGCTGGCCACCAACACCGAGCGTGCGATT  
CGGTGCCGTTGGCGCCGGGACGCTGGGCCGCATCATGGACGTGCTGGGTCGCCCGATCGACGA  
AGCCGGCGACGTGCAGGCCTCGGATCATTGGGAAATCCACCGCGCTGCGCCGTCGTACGAAGA  
CCAGTCGTCCAGCACCGAATTGCTGGAAACCGGCATCAAGGTGATCGACCTGATGTGCCCGTTC  
GCCAAGGGCGGCAAGGTCGGCCTGTTCCGGCGGCCGGCGTTCGGCAAGACCGTCAACATGATG  
GAACTGATCAACAACATCGCCAAGGCGCACTCGGGCCTGTCCGTGTTCCGCCGGCGTGGGTGAGC  
GTACCCGTGAGGGCAACGACTTCTACCACGAGATGAAGGACTCCAACGTCCTGGACAAGGTCG  
CGATGGTGTACGGCCAGATGAACGAGCCGCCGGGCAACCGTCTGCGCGTTGCGCTGACCGGCCT  
GACCATGGCCGAGTACTTCCGCGACGAGAAGGACGCCAGCGGCAAGGGCAAGGACGTGCTGCT  
GTTTCGTGGACAACATCTACCGCTACACGCTGGCCGGTACCGAAGTGTCCGCGCTGCTTGGCCGC  
ATGCCGTCGGCG

>XCJY

GCGCTCGGCTCCACCGACGGATTGAAGCGCAACCTGCTGGCCACCAACACCGAGCGTGCGATT  
CGGTGCCGTTGGCGCCGGGACGCTGGGCCGCATCATGGACGTGCTGGGTCGCCCGATCGACGA  
AGCCGGCGACGTGCAGGCCTCGGATCATTGGGAAATCCACCGCGCTGCGCCGTCGTACGAAGA  
CCAGTCGTCCAGCACCGAATTGCTGGAAACCGGCATCAAGGTGATCGACCTGATGTGCCCGTTC  
GCCAAGGGCGGCAAGGTCGGCCTGTTCCGGCGGCCGGCGTTCGGCAAGACCGTCAACATGATG  
GAACTGATCAACAACATCGCCAAGGCGCACTCGGGCCTGTCCGTGTTCCGCCGGCGTGGGTGAGC  
GTACCCGTGAGGGCAACGACTTCTACCACGAGATGAAGGACTCCAACGTCCTGGACAAGGTCG  
CGATGGTGTACGGCCAGATGAACGAGCCGCCGGGCAACCGTCTGCGCGTTGCGCTGACCGGCCT  
GACCATGGCCGAGTACTTCCGCGACGAGAAGGACGCCAGCGGCAAGGGCAAGGACGTGCTGCT  
GTTTCGTGGACAACATCTACCGCTACACGCTGGCCGGTACCGAAGTGTCCGCGCTGCTTGGCCGC  
ATGCCGTCGGCG

>XCTY

GCGCTCGGCTCCACCGACGGATTGAAGCGCAACCTGCTGGCCACCAACACCGAGCGTGCGATT  
CGGTGCCGTTGGCGCCGGGACGCTGGGCCGCATCATGGACGTGCTGGGTCGCCCGATCGACGA  
AGCCGGCGACGTGCAGGCCTCGGACCATTGGGAAATCCACCGCGCTGCGCCGTCGTACGAAGA  
CCAGTCGTCCAGCACCGAATTGCTGGAAACCGGCATCAAGGTGATCGACCTGATGTGCCCGTTC  
GCCAAGGGCGGCAAGGTCGGCCTGTTCCGGCGGCCGGCGTTCGGCAAGACCGTCAACATGATG  
GAACTCATCAACAACATCGCCAAGGCGCACTCGGGTCTGTCCGTGTTCCGCCGGCGTGGGTGAGC  
GTACCCGTGAGGGCAACGACTTCTACCACGAGATGAAGGACTCCAACGTCCTGGACAAGGTCG  
CGATGGTGTACGGCCAGATGAACGAGCCGCCGGGCAACCGTCTGCGCGTTGCGCTGACCGGCCT  
GACCATGGCCGAGTACTTCCGCGACGAGAAGGACGCCAGCGGCAAGGGCAAGGACGTGCTGTT  
GTTTCGTGGACAACATCTACCGCTACACGCTGGCCGGTACCGAAGTGTCCGCGCTGCTCGGCCGC  
ATGCCGTCGGCG

>XCNM1

GCGCTCGGCTCCACCGACGGATTGAAGCGCAACCTGCTGGCCACCAACACCGAGCGTGCGATT  
CGGTGCCGTTGGCGCCGGGACGCTGGGCCGCATCATGGACGTGCTGGGTCGCCCGATCGACGA  
AGCCGGCGACGTGCAGGCCTCGGATCATTGGGAAATCCACCGCGCTGCGCCGTCGTACGAAGA  
CCAGTCGTCCAGCACCGAATTGCTGGAAACCGGCATCAAGGTGATCGACCTGATGTGCCCGTTC  
GCCAAGGGCGGCAAGGTCGGCCTGTTCCGGCGGCCGGCGTTCGGCAAGACCGTCAACATGATG  
GAACTGATCAACAACATCGCCAAGGCGCACTCGGGCCTGTCCGTGTTCCGCCGGCGTGGGTGAGC

GTACCCGTGAGGGCAACGACTTCTACCACGAGATGAAGGACTCCAACGTCCTGGACAAGGTCG  
CGATGGTGTACGGCCAGATGAACGAGCCGCCGGGCAACCGTCTGCGCGTTGCGCTGACCGGCCT  
GACCATGGCCGAGTACTTCCGCGACGAGAAGGACGCCAGCGGCAAGGGCAAGGACGTGCTGCT  
GTTTCGTGGACAACATCTACCGCTACACGCTGGCCGGTACCGAAGTGTCCGCGCTGCTTGGCCGC  
ATGCCGTCGGCG

>XCGZ3

GCGCTCGGCTCCACCGACGGATTGAAGCGCAACCTGCTGGCCACCAACACCGAGCGTGCGATTT  
CGGTGCCGGTTGGCGCCGGGACGCTGGGCCGCATCATGGACGTGCTGGGTCGCCCGATCGACGA  
AGCCGGCGACGTGCAGGCCTCGGATCATTGGGAAATCCACCGCGCTGCGCCGTCGTACGAAGA  
CCAGTCGTCCAGCACCGAATTGCTGGAAACCGGCATCAAGGTGATCGACCTGATGTGCCCGTTC  
GCCAAGGGCGGCAAGGTCGGCCTGTTCCGGCGGCCGGCGTCCGGCAAGACCGTCAACATGATG  
GAACTGATCAACAACATCGCCAAGGCGCACTCGGGCCTGTCCGTGTTCCGCCGGCGTGGGTGAGC  
GTACCCGTGAGGGCAACGACTTCTACCACGAGATGAAGGACTCCAACGTCCTGGACAAGGTCG  
CGATGGTGTACGGCCAGATGAACGAGCCGCCGGGCAACCGTCTGCGCGTTGCGCTGACCGGCCT  
GACCATGGCCGAGTACTTCCGCGACGAGAAGGACGCCAGCGGCAAGGGCAAGGACGTGCTGCT  
GTTTCGTGGACAACATCTACCGCTACACGCTGGCCGGTACCGAAGTGTCCGCGCTGCTTGGCCGC  
ATGCCGTCGGCG

>XCC4

GCGCTCGGCTCCACCGACGGATTGAAGCGCAACCTGCTGGCCACCAACACCGAGCGTGCGATTT  
CGGTGCCGGTTGGCGCCGGGACGCTGGGCCGCATCATGGACGTGCTGGGTCGCCCGATCGACGA  
AGCCGGCGACGTGCAGGCCTCGGACCATTGGGAAATCCACCGCGCTGCGCCGTCGTACGAAGA  
CCAGTCGTCCAGCACCGAATTGCTGGAAACCGGCATCAAGGTGATCGACCTGATGTGCCCATTC  
GCCAAGGGCGGCAAGGTCGGCCTGTTCCGGCGGCCGGCGTCCGGCAAGACCGTCAACATGATG  
GAACTCATCAACAACATCGCCAAGGCGCACTCGGGTCTGTCCGTGTTCCGCCGGCGTGGGTGAGC  
GTACCCGTGAGGGCAACGACTTCTACCACGAGATGAAGGACTCCAACGTCCTGGACAAGGTCG  
CGATGGTGTACGGCCAGATGAACGAGCCGCCGGGCAACCGTCTGCGCGTTGCGCTGACCGGCCT  
GACCATGGCCGAGTACTTCCGCGACGAGAAGGACGCCAGCGGCAAGGGCAAGGACGTGCTGTT  
GTTTCGTGGACAACATCTACCGCTACACGCTGGCCGGTACCGAAGTGTCCGCGCTGCTCGGCCGC  
ATGCCGTCGGCG

>XCXZ1

GCGCTCGGCTCCACCGACGGATTGAAGCGCAACCTGCTGGCCACCAACACCGAGCGTGCGATTT  
CGGTGCCGGTTGGCGCCGGGACGCTGGGCCGCATCATGGACGTGCTGGGTCGCCCGATCGACGA  
AGCCGGCGACGTGCAGGCCTCGGATCATTGGGAAATCCACCGCGCTGCGCCGTCGTACGAAGA  
CCAGTCGTCCAGCACCGAATTGCTGGAAACCGGCATCAAGGTGATCGACCTGATGTGCCCGTTC  
GCCAAGGGCGGCAAGGTCGGCCTGTTCCGGCGGCCGGCGTCCGGCAAGACCGTCAACATGATG  
GAACTGATCAACAACATCGCCAAGGCGCACTCGGGCCTGTCCGTGTTCCGCCGGCGTGGGTGAGC  
GTACCCGTGAGGGCAACGACTTCTACCACGAGATGAAGGACTCCAACGTCCTGGACAAGGTCG  
CGATGGTGTACGGCCAGATGAACGAGCCGCCGGGCAACCGTCTGCGCGTTGCGCTGACCGGCCT  
GACCATGGCCGAGTACTTCCGCGACGAGAAGGACGCCAGCGGCAAGGGCAAGGACGTGCTGCT  
GTTTCGTGGACAACATCTACCGCTACACGCTGGCCGGTACCGAAGTGTCCGCGCTGCTTGGCCGC  
ATGCCGTCGGCG

>XCGY4

GCGCTCGGCTCCACCGACGGATTGAAGCGAAACCTGCTGGCCACCAACACCGAGCGTGCGATT  
TCGGTGCCGGTTGGCGCCGGGACGCTGGGCCGCATCATGGACGTGCTGGGTCGTCCGATCGACG

AAGCCGGCGACGTGCAGGCCTCGGACCATTGGGAAATCCACCGCGCTGCGCCGTCGTACGAAG  
ACCAGTCGTCCAGCACCGAATTGCTGGAAACCGGCATCAAGGTGATCGACCTGATGTGCCCGTT  
CGCCAAGGGCGGCAAGGTCGGCCTGTTTCGGCGGCGCCGGCGTCGGCAAGACCGTCAACATGAT  
GGAAGTATCAACAACATCGCCAAGGCGCACTCGGGTCTGTCCGTGTTTCGCCGGCGTGGGTGAG  
CGTACCCGTGAGGGCAACGACTTCTACCACGAGATGAAGGACTCCAACGTCCTGGACAAGGTC  
CGGATGGTGTACGGCCAGATGAACGAGCCGCGGGCAACCGTCTGCGCGTTGCGCTGACCGGC  
CTGACCATGGCCGAGTACTTCCGCGACGAGAAGGACGCCAGCGGCAAGGGCAAGGACGTGCTG  
CTGTTTCGTGGACAACATCTACCGCTACACGCTGGCCGGTACCGAAGTGTCCGCGCTGCTCGGCC  
GCATGCCGTCGGCG

>XCAW2

GCGCTCGGCTCCACCGACGGATTGAAGCGCAACCTGCTGGCCACCAACACCGAGCGTGCGATTT  
CGGTGCCGTTGGCGCCGGGACGCTGGGCCGCATCATGGACGTGCTGGGTGCGCCGATCGACGA  
AGCCGGCGACGTGCAGGCCTCGGATCATTGGGAAATCCACCGCGCTGCGCCGTCGTACGAAGA  
CCAGTCGTCCAGCACCGAATTGCTGGAAACCGGCATCAAGGTGATCGACCTGATGTGCCCGTTC  
GCCAAGGGCGGCAAGGTCGGCCTGTTTCGGCGGCGCCGGCGTCGGCAAGACCGTCAACATGATG  
GAACTGATCAACAACATCGCCAAGGCGCACTCGGGCCTGTCCGTGTTTCGCCGGCGTGGGTGAGC  
GTACCCGTGAGGGCAACGACTTCTACCACGAGATGAAGGACTCCAACGTCCTGGACAAGGTCG  
CGATGGTGTACGGCCAGATGAACGAGCCGCGGGCAACCGTCTGCGCGTTGCGCTGACCGGCCT  
GACCATGGCCGAGTACTTCCGCGACGAGAAGGACGCCAGCGGCAAGGGCAAGGACGTGCTGCT  
GTTTCGTGGACAACATCTACCGCTACACGCTGGCCGGTACCGAAGTGTCCGCGCTGCTTGGCCGC  
ATGCCGTCGGCG

>XCAW3

GCGCTCGGCTCCACCGACGGATTGAAGCGCAACCTGCTGGCCACCAACACCGAGCGTGCGATTT  
CGGTGCCGTTGGCGCCGGGACGCTGGGCCGCATCATGGACGTGCTGGGTGCGCCGATCGACGA  
AGCCGGCGACGTGCAGGCCTCGGATCATTGGGAAATCCACCGCGCTGCGCCGTCGTACGAAGA  
CCAGTCGTCCAGCACCGAATTGCTGGAAACCGGCATCAAGGTGATCGACCTGATGTGCCCGTTC  
GCCAAGGGCGGCAAGGTCGGCCTGTTTCGGCGGCGCCGGCGTCGGCAAGACCGTCAACATGATG  
GAACTGATCAACAACATCGCCAAGGCGCACTCGGGCCTGTCCGTGTTTCGCCGGCGTGGGTGAGC  
GTACCCGTGAGGGCAACGACTTCTACCACGAGATGAAGGACTCCAACGTCCTGGACAAGGTCG  
CGATGGTGTACGGCCAGATGAACGAGCCGCGGGCAACCGTCTGCGCGTTGCGCTGACCGGCCT  
GACCATGGCCGAGTACTTCCGCGACGAGAAGGACGCCAGCGGCAAGGGCAAGGACGTGCTGCT  
GTTTCGTGGACAACATCTACCGCTACACGCTGGCCGGTACCGAAGTGTCCGCGCTGCTTGGCCGC  
ATGCCGTCGGCG

>race 1

GCGCTCGGCTCCACCGACGGATTGAAGCGCAACCTGCTGGCCACCAACACCGAGCGTGCGATTT  
CGGTGCCGTTGGCGCCGGGACGCTGGGCCGCATCATGGACGTGCTGGGTGCGCCGATCGACGA  
AGCCGGCGACGTGCAGGCCTCGGACCATTGGGAAATCCACCGCGCTGCGCCGTCGTACGAAGA  
CCAGTCGTCCAGCACCGAATTGCTGGAAACCGGCATCAAGGTGATCGACCTGATGTGCCCATTC  
GCCAAGGGCGGCAAGGTCGGCCTGTTTCGGCGGCGCCGGCGTCGGCAAGACCGTCAACATGATG  
GAACTCATCAACAACATCGCCAAGGCGCACTCGGGTCTGTCCGTGTTTCGCCGGCGTGGGTGAGC  
GTACCCGTGAGGGCAACGACTTCTACCACGAGATGAAGGACTCCAACGTCCTGGACAAGGTCG  
CGATGGTGTACGGCCAGATGAACGAGCCGCGGGCAACCGTCTGCGCGTTGCGCTGACCGGCCT  
GACCATGGCCGAGTACTTCCGCGACGAGAAGGACGCCAGCGGCAAGGGCAAGGACGTGCTGTT  
GTTTCGTGGACAACATCTACCGCTACACGCTGGCCGGTACCGAAGTGTCCGCGCTGCTCGGCCGC

ATGCCGTCGGCG

>race 2

GCGCTCGGCTCCACCGACGGATTGAAGCGAAACCTGCTGGCCACCAACACCGAGCGTGCGATT  
TCGGTGCCGTTGGCGCCGGGACGCTGGGCCGCATCATGGACGTGCTGGGTCGTCGGATCGACG  
AAGCCGGCGACGTGCAGGCCTCGGACCATTGGGAAATCCACCGCGCTGCGCCGTCGTACGAAG  
ACCAGTCGTCCAGCACCGAATTGCTGGAAACCGGCATCAAGGTGATCGACCTGATGTGCCCGTT  
CGCCAAGGGCGGCAAGGTTCGGCCTGTTTCGGCGCGCCGGCGTCGGCAAGACCGTCAACATGAT  
GGAECTGATCAACAACATCGCCAAGGCGCACTCGGGTCTGTCCGTGTTTCGCCGGCGTGGGTGAG  
CGTACCCGTGAGGGCAACGACTTCTACCACGAGATGAAGGACTCCAACGTCCTGGACAAGGTC  
GCGATGGTGTACGGCCAGATGAACGAGCCCGCGGCAACCGTCTGCGCGTTGCGCTGACCGGC  
CTGACCATGGCCGAGTACTTCCGCGACGAGAAGGACGCCAGCGGCAAGGGCAAGGACGTGCTG  
CTGTTTCGTGGACAACATCTACCGCTACACGCTGGCCGGTACCGAAGTGTCCGCGCTGCTCGGCC  
GCATGCCGTCGGCG

>race 3

GCGCTCGGCTCCACCGACGGATTGAAGCGCAACCTGCTGGCCACCAACACCGAGCGTGCGATT  
CGGTGCCGTTGGCGCCGGGACGCTGGGCCGCATCATGGATGTGCTGGGTCGCCCCGATCGACGA  
AGCCGGCGACGTGCAGGCCTCGGATCATTGGGAAATCCACCGCGCTGCGCCGTCGTACGAAGA  
CCAGTCGTCCAGCACCGAATTGCTGGAAACCGGCATCAAGGTGATCGACCTGATGTGCCCGTTC  
GCCAAGGGCGGCAAGGTTCGGCCTGTTTCGGCGCGCCGGCGTCGGCAAGACCGTCAACATGATG  
GAACTGATCAACAACATCGCCAAGGCGCACTCGGGCCTGTCCGTGTTTCGCCGGCGTGGGTGAGC  
GTACCCGTGAGGGCAACGACTTCTACCACGAGATGAAGGACTCCAACGTCCTGGACAAGGTCG  
CGATGGTGTACGGCCAGATGAACGAGCCCGCGGCAACCGTCTGCGCGTTGCGCTGACCGGCCT  
GACCATGGCCGAGTACTTCCGCGACGAGAAGGACGAGAACGGCAAGGGCAAGGACGTGCTGC  
TGTTTCGTGGACAACATCTACCGCTACACGCTGGCCGGTACCGAAGTGTCCGCGCTGCTTGGCCG  
CATGCCGTCGGCG

>race 4

GCGCTCGGCTCCACCGACGGATTGAAGCGCAACCTGCTGGCCACCAACACCGAGCGTGCGATT  
CGGTGCCGTTGGCGCCGGGACGCTGGGCCGCATCATGGACGTGCTGGGTCGTCGGATCGACGA  
AGCCGGCGACGTGCAGGCCTCGGACCATTGGGAAATCCACCGCGCTGCGCCGTCGTACGAAGA  
CCAGTCGTCCAGCACCGAATTGCTGGAAACCGGCATCAAGGTGATCGACCTCATGTGCCCGTTC  
GCCAAGGGCGGCAAGGTTCGGCCTGTTTCGGCGCGCCGGCGTCGGCAAGACCGTCAACATGATG  
GAACTCATCAACAACATCGCCAAGGCGCACTCGGGCCTGTCCGTGTTTCGCCGGCGTGGGTGAA  
GTACCCGTGAGGGCAACGACTTCTACCATGAGATGAAGGACTCCAACGTCCTGGACAAGGTGG  
CGATGGTGTACGGCCAGATGAACGAGCCCGCGGCAACCGTCTGCGCGTTGCATTGACCGGCCT  
GACCATGGCCGAGTACTTCCGCGATGAGAAGGACGCCAGCGGCAAGGGCAAGGACGTGCTGTT  
GTTTCGTGGACAACATCTACCGCTACACGCTGGCCGGTACCGAAGTGTCCGCGCTGCTCGGCCG  
ATGCCGTCGGCC

>race 5

GCGCTCGGCTCCACCGACGGATTGAAGCGCAACCTGCTGGCCACCAACACCGAGCGTGCGATT  
CGGTGCCGTTGGCGCCGGGACGCTGGGCCGCATCATGGATGTGCTGGGTCGCCCCGATCGACGA  
AGCCGGCGACGTGCAGGCCTCGGATCATTGGGAAATCCACCGCGCTGCGCCGTCGTACGAAGA  
CCAGTCGTCCAGCACCGAATTGCTGGAAACCGGCATCAAGGTGATCGACCTGATGTGCCCGTTC  
GCCAAGGGCGGCAAGGTTCGGCCTGTTTCGGCGCGCCGGCGTCGGCAAGACCGTCAACATGATG  
GAACTGATCAACAACATCGCCAAGGCGCACTCGGGCCTGTCCGTGTTTCGCCGGCGTGGGTGAGC

GTACCCGTGAGGGCAACGACTTCTACCACGAGATGAAGGACTCCAACGTCCTGGACAAGGTGCG  
CGATGGTGTACGGCCAGATGAACGAGCCGCCGGGCAACCGTCTGCGCGTTGCGCTGACCCGGCCT  
GACCATGGCCGAGTACTTCCGCGACGAGAAGGACGAGAACGGCAAGGGCAAGGACGTGCTGC  
TGTTTCGTGGACAACATCTACCGCTACACGCTGGCCGGTACCGAAGTGTCGCGCTGCTTGGCCG  
CATGCCGTCGGCG

>race 6

GCGCTCGGCTCCACCGACGGATTGAAGCGCAACCTGCTGGCCACCAACACCGAGCGTGCGATTT  
CGGTGCCGGTTGGGCCCGGGACGCTGGGCCGCATCATGGACGTGCTGGGTGCGCCGATCGACGA  
AGCCGGCGACGTGCAGGCCTCGGACCATTGGGAAATTCACCGCGCTGCGCCGTCGTACGAAGA  
CCAGTCGTCCAGCACCGAATTGCTGGAAACCGGCATCAAGGTGATCGACCTGATGTGCCCGTTC  
GCCAAGGGCGGCAAGGTCGGCCTGTTCCGGCGGCCGGCGTCCGGCAAGACCGTCAACATGATG  
GAACTGATCAACAACATCGCCAAGGCGCACTCGGGTCTGTCCGTGTTCCGGCGCTGGGTGAGC  
GTACCCGTGAGGGCAACGACTTCTACCACGAGATGAAGGACTCCAACGTCCTGGACAAGGTGCG  
CGATGGTGTACGGCCAGATGAACGAGCCGCCGGGCAACCGTCTGCGCGTTGCACTGACCCGGCC  
TGACCATGGCCGAGTACTTCCGCGATGAGAAGGACGCCAGCGGCAAGGGCAAGGACGTGCTGT  
TGTTTCGTGGACAACATTTACCGCTACACGCTGGCCGGTACCGAAGTGTCGCGCTGCTCGGCCG  
CATGCCGTCGGCG

>race 9

GCGCTCGGCTCCACCGACGGATTGAAGCGCAACCTGCTGGCCACCAACACCGAGCGTGCGATTT  
CGGTGCCGGTTGGGCCCGGGACGCTGGGCCGCATCATGGATGTGCTGGGTGCGCCGATCGACGA  
AGCCGGCGACGTGCAGGCCTCGGATCATTGGGAAATCCACCGCGCTGCGCCGTCGTACGAAGA  
CCAGTCGTCCAGCACCGAATTGCTGGAAACCGGCATCAAGGTGATCGACCTGATGTGCCCGTTC  
GCCAAGGGCGGCAAGGTCGGCCTGTTCCGGCGGCCGGCGTCCGGCAAGACCGTCAACATGATG  
GAACTGATCAACAACATCGCCAAGGCGCACTCGGGCCTGTCCGTGTTCCGGCGCTGGGTGAGC  
GTACCCGTGAGGGCAACGACTTCTACCACGAGATGAAGGACTCCAACGTCCTGGACAAGGTGCG  
CGATGGTGTACGGCCAGATGAACGAGCCGCCGGGCAACCGTCTGCGCGTTGCGCTGACCCGGCCT  
GACCATGGCCGAGTACTTCCGCGACGAGAAGGACGAGAACGGCAAGGGCAAGGACGTGCTGC  
TGTTTCGTGGACAACATCTACCGCTACACGCTGGCCGGTACCGAAGTGTCGCGCTGCTTGGCCG  
CATGCCGTCGGCG

*fjuA* (TonB-dependent receptor)

>XCHZ1

AACGTGGTCGACGCCAGCGGTGTGTCGCGCTCGCAGAACGGCCTGTACGCCTACGGCACGCCG  
TTCTGGGGCGATTGCTGCATACCCGCAGCTACGACGTGCGCTACGACGTCAACGCACCGTACG  
TGGCGCTACCTTCGACAGCGGCAAGCTCAGCATCGACGGCAGCCTGCGCTACGACATGGGCG  
ATGCGCGCGGCAACTATTCCGGCACCGCCATCGCGCAGAACCTGGACGTCAACGGCGATGGCGT  
GATCCAGCCGGTGGAGCAGCGGTGGCCACCGTGGACACCGCCAATGCGCGGCCAGTGGACTA  
CGACTGGAACCTGTCGTAATCATTGGGCGGCAATTACCTGATCAACGACGACCTGGGCGCA  
TTCGCACGCGTCAGCCGTGGCGCACGCGCAATGCCGACCGCCTGCTGTTCCGGCGTGATCCGCG  
ACGATGGCTCGGTGACCTCCGATGAAGCGGTCAACGTGGTGGCAGACCGCAAGCCGGCCTGA  
AGTGGCGCCGCGACGGCCTGAGCCTGTTTGCCACCGCGTTTGCCGCGCGCACCCAGGAGCAGA  
ACTTCGAAGTCAACAGCCAGCGCTTCTTCAACCGTAGCTACAAGGCGCACGGGATCGAGCTGGA  
AGCCAGTACCGCTACGAGGGCTTACCGTCAACGGCGGCGTGACCTGGACCGATGCAGAAAT

CGCCAGGGACCAGATCACTCCGGAGAACACCGGCAACGTGCCGCGCCGCCAAGCCGACTTCGT  
GTGGCAGCTC

>XCNS

AACGTGGTCGACGCCAGCGGTGTGTCGCGCTCGCAGAACGGCCTGTACGCCTACGGCACGCCG  
TTCTGGGGCGATTGCTGCATCACCCGCAGCTACGACGTGCGCTACGACGTCAACGCACCGTACG  
TGGCGCTACCTTCGACAGCGGCAAGCTCAGCATCGACGGCAGCCTGCGCTACGACATGGGCG  
ATGCGCGCGGCAACTATTCCGGCACCGCCATCGCGCAGAACCTGGACGTCAACGGCGATGGCGT  
GATCCAGCCGGTGGAGCAGCGGTGGCCACCGTGGACACCGCCAATGCGCGGCCAGTGGACTA  
CGACTGGAACCTGTCGTAATCATTGGGCGGCAATTACCTGATCAACGACGACCTGGGCGCA  
TTCGCACGCGTCAGCCGTGGCGCACGCGCAATGCCGACCGCCTGCTGTTTCGGCGTGATCCGCG  
ACGATGGCTCGGTGACCTCCGATGAAGCGGTCAACGTGGTGGCAGACACCGAAGCCGGCCTGA  
AGTGGCGCCGCGACGGCCTGAGCCTGTTTGCCACCGCGTTTGCCGCGCGCACCCAGGAGCAGA  
ACTTCGAAGTCAACAGCCAGCGCTTCTTCAACCGTAGCTACAAGGCGCACGGGATCGAGCTGGA  
AGCCAGCTACCGCTACGAGGGCTTACCGTCAACGGCGGCGTGACCTGGACCGATGCAGAAAT  
CGCCAGGGACCAGATCACTCCGGAGAACACCGGCAACGTGCCGCGCCGCCAAGCCGACTTCGT  
GTGGCAGCTC

>XCNJ

AACGTGGTCGACGCCAGCGGTGTGTCGCGCTCGCAGAACGGCCTGTACGCCTACGGCACGCCG  
TTCTGGGGCGATTGCTGCATCACCCGCAGCTACGACGTGCGCTACGACGTCAACGCACCGTACG  
TGTCGCTCACCTTCGACAGCGGCAAGCTCAGCATCGACGGCAGCCTGCGCTACGACATGGGCGA  
TGCGCGCGGCAACTATTCCGGCACCGCCATCGCGCAGAACCTGGACGTCAACGGCGATGGCGT  
GATCCAGCCGGTGGAGCAGCGGTGGCCACCGTGGACACCGCCAATGCGCGGCCAGTGGACTA  
CGACTGGAACCTGTCGTAATCATTGGGCGGCAATTACCTGATCAACGACGACCTGGGCGCA  
TTCGCACGCGTCAGCCGTGGCGCACGCGCAATGCCGACCGCCTGCTGTTTCGGCGTGATCCGCG  
ACGATGGCTCGGTGACCTCCGATGAAGCGGTCAACGTGGTGGCAGACACCGAAGCCGGCCTGA  
AGTGGCGCCGCGACGGCCTGAGCCTGTTTGCCACCGCGTTTGCCGCGCGCACCCAGGAGCAGA  
ACTTCGAAGTCAACAGCCAGCGCTTCTTCAACCGTAGCTACAAGGCGCACGGGATCGAGCTGGA  
AGCCAGCTACCGCTACGAGGGCTTACCGTCAACGGCGGCGTGACCTGGACCGATGCAGAAAT  
CGCCAGGGACCAGATCACTCCGGAGAACACCGGCAACGTGCCGCGCCGCCAAGCCGACTTCGT  
GTGGCAGCTC

>XCWL

AACGTGGTCGACGCCAGCGGTGTGTCGCGCTCGCAGAACGGCCTGTACGCCTACGGCACGCCG  
TTCTGGGGCGATTGCTGCATCACCCGCAGCTACGACGTGCGCTACGACGTCAACGCACCGTACG  
TGGCGCTACCTTCGACAGCGGCAAGCTCAGCATCGACGGCAGCCTGCGCTACGACATGGGCG  
ATGCGCGCGGCAACTATTCCGGCACCGCCATCGCGCAGAACCTGGACGTCAACGGCGATGGCGT  
GATCCAGCCGGTGGAGCAGCGGTGGCCACCGTGGACACCGCCAATGCGCGGCCAGTGGACTA  
CGACTGGAACCTGTCGTAATCATTGGGCGGCAATTACCTGATCAACGACGACCTGGGCGCA  
TTCGCACGCGTCAGCCGTGGCGCACGCGCAATGCCGACCGCCTGCTGTTTCGGCGTGATCCGCG  
ACGATGGCTCGGTGACCTCCGATGAAGCGGTCAACGTGGTGGCAGACACCGAAGCCGGCCTGA  
AGTGGCGCCGCGACGGCCTGAGCCTGTTTGCCACCGCGTTTGCCGCGCGCACCCAGGAGCAGA  
ACTTCGAAGTCAACAGCCAGCGCTTCTTCAACCGTAGCTACAAGGCGCACGGGATCGAGCTGGA  
AGCCAGCTACCGCTACGAGGGCTTACCGTCAACGGCGGCGTGACCTGGACCGATGCAGAAAT  
CGCCAGGGACCAGATCACTCCGGAGAACACCGGCAACGTGCCGCGCCGCCAAGCCGACTTCGT  
GTGGCAGCTC



>XCSD

AAcGTGGTCGACGCCAGCGGTGTGTCGCGCTCGCAGAACGGCCTGTACGCCTACGGCACGCCGT  
TCTGGGGCGATTGCTGCATCACCCGCAGCTACGACGTGCGCTACGACGTCAACGCACCGTACGT  
GGCGCTACCTTCGACAGCGGCAAGCTCAGCATCGACGGCAGCCTGCGCTACGACATGGGCGA  
TGCGCGCGGCAACTATTCCGGCACCGCCATCGCGCAGAACCTGGACGTCAACGGCGATGGCGT  
GATCCAGCCGGTGGAGCAGCGGTGGCCACCGTGGACACCGCCAATGCGCGGCCAGTGGACTA  
CGACTGGAACCTGTCGTA CTATTGGGCGGCAATTACCTGATCAACGACGACCTGGGCGCA  
TTCGCACGCGTCAGCCGTGGCGCACGCGCCAATGCCGACCGCCTGCTGTTTCGGCGTGATCCGCG  
ACGATGGCTCGGTGACCTCCGATGAAGCGGTCAACGTGGTGGCAGACAGACCGAAGCCGGCCTGA  
AGTGGCGCCGCGACGGCCTGAGCCTGTTTGCCACCGCGTTTGCCGCGCGCACCCAGGAGCAGA  
ACTTCGAAGTCAACGACCGCGCTTCTTCAACCGTAGCTACAAGGCGCACGGGATCGAGCTGGA  
AGCCAGCTACCGCTACGAGGGCTTACCGTCAACGGCGGCGTGACCTGGACCGATGCAGAAAT  
CGCCAGGGACCAGATCACTCCGAGAACACCGGCAACGTGCCGCGCCGCCAAGCCGACTTCGT  
GTGGCAGCTC

>XCJM

AAcGTGGTCGACGCCAGCGGTGTGTCGCGCTCGCAGAACGGCCTGTACGCCTACGGCACGCCGT  
TCTGGGGCGATTGCTGCATCACCCGCAGCTACGACGTGCGCTACGACGTCAACGCACCGTACGT  
GGCGCTACCTTCGACAGCGGCAAGCTCAGCATCGACGGCAGCCTGCGCTACGACATGGGCGA  
TGCGCGCGGCAACTATTCCGGCACCGCCATCGCGCAGAACCTGGACGTCAACGGCGATGGCGT  
GATCCAGCCGGTGGAGCAGCGGTGGCCACCGTGGACACCGCCAATGCGCGGCCAGTGGACTA  
CGACTGGAACCTGTCGTA CTATTGGGCGGCAATTACCTGATCAACGACGACCTGGGCGCA  
TTCGCACGCGTCAGCCGTGGCGCACGCGCCAATGCCGACCGCCTGCTGTTTCGGCGTGATCCGCG  
ACGATGGCTCGGTGACCTCCGATGAAGCGGTCAACGTGGTGGCAGACAGACCGAAGCCGGCCTGA  
AGTGGCGCCGCGACGGCCTGAGCCTGTTTGCCACCGCGTTTGCCGCGCGCACCCAGGAGCAGA  
ACTTCGAAGTCAACGACCGCGCTTCTTCAACCGTAGCTACAAGGCGCACGGGATCGAGCTGGA  
AGCCAGCTACCGCTACGAGGGCTTACCGTCAACGGCGGCGTGACCTGGACCGATGCAGAAAT  
CGCCAGGGACCAGATCACTCCGAGAACACCGGCAACGTGCCGCGCCGCCAAGCCGACTTCGT  
GTGGCAGCTC

>XCYL

AACGTGGTCGACGCCAGCGGTGTGTCGCGCTCGCAGAACGGCCTGTACGCCTACGGCACGCCG  
TTCTGGGGCGATTGCTGCATCACCCGCAGCTACGACGTGCGCTACGACGTCAACGCACCGTACG  
TGCGGCTACCTTCGACAGCGGCAAGCTCAGCATCGACGGCAGCCTGCGCTACGACATGGGCG  
ATGCGCGCGGCAACTATTCCGGCACCGCCATCGCGCAGAACCTGGACGTCAACGGCGATGGCGT  
GATCCAGCCGGTGGAGCAGCGGTGGCCACCGTGGACACCGCCAATGCGCGGCCAGTGGACTA  
CGACTGGAACCTGTCGTA CTATTGGGCGGCAATTACCTGATCAACGACGACCTGGGCGCA  
TTCGCACGCGTCAGCCGTGGCGCACGCGCCAATGCCGACCGCCTGCTGTTTCGGCGTGATCCGCG  
ACGATGGCTCGGTGACCTCCGATGAAGCGGTCAACGTGGTGGCAGACAGACCGAAGCCGGCCTGA  
AGTGGCGCCGCGACGGCCTGAGCCTGTTTGCCACCGCGTTTGCCGCGCGCACCCAGGAGCAGA  
ACTTCGAAGTCAACGACCGCGCTTCTTCAACCGTAGCTACAAGGCGCACGGGATCGAGCTGGA  
AGCCAGCTACCGCTACGAGGGCTTACCGTCAACGGCGGCGTGACCTGGACCGATGCAGAAAT  
CGCCAGGGACCAGATCACTCCGAGAACACCGGCAACGTGCCGCGCCGCCAAGCCGACTTCGT  
GTGGCAGCTC

>XCBS

AACGTGGTCGACGCCAGCGGTGTGTCGCGCTCGCAGAACGGCCTGTACGCCTACGGCACGCCG

TTCTGGGGCGATTGCTGCATCACCCGCAGCTACGACGTGCGCTACGACGTCAACGCACCGTACG  
TGGCGCTACCTTCGACAGCGGCAAGCTCAGCATCGACGGCAGCCTGCGCTACGACATGGGCG  
ATGCGCGCGGCAACTATTCCGGCACCGCCATCGCGCAGAACCTGGACGTCAACGGCGATGGCGT  
GATCCAGCCGGTGGAGCAGCGGTGGCCACCGTGGACACCGCCAATGCGCGGCCAGTGGACTA  
CGACTGGAACCTGTCGTAATCGGCGGCAATTACCTGATCAACGACGACCTGGGCGCA  
TTCGCACGCGTCAGCCGTGGCGCACGCGCAATGCCGACCGCCTGCTGTTCCGGCGTGATCCGCG  
ACGATGGCTCGGTGACCTCCGATGAAGCGGTCAACGTGGTGGCAGACACCGAAGCCGGCCTGA  
AGTGGCGCCGCGACGGCCTGAGCCTGTTTGCCACCGCGTTTGCCGCGCGCACCCAGGAGCAGA  
ACTTCGAAGTACCAGCCAGCGCTTCTTCAACCGTAGCTACAAGGCGCACGGGATCGAGCTGGA  
AGCCAGCTACCGCTACGAGGGCTTACCGTCAACGGCGGCGTGACCTGGACCGATGCAGAAAT  
CGCCAGGGACCAGATCACTCCGAGAACACCGGCAACGTGCCGCGCCGCAAGCCGACTTCGT  
GTGGCAGCTC

>XCJN

AACGTGGTCGACGCCAGCGGTGTGTCGCGCTCGCAGAACGGCCTGTACGCCTACGGCACGCCG  
TTCTGGGGCGATTGCTGCATCACCCGCAGCTACGACGTGCGCTACGACGTCAACGCACCGTACG  
TGGCGCTACCTTCGACAGCGGCAAGCTCAGCATCGACGGCAGCCTGCGCTACGACATGGGCG  
ATGCGCGCGGCAACTATTCCGGCACCGCCATCGCGCAGAACCTGGACGTCAACGGCGATGGCGT  
GATCCAGCCGGTGGAGCAGCGGTGGCCACCGTGGACACCGCCAATGCGCGGCCAGTGGACTA  
CGACTGGAACCTGTCGTAATCGGCGGCAATTACCTGATCAACGACGACCTGGGCGCA  
TTCGCACGCGTCAGCCGTGGCGCACGCGCAATGCCGACCGCCTGCTGTTCCGGCGTGATCCGCG  
ACGATGGCTCGGTGACCTCCGATGAAGCGGTCAACGTGGTGGCAGACACCGAAGCCGGCCTGA  
AGTGGCGCCGCGACGGCCTGAGCCTGTTTGCCACCGCGTTTGCCGCGCGCACCCAGGAGCAGA  
ACTTCGAAGTACCAGCCAGCGCTTCTTCAACCGTAGCTACAAGGCGCACGGGATCGAGCTGGA  
AGCCAGCTACCGCTACGAGGGCTTACCGTCAACGGCGGCGTGACCTGGACCGATGCAGAAAT  
CGCCAGGGACCAGATCACTCCGAGAACACCGGCAACGTGCCGCGCCGCAAGCCGACTTCGT  
GTGGCAGCTC

>XCCW

AACGTGGTCGACGCCAGCGGTGTGTCGCGCTCGCAGAACGGCCTGTACGCCTACGGCACGCCG  
TTCTGGGGCGATTGCTGCATCACCCGCAGCTACGACGTGCGCTACGACGTCAACGCACCGTACG  
TGGCGCTACCTTCGACAGCGGCAAGCTCAGCATCGACGGCAGCCTGCGCTACGACATGGGCG  
ATGCGCGCGGCAACTATTCCGGCACCGCCATCGCGCAGAACCTGGACGTCAACGGCGATGGCGT  
GATCCAGCCGGTGGAGCAGCGGTGGCCACCGTGGACACCGCCAATGCGCGGCCAGTGGACTA  
CGACTGGAACCTGTCGTAATCGGCGGCAATTACCTGATCAACGACGACCTGGGCGCA  
TTCGCACGCGTCAGCCGTGGCGCACGCGCAATGCCGACCGCCTGCTGTTCCGGCGTGATCCGCG  
ACGATGGCTCGGTGACCTCCGATGAAGCGGTCAACGTGGTGGCAGACACCGAAGCCGGCCTGA  
AGTGGCGCCGCGACGGCCTGAGCCTGTTTGCCACCGCGTTTGCCGCGCGCACCCAGGAGCAGA  
ACTTCGAAGTACCAGCCAGCGCTTCTTCAACCGTAGCTACAAGGCGCACGGGATCGAGCTGGA  
AGCCAGCTACCGCTACGAGGGCTTACCGTCAACGGCGGCGTGACCTGGACCGATGCAGAAAT  
CGCCAGGGACCAGATCACTCCGAGAACACCGGCAACGTGCCGCGCCGCAAGCCGACTTCGT  
GTGGCAGCTC

>XCWH1

AACGTGGTCGACGCCAGCGGTGTGTCGCGCTCGCAGAACGGCCTGTACGCCTACGGCACGCCG  
TTCTGGGGCGATTGCTGCATCACCCGCAGCTACGACGTGCGCTACGACGTCAACGCACCGTACG  
TGGCGCTACCTTCGACAGCGGCAAGCTCAGCATCGACGGCAGCCTGCGCTACGACATGGGCG

ATGCGCGGGCAACTATTCCGGCACCGCCATCGCGCAGAACCTGGACGTCAACGGCGATGGCGT  
GATCCAGCCGGTGGAGCAGCGCGTGGCCACCGTGGACACCGCCAATGCGCGGCCAGTGGACTA  
CGACTGGAACCTGTCGTA CTATTGGGCGGCAATTACCTGATCAACGACGACCTGGGCGCA  
TTCGCACGCGTCAGCCGTGGCGCACGCGCAATGCCGACCGCCTGCTGTTCCGGCGTGATCCGCG  
ACGATGGCTCGGTGACCTCCGATGAAGCGGTCAACGTGGTGGCAGACACCGAAGCCGGCCTGA  
AGTGGCGCCGCGACGGCCTGAGCCTGTTTGCCACCGCGTTTGCCGCGCGCACCCAGGAGCAGA  
ACTTCGAAGTCAACAGCCAGCGCTTCTTCAACCGTAGCTACAAGGCGCACGGGATCGAGCTGGA  
AGCCAGCTACCGCTACGAGGGCTTACCGTCAACGGCGGCGTGACCTGGACCGATGCAGAAAT  
CGCCAGGGACCAGATCACTCCGGAGAACACCGGCAACGTGCCGCGCCGCCAAGCCGACTTCGT  
GTGGCAGCTC

>XCWH2

AACGTGGTCGACGCCAGCGGTGTGTCGCGCTCGCAGAACGGCCTGTACGCCTACGGCACGCCC  
TTCTGGGGCGATTGCTGCATCACCCGCAGCTACGACGTGCGCTACGACGTCAACGCACCGTACG  
TGGCGCTACCTTCGACAGCGGCAAGCTCAGCATCGACGGCAGCCTGCGCTACGACATGGGCG  
ATGCGCGGGCAACTATTCCGGCACCGCCATCGCGCAGAACCTGGACGTCAACGGCGATGGCGT  
GATCCAGCCGGTGGAGCAGCGCGTGGCCACCGTGGACACCGCCAATGCGCGGCCAGTGGACTA  
CGACTGGAACCTGTCGTA CTATTGGGCGGCAATTACCTGATCAACGACGACCTGGGCGCA  
TTCGCACGCGTCAGCCGTGGCGCACGCGCAATGCCGACCGCCTGCTGTTCCGGCGTGATCCGCG  
ACGATGGCTCGGTGACCTCCGATGAAGCGGTCAACGTGGTGGCAGACACCGAAGCCGGCCTGA  
AGTGGCGCCGCGACGGCCTGAGCCTGTTTGCCACCGCGTTTGCCGCGCGCACCCAGGAGCAGA  
ACTTCGAAGTCAACAGCCAGCGCTTCTTCAACCGTAGCTACAAGGCGCACGGGATCGAGCTGGA  
AGCCAGCTACCGCTACGAGGGCTTACCGTCAACGGCGGCGTGACCTGGACCGATGCAGAAAT  
CGCCAGGGACCAGATCACTCCGGAGAACACCGGCAACGTGCCGCGCCGCCAAGCCGACTTCGT  
GTGGCAGCTC

>XCDX1

AACGTGGTCGACGCCAGCGGTGTGTCGCGCTCGCAGAACGGCCTGTACGCCTACGGCACGCCC  
TTCTGGGGCGATTGCTGCATCACCCGCAGCTACGACGTGCGCTACGACGTCAACGCACCGTACG  
TGGCGCTACCTTCGACAGCGGCAAGCTCAGCATCGACGGCAGCCTGCGCTACGACATGGGCG  
ATGCGCGGGCAACTATTCCGGCACCGCCATCGCGCAGAACCTGGACGTCAACGGCGATGGCGT  
GATCCAGCCGGTGGAGCAGCGCGTGGCCACCGTGGACACCGCCAATGCGCGGCCAGTGGACTA  
CGACTGGAACCTGTCGTA CTATTGGGCGGCAATTACCTGATCAACGACGACCTGGGCGCA  
TTCGCACGCGTCAGCCGTGGCGCACGCGCAATGCCGACCGCCTGCTGTTCCGGCGTGATCCGCG  
ACGATGGCTCGGTGACCTCCGATGAAGCGGTCAACGTGGTGGCAGACACCGAAGCCGGCCTGA  
AGTGGCGCCGCGACGGCCTGAGCCTGTTTGCCACCGCGTTTGCCGCGCGCACCCAGGAGCAGA  
ACTTCGAAGTCAACAGCCAGCGCTTCTTCAACCGTAGCTACAAGGCGCACGGGATCGAGCTGGA  
AGCCAGCTACCGCTACGAGGGCTTACCGTCAACGGCGGCGTGACCTGGACCGATGCAGAAAT  
CGCCAGGGACCAGATCACTCCGGAGAACACCGGCAACGTGCCGCGCCGCCAAGCCGACTTCGT  
GTGGCAGCTC

>XCDX2

AACGTGGTCGACGCCAGCGGTGTGTCGCGCTCGCAGAACGGCCTGTACGCCTACGGCACGCCC  
TTCTGGGGCGATTGCTGCATCACCCGCAGCTACGACGTGCGCTACGACGTCAACGCACCGTACG  
TGGCGCTACCTTCGACAGCGGCAAGCTCAGCATCGACGGCAGCCTGCGCTACGACATGGGCG  
ATGCGCGGGCAACTATTCCGGCACCGCCATCGCGCAGAACCTGGACGTCAACGGCGATGGCGT  
GATCCAGCCGGTGGAGCAGCGCGTGGCCACCGTGGACACCGCCAATGCGCGGCCAGTGGACTA

CGACTGGAACCTACCTGTCGTA CTCAATTGGGCGGCAATTACCTGATCAACGACGACCTGGGCGCA  
TTCGCACGCGTCAGCCGTGGCGCACGCGCAATGCCGACCGCCTGCTGTTTCGGCGTGATCCGCG  
ACGATGGCTCGGTGACCTCCGATGAAGCGGTCAACGTGGTGGCAGACAGACCGAAGCCGGCCTGA  
AGTGGCGCCGCGACGGCCTGAGCCTGTTTGCCACCGGTTTGCCGCGCGCACCCAGGAGCAGA  
ACTTCGAAGTCACCAGCCAGCGCTTCTTCAACCGTAGCTACAAGGCGCACGGGATCGAGCTGGA  
AGCCAGCTACCGCTACGAGGGCTTACCGTCAACGGCGGCGTGACCTGGACCGATGCAGAAAT  
CGCCAGGGACCAGATCACTCCGAGAACACCGGCAACGTGCCGCGCCGCAAGCCGACTTCGT  
GTGGCAGCTC

>XCDX3

AACGTGGTCGACGCCAGCGGTGTGTCGCGCTCGCAGAACGGCCTGTACGCCTACGGCACGCCG  
TTCTGGGGCGATTGCTGCATCACCCGACGCTACGACGTGCGCTACGACGTCAACGCACCGTACG  
TGGCGCTACCTTCGACAGCGGCAAGCTCAGCATCGACGGCAGCCTGCGCTACGACATGGGCG  
ATGCGCGCGGCAACTATTCCGGCACCGCCATCGCGCAGAACCTGGACGTCAACGGCGATGGCGT  
GATCCAGCCGGTGGAGCAGCGGTGGCCACCGTGGACACCGCCAATGCGCGGCCAGTGGACTA  
CGACTGGAACCTACCTGTCGTA CTCAATTGGGCGGCAATTACCTGATCAACGACGACCTGGGCGCA  
TTCGCACGCGTCAGCCGTGGCGCACGCGCAATGCCGACCGCCTGCTGTTTCGGCGTGATCCGCG  
ACGATGGCTCGGTGACCTCCGATGAAGCGGTCAACGTGGTGGCAGACAGACCGAAGCCGGCCTGA  
AGTGGCGCCGCGACGGCCTGAGCCTGTTTGCCACCGGTTTGCCGCGCGCACCCAGGAGCAGA  
ACTTCGAAGTCACCAGCCAGCGCTTCTTCAACCGTAGCTACAAGGCGCACGGGATCGAGCTGGA  
AGCCAGCTACCGCTACGAGGGCTTACCGTCAACGGCGGCGTGACCTGGACCGATGCAGAAAT  
CGCCAGGGACCAGATCACTCCGAGAACACCGGCAACGTGCCGCGCCGCAAGCCGACTTCGT  
GTGGCAGCTC

>XCTG

AATGTGGTCGACGCCAGCGGTGTGTCGCGCTCGCAGAACGGCCTGTACGCCTACGGCACGCCG  
TCTGGGGCGATTGCTGCATCACCCGACGCTACGACGTGCGCTACGACGTCAACGCACCGTACGT  
GGCGCTACCTTCGACAGCGGCAAGCTCAGCATCGACGGCAGCCTGCGCTACGACATGGGCGA  
TGCGCGCGGCAACTATTCCGGCACCGCCATCGCGCAGAACCTGGACGTCAACGGCGATGGCGT  
GATCCAGCCGGTGGAGCAGCGGTGGCCACCGTGGACACCGCCAATGCGCGGCCAGTGGACTA  
CGACTGGAACCTACCTGTCGTA CTCAATTGGGCGGCAATTACCTGATCAACGACGACCTGGGCGCA  
TTCGCACGCGTCAGCCGTGGCGCACGCGCAATGCCGACCGCCTGCTGTTTCGGCGTGATCCGCG  
ACGATGGCTCGGTGACCTCCGATGAAGCGGTCAACGTGGTGGCAGACAGACCGAAGCCGGCCTGA  
AGTGGCGCCGCGACGGCCTGAGCCTGTTTGCCACCGGTTTGCCGCGCGCACCCAGGAGCAGA  
ACTTCGAAGTCACCAGCCAGCGCTTCTTCAACCGTAGCTACAAGGCGCACGGGATCGAGCTGGA  
AGCCAGCTACCGCTACGAGGGCTTACCGTCAACGGCGGCGTGACCTGGACCGATGCAGAAAT  
CGCCAGGGACCAGATCACTCCGAGAACACCGGCAACGTGCCGCGCCGCAAGCCGACTTCGT  
GTGGCAGCTC

>XCAW1

AACGTGGTCGACGCCAGCGGTGTGTCGCGCTCGCAGAACGGCCTGTACGCCTACGGCACGCCG  
TTCTGGGGCGATTGCTGCATCACCCGACGCTACGACGTGCGCTACGACGTCAACGCACCGTACG  
TGGCGCTACCTTCGACAGCGGCAAGCTCAGCATCGACGGCAGCCTGCGCTACGACATGGGCG  
ATGCGCGCGGCAACTATTCCGGCACCGCCATCGCGCAGAACCTGGACGTCAACGGCGATGGCGT  
GATCCAGCCGGTGGAGCAGCGGTGGCCACCGTGGACACCGCCAATGCGCGGCCAGTGGACTA  
CGACTGGAACCTACCTGTCGTA CTCAATTGGGCGGCAATTACCTGATCAACGACGACCTGGGCGCA  
TTCGCACGCGTCAGCCGTGGCGCACGCGCAATGCCGACCGCCTGCTGTTTCGGCGTGATCCGCG

ACGATGGCTCGGTGACCTCCGATGAAGCGGTCAACGTGGTGGCAGACACCGAAGCCGGCCTGA  
AGTGGCGCCGCGACGGCCTGAGCCTGTTTGCCACCGCGTTTGCCGCGCGCACCCAGGAGCAGA  
ACTTCGAAGTCAACCAGCCAGCGCTTCTTCAACCGTAGCTACAAGGCGCACGGGATCGAGCTGGA  
AGCCAGCTACCGCTACGAGGGCTTACCGTCAACGGCGGCGTGACCTGGACCGATGCAGAAAT  
CGCCAGGGACCAGATCACTCCGGAGAACACCGGCAACGTGCCGCGCCGCCAAGCCGACTTCGT  
GTGGCAGCTC

>XCYQ1

AACGTGGTCGACGCCAGCGGTGTGTGCGCTCGCAGAACGGCCTGTACGCCTACGGCACGCCG  
TTCTGGGGCGATTGCTGCATCACCCGCAGCTACGACGTGCGCTACGACGTCAACGCACCGTACG  
TGGCGCTACCTTCGACAGCGGCAAGCTCAGCATCGACGGCAGCCTGCGCTACGACATGGGCG  
ATGCGCGCGGCAACTATTCCGGCACCGCCATCGCGCAGAACCTGGACGTCAACGGCGATGGCGT  
GATCCAGCCGGTGGAGCAGCGGTGGCCACCGTGGACACCGCCAATGCGCGGCCAGTGGACTA  
CGACTGGAACCTGTCGTA CTACTATTGGGCGGCAATTACCTGATCAACGACGACCTGGGCGCA  
TTCGCACGCGTCAGCCGTGGCGCACGCGCAATGCCGACCGCCTGCTGTTTCGGCGTGATCCGCG  
ACGATGGCTCGGTGACCTCCGATGAAGCGGTCAACGTGGTGGCAGACACCGAAGCCGGCCTGA  
AGTGGCGCCGCGACGGCCTGAGCCTGTTTGCCACCGCGTTTGCCGCGCGCACCCAGGAGCAGA  
ACTTCGAAGTCAACCAGCCAGCGCTTCTTCAACCGTAGCTACAAGGCGCACGGGATCGAGCTGGA  
AGCCAGCTACCGCTACGAGGGCTTACCGTCAACGGCGGCGTGACCTGGACCGATGCAGAAAT  
CGCCAGGGACCAGATCACTCCGGAGAACACCGGCAACGTGCCGCGCCGCCAAGCCGACTTCGT  
GTGGCAGCTC

>XCYQ2

AACGTGGTCGACGCCAGCGGTGTGTGCGCTCGCAGAACGGCCTGTACGCCTACGGCACGCCG  
TTCTGGGGCGATTGCTGCATCACCCGCAGCTACGACGTGCGCTACGACGTCAACGCACCGTACG  
TGGCGCTACCTTCGACAGCGGCAAGCTCAGCATCGACGGCAGCCTGCGCTACGACATGGGCG  
ATGCGCGCGGCAACTATTCCGGCACCGCCATCGCGCAGAACCTGGACGTCAACGGCGATGGCGT  
GATCCAGCCGGTGGAGCAGCGGTGGCCACCGTGGACACCGCCAATGCGCGGCCAGTGGACTA  
CGACTGGAACCTGTCGTA CTACTATTGGGCGGCAATTACCTGATCAACGACGACCTGGGCGCA  
TTCGCACGCGTCAGCCGTGGCGCACGCGCAATGCCGACCGCCTGCTGTTTCGGCGTGATCCGCG  
ACGATGGCTCGGTGACCTCCGATGAAGCGGTCAACGTGGTGGCAGACACCGAAGCCGGCCTGA  
AGTGGCGCCGCGACGGCCTGAGCCTGTTTGCCACCGCGTTTGCCGCGCGCACCCAGGAGCAGA  
ACTTCGAAGTCAACCAGCCAGCGCTTCTTCAACCGTAGCTACAAGGCGCACGGGATCGAGCTGGA  
AGCCAGCTACCGCTACGAGGGCTTACCGTCAACGGCGGCGTGACCTGGACCGATGCAGAAAT  
CGCCAGGGACCAGATCACTCCGGAGAACACCGGCAACGTGCCGCGCCGCCAAGCCGACTTCGT  
GTGGCAGCTC

>XCYQ3

AACGTGGTCGACGCCAGCGGTGTGTGCGCTCGCAGAACGGCCTGTACGCCTACGGCACGCCG  
TTCTGGGGCGATTGCTGCATCACCCGCAGCTACGACGTGCGCTACGACGTCAACGCACCGTACG  
TGGCGCTACCTTCGACAGCGGCAAGCTCAGCATCGACGGCAGCCTGCGCTACGACATGGGCG  
ATGCGCGCGGCAACTATTCCGGCACCGCCATCGCGCAGAACCTGGACGTCAACGGCGATGGCGT  
GATCCAGCCGGTGGAGCAGCGGTGGCCACCGTGGACACCGCCAATGCGCGGCCAGTGGACTA  
CGACTGGAACCTGTCGTA CTACTATTGGGCGGCAATTACCTGATCAACGACGACCTGGGCGCA  
TTCGCACGCGTCAGCCGTGGCGCACGCGCAATGCCGACCGCCTGCTGTTTCGGCGTGATCCGCG  
ACGATGGCTCGGTGACCTCCGATGAAGCGGTCAACGTGGTGGCAGACACCGAAGCCGGCCTGA  
AGTGGCGCCGCGACGGCCTGAGCCTGTTTGCCACCGCGTTTGCCGCGCGCACCCAGGAGCAGA

ACTTCGAAGTCACCAGCCAGCGCTTCTTCAACCGTAGCTACAAGGCGCACGGGATCGAGCTGGA  
AGCCAGCTACCGCTACGAGGGCTTACCGTCAACGGCGGCGTGACCTGGACCGATGCAGAAAT  
CGCCAGGGACCAGATCACTCCGAGAACACCGGCAACGTGCCGCGCCGCCAAGCCGACTTCGT  
GTGGCAGCTC

>XCGY1

AACGTGGTCGACGCCAGCGGTGTGTGCGGCTCGCAGAACGGCCTGTACGCCTACGGCACGCCC  
TTCTGGGGCGATTGCTGCATACCCGCAGCTACGACGTGCGCTACGACGTCAACGCACCGTACG  
TGGCGCTACCTTCGACAGCGGCAAGCTCAGCATCGACGGCAGCCTGCGCTACGACATGGGCG  
ATGCGCGCGCAACTATTCCGGCACCGCCATCGCGCAGAACCTGGACGTCAACGGCGATGGCGT  
GATCCAGCCGGTGGAGCAGCGGTGGCCACCGTGGACACCGCCAATGCGCGGCCAGTGGACTA  
CGACTGGAACCTGTCGTACTIONATTGGGCGGCAATTACCTGATCAACGACGACCTGGGCGCA  
TTCGCACGCGTCAGCCGTGGCGCACGCGCAATGCCGACCGCCTGCTGTTCCGGCGTGATCCGCG  
ACGATGGCTCGGTGACCTCCGATGAAGCGGTCAACGTGGTGGCAGACACCGAAGCCGGCCTGA  
AGTGGCGCCGCGACGGCCTGAGCCTGTTTGCCACCGGTTTGCCGCGCGCACCCAGGAGCAGA  
ACTTCGAAGTCACCAGCCAGCGCTTCTTCAACCGTAGCTACAAGGCGCACGGGATCGAGCTGGA  
AGCCAGCTACCGCTACGAGGGCTTACCGTCAACGGCGGCGTGACCTGGACCGATGCAGAAAT  
CGCCAGGGACCAGATCACTCCGAGAACACCGGCAACGTGCCGCGCCGCCAAGCCGACTTCGT  
GTGGCAGCTC

>XCGY2

AACGTGGTCGACGCCAGCGGTGTGTGCGGCTCGCAGAACGGCCTGTACGCCTACGGCACGCCC  
TTCTGGGGCGATTGCTGCATACCCGCAGCTACGACGTGCGCTACGACGTCAACGCACCGTACG  
TGGCGCTACCTTCGACAGCGGCAAGCTCAGCATCGACGGCAGCCTGCGCTACGACATGGGCG  
ATGCGCGCGCAACTATTCCGGCACCGCCATCGCGCAGAACCTGGACGTCAACGGCGATGGCGT  
GATCCAGCCGGTGGAGCAGCGGTGGCCACCGTGGACACCGCCAATGCGCGGCCAGTGGACTA  
CGACTGGAACCTGTCGTACTIONATTGGGCGGCAATTACCTGATCAACGACGACCTGGGCGCA  
TTCGCACGCGTCAGCCGTGGCGCACGCGCAATGCCGACCGCCTGCTGTTCCGGCGTGATCCGCG  
ACGATGGCTCGGTGACCTCCGATGAAGCGGTCAACGTGGTGGCAGACACCGAAGCCGGCCTGA  
AGTGGCGCCGCGACGGCCTGAGCCTGTTTGCCACCGGTTTGCCGCGCGCACCCAGGAGCAGA  
ACTTCGAAGTCACCAGCCAGCGCTTCTTCAACCGTAGCTACAAGGCGCACGGGATCGAGCTGGA  
AGCCAGCTACCGCTACGAGGGCTTACCGTCAACGGCGGCGTGACCTGGACCGATGCAGAAAT  
CGCCAGGGACCAGATCACTCCGAGAACACCGGCAACGTGCCGCGCCGCCAAGCCGACTTCGT  
GTGGCAGCTC

>XCGY3

AATGTGGTCGACGCCAGCGGTGTGTGCGGCTCGCAGAACGGCCTGTACGCCTACGGCACGCCC  
TCTGGGGCGATTGCTGCATACCCGCAGCTACGACGTGCGCTACGACGTCAACGCACCGTACGT  
GGCGCTACCTTCGACAGCGGCAAGCTCAGCATCGACGGCAGCCTGCGCTACGACATGGGCGA  
TGCGCGCGGCAACTATTCCGGCACCGCCATCGCGCAGAACCTGGACGTCAACGGCGATGGCGT  
GATCCAGCCGGTGGAGCAGCGGTGGCCACCGTGGACACCGCCAATGCGCGGCCAGTGGACTA  
CGACTGGAACCTGTCGTACTIONATTGGGCGGCAATTACCTGATCAACGACGACCTGGGCGCA  
TTCGCACGCGTCAGCCGTGGCGCACGCGCAATGCCGACCGCCTGCTGTTCCGGCGTGATCCGCG  
ACGATGGCTCGGTGACCTCCGATGAAGCGGTCAACGTGGTGGCAGACACCGAAGCCGGCCTGA  
AGTGGCGCCGCGACGGCCTGAGCCTGTTTGCCACCGGTTTGCCGCGCGCACCCAGGAGCAGA  
ACTTCGAAGTCACCAGCCAGCGCTTCTTCAACCGTAGCTACAAGGCGCACGGGATCGAGCTGGA  
AGCCAGCTACCGCTACGAGGGCTTACCGTCAACGGCGGCGTGACCTGGACCGATGCAGAAAT

CGCCAGGGACCAGATCACTCCGGAGAACACCGGCAACGTGCCGCGCCGCCAAGCCGACTTCGT  
GTGGCAGCTC

>XCC1

AACGTGGTCGACGCCGAGGCGTGTGTCGCGCTCGCAGAACGGCCTGTACGCCTACGGCACGCCG  
TTCTGGGGCGATTGCTGCATCACCCGCAGCTACGACGTGCGCTACGACGTCAACGCACCGTACG  
TGTCGCTCACCTTCGACAGCGGCAAGCTCAGCATCGACGGCAGCCTGCGCTACGACATGGGCGA  
TGCGCGCGGCAACTATTCCGGCACCGCCATCGCGCAGAACCTGGACGTCAACGGCGATGGCGT  
GATCCAGCCGGTGGAGCAGCGGTGGCCACCGTGGACACCGCCAATGCGCGGCCAGTGGACTA  
CGACTGGAACCTGTCGTAATCATTGGGCGGCAATTACCTGATCAACGACGACCTGGGCGCA  
TTCGCACGCGTCAGCCGTGGCGCACGCGCAATGCCGACCGCCTGCTGTTTCGGCGTGATCCGCG  
ACGATGGCTCGGTGACCTCCGATGAAGCGGTCAACGTGGTGGCAGACACCGAAGCCGGCCTGA  
AGTGGCGCCGCGACGGCCTGAGCCTGTTTGCCACCGCGTTTGCCGCGCGCACCCAGGAGCAGA  
ACTTCGAAGTACCAGCCAGCGCTTCTTCAACCGTAGCTACAAGGCGCACGGGATCGAGCTGGA  
AGCCAGCTACCGCTACGAGGGCTTACCGTCAACGGCGGCGTGACCTGGACCGATGCAGAAAT  
CGCCAGGGACCAGATCACTCCGGAGAACACCGGCAACGTGCCGCGCCGCCAAGCCGACTTCGT  
GTGGCAGCTC

>XCC2

AACGTGGTCGACGCCAGCGGTGTGTCGCGCTCGCAGAACGGCCTGTACGCCTACGGCACGCCG  
TTCTGGGGCGATTGCTGCATCACCCGCAGCTACGACGTGCGCTACGACGTCAACGCACCGTACG  
TGGCGCTCACCTTCGACAGCGGCAAGCTCAGCATCGACGGCAGCCTGCGCTACGACATGGGCG  
ATGCGCGCGGCAACTATTCCGGCACCGCCATCGCGCAGAACCTGGACGTCAACGGCGATGGCGT  
GATCCAGCCGGTGGAGCAGCGGTGGCCACCGTGGACACCGCCAATGCGCGGCCAGTGGACTA  
CGACTGGAACCTGTCGTAATCATTGGGCGGCAATTACCTGATCAACGACGACCTGGGCGCA  
TTCGCACGCGTCAGCCGTGGCGCACGCGCAATGCCGACCGCCTGCTGTTTCGGCGTGATCCGCG  
ACGATGGCTCGGTGACCTCCGATGAAGCGGTCAACGTGGTGGCAGACACCGAAGCCGGCCTGA  
AGTGGCGCCGCGACGGCCTGAGCCTGTTTGCCACCGCGTTTGCCGCGCGCACCCAGGAGCAGA  
ACTTCGAAGTACCAGCCAGCGCTTCTTCAACCGTAGCTACAAGGCGCACGGGATCGAGCTGGA  
AGCCAGCTACCGCTACGAGGGCTTACCGTCAACGGCGGCGTGACCTGGACCGATGCAGAAAT  
CGCCAGGGACCAGATCACTCCGGAGAACACCGGCAACGTGCCGCGCCGCCAAGCCGACTTCGT  
GTGGCAGCTC

>XCZB1

AACGTGGTCGACGCCAGCGGTGTGTCGCGCTCGCAGAACGGCCTGTACGCCTACGGCACGCCG  
TTCTGGGGCGATTGCTGCATCACCCGCAGCTACGACGTGCGCTACGACGTCAACGCACCGTACG  
TGGCGCTCACCTTCGACAGCGGCAAGCTCAGCATCGACGGCAGCCTGCGCTACGACATGGGCG  
ATGCGCGCGGCAACTATTCCGGCACCGCCATCGCGCAGAACCTGGACGTCAACGGCGATGGCGT  
GATCCAGCCGGTGGAGCAGCGGTGGCCACCGTGGACACCGCCAATGCGCGGCCAGTGGACTA  
CGACTGGAACCTGTCGTAATCATTGGGCGGCAATTACCTGATCAACGACGACCTGGGCGCA  
TTCGCACGCGTCAGCCGTGGCGCACGCGCAATGCCGACCGCCTGCTGTTTCGGCGTGATCCGCG  
ACGATGGCTCGGTGACCTCCGATGAAGCGGTCAACGTGGTGGCAGACACCGAAGCCGGCCTGA  
AGTGGCGCCGCGACGGCCTGAGCCTGTTTGCCACCGCGTTTGCCGCGCGCACCCAGGAGCAGA  
ACTTCGAAGTACCAGCCAGCGCTTCTTCAACCGTAGCTACAAGGCGCACGGGATCGAGCTGGA  
AGCCAGCTACCGCTACGAGGGCTTACCGTCAACGGCGGCGTGACCTGGACCGATGCAGAAAT  
CGCCAGGGACCAGATCACTCCGGAGAACACCGGCAACGTGCCGCGCCGCCAAGCCGACTTCGT  
GTGGCAGCTC

>XCZB2

AACGTGGTCGACGCCAGCGGTGTGTCGCGCTCGCAGAACGGCCTGTACGCCTACGGCACGCCG  
TTCTGGGGCGATTGCTGCATACCCGCAGCTACGACGTGCGCTACGACGTCAACGCACCGTACG  
TGGCGCTACCTTCGACAGCGGCAAGCTCAGCATCGACGGCAGCCTGCGCTACGACATGGGCG  
ATGCGCGCGGCAACTATTCCGGCACCGCCATCGCGCAGAACCTGGACGTCAACGGCGATGGCGT  
GATCCAGCCGGTGGAGCAGCGGTGGCCACCGTGGACACCGCCAATGCGCGGCCAGTGGACTA  
CGACTGGAACCTGTCGTACTIONATTGGGCGGCAATTACCTGATCAACGACGACCTGGGCGCA  
TTCGCACGCGTCAGCCGTGGCGCACGCGCCAATGCCGACCGCCTGCTGTTTCGGCGTGATCCGCG  
ACGATGGCTCGGTGACCTCCGATGAAGCGGTCAACGTGGTGGCAGACAGACCGAAGCCGGCCTGA  
AGTGGCGCCGCGACGGCCTGAGCCTGTTTGCCACCGCGTTTGCCGCGCGCACCCAGGAGCAGA  
ACTTCGAAGTACCAGCCAGCGCTTCTTCAACCGTAGCTACAAGGCGCACGGGATCGAGCTGGA  
AGCCAGCTACCGCTACGAGGGCTTACCGTCAACGGCGGCGTGACCTGGACCGATGCAGAAAT  
CGCCAGGGACCAGATCACTCCGAGAACACCGGCAACGTGCCGCGCCGCCAAGCCGACTTCGT  
GTGGCAGCTC

>XCZB3

AACGTGGTCGACGCCAGCGGTGTGTCGCGCTCGCAGAACGGCCTGTACGCCTACGGCACGCCG  
TTCTGGGGCGATTGCTGCATACCCGCAGCTACGACGTGCGCTACGACGTCAACGCACCGTACG  
TGGCGCTACCTTCGACAGCGGCAAGCTCAGCATCGACGGCAGCCTGCGCTACGACATGGGCG  
ATGCGCGCGGCAACTATTCCGGCACCGCCATCGCGCAGAACCTGGACGTCAACGGCGATGGCGT  
GATCCAGCCGGTGGAGCAGCGGTGGCCACCGTGGACACCGCCAATGCGCGGCCAGTGGACTA  
CGACTGGAACCTGTCGTACTIONATTGGGCGGCAATTACCTGATCAACGACGACCTGGGCGCA  
TTCGCACGCGTCAGCCGTGGCGCACGCGCCAATGCCGACCGCCTGCTGTTTCGGCGTGATCCGCG  
ACGATGGCTCGGTGACCTCCGATGAAGCGGTCAACGTGGTGGCAGACAGACCGAAGCCGGCCTGA  
AGTGGCGCCGCGACGGCCTGAGCCTGTTTGCCACCGCGTTTGCCGCGCGCACCCAGGAGCAGA  
ACTTCGAAGTACCAGCCAGCGCTTCTTCAACCGTAGCTACAAGGCGCACGGGATCGAGCTGGA  
AGCCAGCTACCGCTACGAGGGCTTACCGTCAACGGCGGCGTGACCTGGACCGATGCAGAAAT  
CGCCAGGGACCAGATCACTCCGAGAACACCGGCAACGTGCCGCGCCGCCAAGCCGACTTCGT  
GTGGCAGCTC

>XCGZ1

AACGTGGTCGACGCCAGCGGTGTGTCGCGCTCGCAGAACGGCCTGTACGCCTACGGCACGCCG  
TTCTGGGGCGATTGCTGCATACCCGCAGCTACGACGTGCGCTACGACGTCAACGCACCGTACG  
TGGCGCTACCTTCGACAGCGGCAAGCTCAGCATCGACGGCAGCCTGCGCTACGACATGGGCG  
ATGCGCGCGGCAACTATTCCGGCACCGCCATCGCGCAGAACCTGGACGTCAACGGCGATGGCGT  
GATCCAGCCGGTGGAGCAGCGGTGGCCACCGTGGACACCGCCAATGCGCGGCCAGTGGACTA  
CGACTGGAACCTGTCGTACTIONATTGGGCGGCAATTACCTGATCAACGACGACCTGGGCGCA  
TTCGCACGCGTCAGCCGTGGCGCACGCGCCAATGCCGACCGCCTGCTGTTTCGGCGTGATCCGCG  
ACGATGGCTCGGTGACCTCCGATGAAGCGGTCAACGTGGTGGCAGACAGACCGAAGCCGGCCTGA  
AGTGGCGCCGCGACGGCCTGAGCCTGTTTGCCACCGCGTTTGCCGCGCGCACCCAGGAGCAGA  
ACTTCGAAGTACCAGCCAGCGCTTCTTCAACCGTAGCTACAAGGCGCACGGGATCGAGCTGGA  
AGCCAGCTACCGCTACGAGGGCTTACCGTCAACGGCGGCGTGACCTGGACCGATGCAGAAAT  
CGCCAGGGACCAGATCACTCCGAGAACACCGGCAACGTGCCGCGCCGCCAAGCCGACTTCGT  
GTGGCAGCTC

>XCGZ2

AACGTGGTCGACGCCAGCGGTGTGTCGCGCTCGCAGAACGGCCTGTACGCCTACGGCACGCCG



TTCTGGGGCGATTGCTGCATCACCCGCAGCTACGACGTGCGCTACGACGTCAACGCACCGTACG  
TGGCGCTACCTTCGACAGCGGCAAGCTCAGCATCGACGGCAGCCTGCGCTACGACATGGGCG  
ATGCGCGCGGCAACTATTCCGGCACCGCCATCGCGCAGAACCTGGACGTCAACGGCGATGGCGT  
GATCCAGCCGGTGGAGCAGCGGTGGCCACCGTGGACACCGCCAATGCGCGGCCAGTGGACTA  
CGACTGGAACCTGTCGTA CTATTGGGCGGCAATTACCTGATCAACGACGACCTGGGCGCA  
TTCGCACGCGTCAGCCGTGGCGCACGCGCCAATGCCGACCGCCTGCTGTTCCGGCGTGATCCGCG  
ACGATGGCTCGGTGACCTCCGATGAAGCGGTCAACGTGGTGGCAGACACCGAAGCCGGCCTGA  
AGTGGCGCCGCGACGGCCTGAGCCTGTTTGCCACCGCGTTTGCCGCGCGCACCCAGGAGCAGA  
ACTTCGAAGTACCAGCCAGCGCTTCTTCAACCGTAGCTACAAGGCGCACGGGATCGAGCTGGA  
AGCCAGCTACCGCTACGAGGGCTTACCGTCAACGGCGGGCGTGACCTGGACCGATGCAGAAAT  
CGCCAGGGACCAGATCACTCCGAGAACACCGGCAACGTGCCGCGCCGCAAGCCGACTTCGT  
GTGGCAGCTC

>XCHN1

AACGTGGTCGACGCCAGCGGTGTGTCGCGCTCGCAGAACGGCCTGTACGCCTACGGCAGCCG  
TTCTGGGGCGATTGCTGCATCACCCGCAGCTACGACGTGCGCTACGACGTCAACGCACCGTACG  
TGGCGCTACCTTCGACAGCGGCAAGCTCAGCATCGACGGCAGCCTGCGCTACGACATGGGCG  
ATGCGCGCGGCAACTATTCCGGCACCGCCATCGCGCAGAACCTGGACGTCAACGGCGATGGCGT  
GATCCAGCCGGTGGAGCAGCGGTGGCCACCGTGGACACCGCCAATGCGCGGCCAGTGGACTA  
CGACTGGAACCTGTCGTA CTATTGGGCGGCAATTACCTGATCAACGACGACCTGGGCGCA  
TTCGCACGCGTCAGCCGTGGCGCACGCGCCAATGCCGACCGCCTGCTGTTCCGGCGTGATCCGCG  
ACGATGGCTCGGTGACCTCCGATGAAGCGGTCAACGTGGTGGCAGACACCGAAGCCGGCCTGA  
AGTGGCGCCGCGACGGCCTGAGCCTGTTTGCCACCGCGTTTGCCGCGCGCACCCAGGAGCAGA  
ACTTCGAAGTACCAGCCAGCGCTTCTTCAACCGTAGCTACAAGGCGCACGGGATCGAGCTGGA  
AGCCAGCTACCGCTACGAGGGCTTACCGTCAACGGCGGGCGTGACCTGGACCGATGCAGAAAT  
CGCCAGGGACCAGATCACTCCGAGAACACCGGCAACGTGCCGCGCCGCAAGCCGACTTCGT  
GTGGCAGCTC

>XCHN2

AACGTGGTCGACGCCAGCGGTGTGTCGCGCTCGCAGAACGGCCTGTACGCCTACGGCAGCCG  
TTCTGGGGCGATTGCTGCATCACCCGCAGCTACGACGTGCGCTACGACGTCAACGCACCGTACG  
TGGCGCTACCTTCGACAGCGGCAAGCTCAGCATCGACGGCAGCCTGCGCTACGACATGGGCG  
ATGCGCGCGGCAACTATTCCGGCACCGCCATCGCGCAGAACCTGGACGTCAACGGCGATGGCGT  
GATCCAGCCGGTGGAGCAGCGGTGGCCACCGTGGACACCGCCAATGCGCGGCCAGTGGACTA  
CGACTGGAACCTGTCGTA CTATTGGGCGGCAATTACCTGATCAACGACGACCTGGGCGCA  
TTCGCACGCGTCAGCCGTGGCGCACGCGCCAATGCCGACCGCCTGCTGTTCCGGCGTGATCCGCG  
ACGATGGCTCGGTGACCTCCGATGAAGCGGTCAACGTGGTGGCAGACACCGAAGCCGGCCTGA  
AGTGGCGCCGCGACGGCCTGAGCCTGTTTGCCACCGCGTTTGCCGCGCGCACCCAGGAGCAGA  
ACTTCGAAGTACCAGCCAGCGCTTCTTCAACCGTAGCTACAAGGCGCACGGGATCGAGCTGGA  
AGCCAGCTACCGCTACGAGGGCTTACCGTCAACGGCGGGCGTGACCTGGACCGATGCAGAAAT  
CGCCAGGGACCAGATCACTCCGAGAACACCGGCAACGTGCCGCGCCGCAAGCCGACTTCGT  
GTGGCAGCTC

>XCNM2

AACGTGGTCGACGCCAGCGGTGTGTCGCGCTCGCAGAACGGCCTGTACGCCTACGGCAGCCG  
TTCTGGGGCGATTGCTGCATCACCCGCAGCTACGACGTGCGCTACGACGTCAACGCACCGTACG  
TGGCGCTACCTTCGACAGCGGCAAGCTCAGCATCGACGGCAGCCTGCGCTACGACATGGGCG

ATGCGCGGGCAACTATTCCGGCACCGCCATCGCGCAGAACCTGGACGTCAACGGCGATGGCGT  
GATCCAGCCGGTGGAGCAGCGCGTGGCCACCGTGGACACCGCCAATGCGCGGCCAGTGGACTA  
CGACTGGAACCTGTCGTA CTATTGGGCGGCAATTACCTGATCAACGACGACCTGGGCGCA  
TTCGCACGCGTCAGCCGTGGCGCACGCGCAATGCCGACCGCCTGCTGTTCCGGCGTGATCCGCG  
ACGATGGCTCGGTGACCTCCGATGAAGCGGTCAACGTGGTGGCAGACACCGAAGCCGGCCTGA  
AGTGGCGCCGCGACGGCCTGAGCCTGTTTGCCACCGCGTTTGCCGCGCGCACCCAGGAGCAGA  
ACTTCGAAGTCAACAGCCAGCGCTTCTTCAACCGTAGCTACAAGGCGCACGGGATCGAGCTGGA  
AGCCAGCTACCGCTACGAGGGCTTACCGTCAACGGCGGCGTGACCTGGACCGATGCAGAAAT  
CGCCAGGGACCAGATCACTCCGGAGAACACCGGCAACGTGCCGCGCCGCCAAGCCGACTTCGT  
GTGGCAGCTC

>XCXZ

AACGTGGTCGACGCCAGCGGTGTGTCGCGCTCGCAGAACGGCCTGTACGCCTACGGCACGCCC  
TTCTGGGGCGATTGCTGCATCACCCGCAGCTACGACGTGCGCTACGACGTCAACGCACCGTACG  
TGGCGCTACCTTCGACAGCGGCAAGCTCAGCATCGACGGCAGCCTGCGCTACGACATGGGCG  
ATGCGCGGGCAACTATTCCGGCACCGCCATCGCGCAGAACCTGGACGTCAACGGCGATGGCGT  
GATCCAGCCGGTGGAGCAGCGCGTGGCCACCGTGGACACCGCCAATGCGCGGCCAGTGGACTA  
CGACTGGAACCTGTCGTA CTATTGGGCGGCAATTACCTGATCAACGACGACCTGGGCGCA  
TTCGCACGCGTCAGCCGTGGCGCACGCGCAATGCCGACCGCCTGCTGTTCCGGCGTGATCCGCG  
ACGATGGCTCGGTGACCTCCGATGAAGCGGTCAACGTGGTGGCAGACACCGAAGCCGGCCTGA  
AGTGGCGCCGCGACGGCCTGAGCCTGTTTGCCACCGCGTTTGCCGCGCGCACCCAGGAGCAGA  
ACTTCGAAGTCAACAGCCAGCGCTTCTTCAACCGTAGCTACAAGGCGCACGGGATCGAGCTGGA  
AGCCAGCTACCGCTACGAGGGCTTACCGTCAACGGCGGCGTGACCTGGACCGATGCAGAAAT  
CGCCAGGGACCAGATCACTCCGGAGAACACCGGCAACGTGCCGCGCCGCCAAGCCGACTTCGT  
GTGGCAGCTC

>XCJY

AACGTGGTCGACGCCAGCGGTGTGTCGCGCTCGCAGAACGGCCTGTACGCCTACGGCACGCCC  
TTCTGGGGCGATTGCTGCATCACCCGCAGCTACGACGTGCGCTACGACGTCAACGCACCGTACG  
TGGCGCTACCTTCGACAGCGGCAAGCTCAGCATCGACGGCAGCCTGCGCTACGACATGGGCG  
ATGCGCGGGCAACTATTCCGGCACCGCCATCGCGCAGAACCTGGACGTCAACGGCGATGGCGT  
GATCCAGCCGGTGGAGCAGCGCGTGGCCACCGTGGACACCGCCAATGCGCGGCCAGTGGACTA  
CGACTGGAACCTGTCGTA CTATTGGGCGGCAATTACCTGATCAACGACGACCTGGGCGCA  
TTCGCACGCGTCAGCCGTGGCGCACGCGCAATGCCGACCGCCTGCTGTTCCGGCGTGATCCGCG  
ACGATGGCTCGGTGACCTCCGATGAAGCGGTCAACGTGGTGGCAGACACCGAAGCCGGCCTGA  
AGTGGCGCCGCGACGGCCTGAGCCTGTTTGCCACCGCGTTTGCCGCGCGCACCCAGGAGCAGA  
ACTTCGAAGTCAACAGCCAGCGCTTCTTCAACCGTAGCTACAAGGCGCACGGGATCGAGCTGGA  
AGCCAGCTACCGCTACGAGGGCTTACCGTCAACGGCGGCGTGACCTGGACCGATGCAGAAAT  
CGCCAGGGACCAGATCACTCCGGAGAACACCGGCAACGTGCCGCGCCGCCAAGCCGACTTCGT  
GTGGCAGCTC

>XCTY

AACGTGGTCGACGCCAGCGGTGTGTCGCGCTCGCAGAACGGCCTGTACGCCTACGGCACGCCC  
TTCTGGGGCGATTGCTGCATCACCCGCAGCTACGACGTGCGCTACGACGTCAACGCACCGTACG  
TGGCGCTACCTTCGACAGCGGCAAGCTCAGCATCGACGGCAGCCTGCGCTACGACATGGGCG  
ATGCGCGGGCAACTATTCCGGCACCGCCATCGCGCAGAACCTGGACGTCAACGGCGATGGCGT  
GATCCAGCCGGTGGAGCAGCGCGTGGCCACCGTGGACACCGCCAATGCGCGGCCAGTGGACTA

CGACTGGAACCTACCTGTCGTA CTCAATTGGGCGGCAATTACCTGATCAACGACGACCTGGGCGCA  
TTCGCACGCGTCAGCCGTGGCGCACGCGCCAATGCCGACCGCCTGCTGTTTCGGCGTGATCCGCG  
ACGATGGCTCGGTGACCTCCGATGAAGCGGTCAACGTGGTGGCAGACACCGAAGCCGGCCTGA  
AGTGGCGCCGCGACGGCCTGAGCCTGTTTGCCACCGGTTTGCCGCGCGCACCCAGGAGCAGA  
ACTTCGAAGTCACCAGCCAGCGCTTCTTCAACCGTAGCTACAAGGCGCACGGGATCGAGCTGGA  
AGCCAGCTACCGCTACGAGGGCTTACCGTCAACGGCGGCGTGACCTGGACCGATGCAGAAAT  
CGCCAGGGACCAGATCACTCCGAGAACACCGGCAACGTGCCGCGCCGCAAGCCGACTTCGT  
GTGGCAGCTC

>XCNM1

AACGTGGTCGACGCCAGCGGTGTGTCGCGCTCGCAGAACGGCCTGTACGCCTACGGCACGCCG  
TTCTGGGGCGATTGCTGCATCACCCGACGCTACGACGTGCGCTACGACGTCAACGCACCGTACG  
TGGCGCTACCTTCGACAGCGGCAAGCTCAGCATCGACGGCAGCCTGCGCTACGACATGGGCG  
ATGCGCGCGGCAACTATTCCGGCACCGCCATCGCGCAGAACCTGGACGTCAACGGCGATGGCGT  
GATCCAGCCGGTGGAGCAGCGGTGGCCACCGTGGACACCGCCAATGCGCGGCCAGTGGACTA  
CGACTGGAACCTACCTGTCGTA CTCAATTGGGCGGCAATTACCTGATCAACGACGACCTGGGCGCA  
TTCGCACGCGTCAGCCGTGGCGCACGCGCCAATGCCGACCGCCTGCTGTTTCGGCGTGATCCGCG  
ACGATGGCTCGGTGACCTCCGATGAAGCGGTCAACGTGGTGGCAGACACCGAAGCCGGCCTGA  
AGTGGCGCCGCGACGGCCTGAGCCTGTTTGCCACCGGTTTGCCGCGCGCACCCAGGAGCAGA  
ACTTCGAAGTCACCAGCCAGCGCTTCTTCAACCGTAGCTACAAGGCGCACGGGATCGAGCTGGA  
AGCCAGCTACCGCTACGAGGGCTTACCGTCAACGGCGGCGTGACCTGGACCGATGCAGAAAT  
CGCCAGGGACCAGATCACTCCGAGAACACCGGCAACGTGCCGCGCCGCAAGCCGACTTCGT  
GTGGCAGCTC

>XCGZ3

AACGTGGTCGACGCCAGCGGTGTGTCGCGCTCGCAGAACGGCCTGTACGCCTACGGCACGCCG  
TTCTGGGGCGATTGCTGCATCACCCGACGCTACGACGTGCGCTACGACGTCAACGCACCGTACG  
TGGCGCTACCTTCGACAGCGGCAAGCTCAGCATCGACGGCAGCCTGCGCTACGACATGGGCG  
ATGCGCGCGGCAACTATTCCGGCACCGCCATCGCGCAGAACCTGGACGTCAACGGCGATGGCGT  
GATCCAGCCGGTGGAGCAGCGGTGGCCACCGTGGACACCGCCAATGCGCGGCCAGTGGACTA  
CGACTGGAACCTACCTGTCGTA CTCAATTGGGCGGCAATTACCTGATCAACGACGACCTGGGCGCA  
TTCGCACGCGTCAGCCGTGGCGCACGCGCCAATGCCGACCGCCTGCTGTTTCGGCGTGATCCGCG  
ACGATGGCTCGGTGACCTCCGATGAAGCGGTCAACGTGGTGGCAGACACCGAAGCCGGCCTGA  
AGTGGCGCCGCGACGGCCTGAGCCTGTTTGCCACCGGTTTGCCGCGCGCACCCAGGAGCAGA  
ACTTCGAAGTCACCAGCCAGCGCTTCTTCAACCGTAGCTACAAGGCGCACGGGATCGAGCTGGA  
AGCCAGCTACCGCTACGAGGGCTTACCGTCAACGGCGGCGTGACCTGGACCGATGCAGAAAT  
CGCCAGGGACCAGATCACTCCGAGAACACCGGCAACGTGCCGCGCCGCAAGCCGACTTCGT  
GTGGCAGCTC

>XCC4

AACGTGGTCGACGCCAGCGGTGTGTCGCGCTCGCAGAACGGCCTGTACGCCTACGGCACGCCG  
TTCTGGGGCGATTGCTGCATCACCCGACGCTACGACGTGCGCTACGACGTCAACGCACCGTACG  
TGGCGCTACCTTCGACAGCGGCAAGCTCAGCATCGACGGCAGCCTGCGCTACGACATGGGCG  
ATGCGCGCGGCAACTATTCCGGCACCGCCATCGCGCAGAACCTGGACGTCAACGGCGATGGCGT  
GATCCAGCCGGTGGAGCAGCGGTGGCCACCGTGGACACCGCCAATGCGCGGCCAGTGGACTA  
CGACTGGAACCTACCTGTCGTA CTCAATTGGGCGGCAATTACCTGATCAACGACGACCTGGGCGCA  
TTCGCACGCGTCAGCCGTGGCGCACGCGCCAATGCCGACCGCCTGCTGTTTCGGCGTGATCCGCG

ACGATGGCTCGGTGACCTCCGATGAAGCGGTCAACGTGGTGGCAGACACCGAAGCCGGCCTGA  
AGTGGCGCCGCGACGGCCTGAGCCTGTTTGCCACCGCGTTTGCCGCGCGCACCCAGGAGCAGA  
ACTTCGAAGTCAACCAGCCAGCGCTTCTTCAACCGTAGCTACAAGGCGCACGGGATCGAGCTGGA  
AGCCAGCTACCGCTACGAGGGCTTACCGTCAACGGCGGCGTGACCTGGACCGATGCAGAAAT  
CGCCAGGGACCAGATCACTCCGGAGAACACCGGCAACGTGCCGCGCCGCCAAGCCGACTTCGT  
GTGGCAGCTC

>XCXZ1

AACGTGGTCGACGCCAGCGGTGTGTCGCGCTCGCAGAACGGCCTGTACGCCTACGGCAGCCG  
TTCTGGGGCGATTGCTGCATACCCGCAGCTACGACGTGCGCTACGACGTCAACGCACCGTACG  
TGGCGCTACCTTCGACAGCGGCAAGCTCAGCATCGACGGCAGCCTGCGCTACGACATGGGCG  
ATGCGCGCGGCAACTATTCCGGCACCGCCATCGCGCAGAACCTGGACGTCAACGGCGATGGCGT  
GATCCAGCCGGTGGAGCAGCGGTGGCCACCGTGGACACCGCCAATGCGCGGCCAGTGGACTA  
CGACTGGAACCTGTCGTA CTATTGGGCGGCAATTACCTGATCAACGACGACCTGGGCGCA  
TTCGCACGCGTCAGCCGTGGCGCACGCGCAATGCCGACCGCCTGCTGTTTCGGCGTGATCCGCG  
ACGATGGCTCGGTGACCTCCGATGAAGCGGTCAACGTGGTGGCAGACACCGAAGCCGGCCTGA  
AGTGGCGCCGCGACGGCCTGAGCCTGTTTGCCACCGCGTTTGCCGCGCGCACCCAGGAGCAGA  
ACTTCGAAGTCAACCAGCCAGCGCTTCTTCAACCGTAGCTACAAGGCGCACGGGATCGAGCTGGA  
AGCCAGCTACCGCTACGAGGGCTTACCGTCAACGGCGGCGTGACCTGGACCGATGCAGAAAT  
CGCCAGGGACCAGATCACTCCGGAGAACACCGGCAACGTGCCGCGCCGCCAAGCCGACTTCGT  
GTGGCAGCTC

>XCGY4

AATGTGGTCGACGCCAGCGGTGTGTCGCGCTCGCAGAACGGCCTGTACGCCTACGGCAGCCCGT  
TCTGGGGCGATTGCTGCATACCCGCAGCTACGACGTGCGCTACGACGTCAACGCACCGTACGT  
GGCGCTACCTTCGACAGCGGCAAGCTCAGCATCGACGGCAGCCTGCGCTACGACATGGGCGA  
TGCGCGCGGCAACTATTCCGGCACCGCCATCGCGCAGAACCTGGACGTCAACGGCGATGGCGT  
GATCCAGCCGGTGGAGCAGCGGTGGCCACCGTGGACACCGCCAATGCGCGGCCAGTGGACTA  
CGACTGGAACCTGTCGTA CTATTGGGCGGCAATTACCTGATCAACGACGACCTGGGCGCA  
TTCGCACGCGTCAGCCGTGGCGCACGCGCAATGCCGACCGCCTGCTGTTTCGGCGTGATCCGCG  
ACGATGGCTCGGTGACCTCCGATGAAGCGGTCAACGTGGTGGCAGACACCGAAGCCGGCCTGA  
AGTGGCGCCGCGACGGCCTGAGCCTGTTTGCCACCGCGTTTGCCGCGCGCACCCAGGAGCAGA  
ACTTCGAAGTCAACCAGCCAGCGCTTCTTCAACCGTAGCTACAAGGCGCACGGGATCGAGCTGGA  
AGCCAGCTACCGCTACGAGGGCTTACCGTCAACGGCGGCGTGACCTGGACCGATGCAGAAAT  
CGCCAGGGACCAGATCACTCCGGAGAACACCGGCAACGTGCCGCGCCGCCAAGCCGACTTCGT  
GTGGCAGCTC

>XCAW2

AACGTGGTCGACGCCAGCGGTGTGTCGCGCTCGCAGAACGGCCTGTACGCCTACGGCAGCCG  
TTCTGGGGCGATTGCTGCATACCCGCAGCTACGACGTGCGCTACGACGTCAACGCACCGTACG  
TGGCGCTACCTTCGACAGCGGCAAGCTCAGCATCGACGGCAGCCTGCGCTACGACATGGGCG  
ATGCGCGCGGCAACTATTCCGGCACCGCCATCGCGCAGAACCTGGACGTCAACGGCGATGGCGT  
GATCCAGCCGGTGGAGCAGCGGTGGCCACCGTGGACACCGCCAATGCGCGGCCAGTGGACTA  
CGACTGGAACCTGTCGTA CTATTGGGCGGCAATTACCTGATCAACGACGACCTGGGCGCA  
TTCGCACGCGTCAGCCGTGGCGCACGCGCAATGCCGACCGCCTGCTGTTTCGGCGTGATCCGCG  
ACGATGGCTCGGTGACCTCCGATGAAGCGGTCAACGTGGTGGCAGACACCGAAGCCGGCCTGA  
AGTGGCGCCGCGACGGCCTGAGCCTGTTTGCCACCGCGTTTGCCGCGCGCACCCAGGAGCAGA

ACTTCGAAGTCACCAGCCAGCGCTTCTTCAACCGTAGCTACAAGGCGCACGGGATCGAGCTGGA  
AGCCAGCTACCGCTACGAGGGCTTACCGTCAACGGCGGCGTGACCTGGACCGATGCAGAAAT  
CGCCAGGGACCAGATCACTCCGAGAACACCGGCAACGTGCCGCGCCGCCAAGCCGACTTCGT  
GTGGCAGCTC

>XCAW3

AACGTGGTCGACGCCAGCGGTGTGTGCGGCTCGCAGAACGGCCTGTACGCCTACGGCACGCCC  
TTCTGGGGCGATTGCTGCATCACCCGCAGCTACGACGTGCGCTACGACGTCAACGCACCGTACG  
TGGCGCTACCTTCGACAGCGGCAAGCTCAGCATCGACGGCAGCCTGCGCTACGACATGGGCG  
ATGCGCGCGGCAACTATTCCGGCACCGCCATCGCGCAGAACCTGGACGTCAACGGCGATGGCGT  
GATCCAGCCGGTGGAGCAGCGGTGGCCACCGTGGACACCGCCAATGCGCGGCCAGTGGACTA  
CGACTGGAACCTGTCGTACTIONTGGGGCGCAATTACCTGATCAACGACGACCTGGGCGCA  
TTCGCACGCGTCAGCCGTGGCGCACGCGCCAATGCCGACCGCCTGCTGTTTCGGCGTGATCCGCG  
ACGATGGCTCGGTGACCTCCGATGAAGCGGTCAACGTGGTGGCAGACACCGAAGCCGGCCTGA  
AGTGGCGCCGCGACGGCCTGAGCCTGTTTGCCACCGGTTTGCCGCGCGCACCCAGGAGCAGA  
ACTTCGAAGTCACCAGCCAGCGCTTCTTCAACCGTAGCTACAAGGCGCACGGGATCGAGCTGGA  
AGCCAGCTACCGCTACGAGGGCTTACCGTCAACGGCGGCGTGACCTGGACCGATGCAGAAAT  
CGCCAGGGACCAGATCACTCCGAGAACACCGGCAACGTGCCGCGCCGCCAAGCCGACTTCGT  
GTGGCAGCTC

>race 1

AACGTGGTCGACGCCAGCGGTGTGTGCGGCTCGCAGAACGGCCTGTACGCCTACGGCACGCCC  
TTCTGGGGCGATTGCTGCATCACCCGCAGCTACGACGTGCGCTACGACGTCAACGCACCGTACG  
TGGCGCTACCTTCGACAGCGGCAAGCTCAGCATCGACGGCAGCCTGCGCTACGACATGGGCG  
ATGCGCGCGGCAACTATTCCGGCACCGCCATCGCGCAGAACCTGGACGTCAACGGCGATGGCGT  
GATCCAGCCGGTGGAGCAGCGGTGGCCACCGTGGACACCGCCAATGCGCGGCCAGTGGACTA  
CGACTGGAACCTGTCGTACTIONTGGGGCGCAATTACCTGATCAACGACGACCTGGGCGCA  
TTCGCACGCGTCAGCCGTGGCGCACGCGCCAATGCCGACCGCCTGCTGTTTCGGCGTGATCCGCG  
ACGATGGCTCGGTGACCTCCGATGAAGCGGTCAACGTGGTGGCAGACACCGAAGCCGGCCTGA  
AGTGGCGCCGCGACGGCCTGAGCCTGTTTGCCACCGGTTTGCCGCGCGCACCCAGGAGCAGA  
ACTTCGAAGTCACCAGCCAGCGCTTCTTCAACCGTAGCTACAAGGCGCACGGGATCGAGCTGGA  
AGCCAGCTACCGCTACGAGGGCTTACCGTCAACGGCGGCGTGACCTGGACCGATGCAGAAAT  
CGCCAGGGACCAGATCACTCCGAGAACACCGGCAACGTGCCGCGCCGCCAAGCCGACTTCGT  
GTGGCAGCTC

>race 2

AATGTGGTCGACGCCAGCGGTGTGTGCGGCTCGCAGAACGGCCTGTACGCCTACGGCACGCCC  
TCTGGGGCGATTGCTGCATCACCCGCAGCTACGACGTGCGCTACGACGTGCACGCACCGTACGT  
GGCGCTACCTTCGACAGCGGCAAGCTCAGCATCGACGGCAGCCTGCGCTACGACATGGGCGA  
TGCGCGCGGCAACTATTCCGGCACCGCCATCGCGCAGAACCTGGACGTCAACGGCGATGGCGT  
GATCCAGCCGGTGGAGCAGCGGTGGCCACCGTGGACACCGCCAATGCGCGGCCAGTGGACTA  
CGACTGGAACCTGTCGTACTIONTGGGGCGCAATTACCTGATCAACGACGACCTGGGCGCA  
TTCGCACGCGTCAGCCGTGGCGCACGCGCCAATGCCGACCGCCTGCTGTTTCGGCGTGATCCGCG  
ACGATGGCTCGGTGACCTCCGATGAAGCGGTCAACGTGGTGGCAGACACCGAAGCCGGCCTGA  
AGTGGCGCCGCGACGGCCTGAGCCTGTTTGCCACCGGTTTGCCGCGCGCACCCAGGAGCAGA  
ACTTCGAAGTCACCAGCCAGCGCTTCTTCAACCGTAGCTACAAGGCGCACGGGATCGAGCTGGA  
AGCCAGCTACCGCTACGAGGGCTTACCGTCAACGGCGGCGTGACCTGGACCGATGCAGAAAT

CGCCAGGGACCAGATCACTCCGGAGAACACCGGCAACGTGCCGCGCCGCCAAGCCGACTTCGT  
GTGGCAGCTC

>race 3

AACGTGGTCGACGCCGCAGGCGTGTTCGCGCTCGCAGAACGGCCTGTACGCCTACGGCACGCCG  
TTCTGGGGCGATTGCTGCATCACCCGCAGCTACGACGTGCGCTACGACGTCAACGCACCGTACG  
TGTCGCTCACCTTCGACAGCGGCAAGCTCAGCATCGACGGCAGCCTGCGCTACGACATGGGCGA  
TGCGCGCGGCAACTATTCCGGCACCGCCATCGCGCAGAACCTGGACGTCAACGGCGATGGCGT  
GATCCAGCCGGTGGAGCAGCGGTGGCCACCGTGGACACCGCCAATGCGCGGCCAGTGGACTA  
CGACTGGAATACTGTCGTAATCATTGGGCGGCAATTACCTGATCAACGACGACCTGGGCGCA  
TTCGCACGCGTCAGCCGTGGCGCACGCGCAATGCCGACCGCCTGCTGTTTCGGCGTGATCCGCG  
ACGATGGCTCGGTGACCTCCGATGAAGCGGTCAACGTGGTGGCAGACACCGAAGCCGGCCTGA  
AGTGGCGCCGCGACGGCCTGAGCCTGTTTGCCACCGCGTTTGCCGCGCGCACCCAGGAGCAGA  
ACTTCGAAGTACCAGCCAGCGCTTCTTCAACCGTAGCTACAAGGCGCACGGGATCGAGCTGGA  
AGCCAGCTACCGCTACGAGGGCTTACCGTCAACGGCGGCGTGACCTGGACCGATGCAGAAAT  
CGCCAGGGACCAGATCACTCCGGAGAACACCGGCAACGTGCCGCGCCGCCAAGCCGACTTCGT  
GTGGCAGCTC

>race 4

AACGTGGTCGACGCCGCAGGCGTGTTCGCGCTCGCAGAACGGCCTGTACGCCTACGGCACGCCG  
TTCTGGGGCGATTGCTGCATCACCCGCAGCTACGACGTGCGCTACGACGTCAACGCACCGTACG  
TGTCGCTCACCTTCGACAGCGGCAAGCTCAGCATCGACGGCAGCCTGCGCTACGACATGGGCGA  
TGCACGCGGCAACTATTCCGGCACCGCCATCGCGCAGAACCTGGACGTCAACGGCGATGGCGT  
GATCCAGCCGGTGGAACAGCGCGTGGCCACCGTGGACACCGCCAATGCGCGGCCAGTGGACTA  
CGACTGGAATACTGTCGTAATCATTGGGCGGCAATTACCTGATCAACGACGACCTGGGCGCAT  
TCGCACGCGTCAGCCGTGGCGCACGCGCAATGCCGACCGCCTGCTGTTTCGGCGTGATCCGCGA  
CGATGGCTCGGTGACCTCCGATGAAGCGGTCAACGTGGTGGCAGACCGAAGCCGGCCTGAA  
GTGGCGCCGCGACGGCCTGAGCCTGTTTGCCACCGCGTTTGCCGCGCGCACCCAGGAGCAGAA  
CTTCGAAGTACCAGCCAGCGCTTCTTCAACCGTAGCTACAAGGCGCACGGCATCGAGCTGGAA  
GCCAGCTACCGCTACGAAGGCTTACCGTCAACGGCGGCGTGACCTGGACCGATGCAGAAATC  
GCCAGGGACCAGATCACCCCGGAGAACACCGGCAACGTGCCGCGTCGCCAGGCCGACTTCGTG  
TGGCAGCTC

>race 5

AATGTGGTCGACGCCAGCGGTGTGTTCGCGCTCGCAGAACGGCCTGTACGCCTACGGCACGCCG  
TCTGGGGCGATTGCTGCATCACCCGCAGCTACGACGTGCGCTACGACGTCAACGCACCGTACGT  
GGCGCTCACCTTCGACAGCGGCAAGCTCAGCATCGACGGCAGCCTGCGCTACGACATGGGCGA  
TGCGCGCGGCAACTATTCCGGCACCGCCATCGCGCAGAACCTGGACGTCAACGGCGATGGCGT  
GATCCAGCCGGTGGAGCAGCGGTGGCCACCGTGGACACCGCCAATGCGCGGCCAGTGGACTA  
CGACTGGAATACTGTCGTAATCATTGGGCGGCAATTACCTGATCAACGACGACCTGGGCGCA  
TTCGCACGCGTCAGCCGTGGCGCACGCGCAATGCCGACCGCCTGCTGTTTCGGCGTGATCCGCG  
ACGATGGCTCGGTGACCTCCGATGAAGCGGTCAACGTGGTGGCAGACACCGAAGCCGGCCTGA  
AGTGGCGCCGCGACGGCCTGAGCCTGTTTGCCACCGCGTTTGCCGCGCGCACCCAGGAGCAGA  
ACTTCGAAGTACCAGCCAGCGCTTCTTCAACCGTAGCTACAAGGCGCACGGGATCGAGCTGGA  
AGCCAGCTACCGCTACGAGGGCTTACCGTCAACGGCGGCGTGACCTGGACCGATGCAGAAAT  
CGCCAGGGACCAGATCACTCCGGAGAACACCGGCAACGTGCCGCGCCGCCAAGCCGACTTCGT  
GTGGCAGCTC

>race 6

AACGTGGTCGACGCCAGCGGTGTGTCGCGCTCGCAGAACGGCCTGTACGCCTACGGCACGCCG  
TTCTGGGGCGATTGCTGCATACCCGCAGCTACGACGTGCGCTACGACGTCAACGCACCGTACG  
TGGCGCTACCTTCGACAGCGGCAAGCTCAGCATCGACGGCAGCCTGCGCTACGACATGGGCG  
ATGCGCGCGGCAACTATTCCGGCACCGCCATCGCGCAGAACCTGGACGTCAACGGCGATGGCGT  
GATCCAGCCGGTGGAGCAGCGGTGGCCACCGTGGACACCGCCAATGCGCGGCCAGTGGACTA  
CGACTGGAACCTGTCGTAATCATTGGGCGGCAATTACCTGATCAACGACGACCTGGGCGCA  
TTCGCACGCGTCAGCCGTGGCGCACGCGCAATGCCGACCGCTTGCTGTTCCGGCGTGATCCGCG  
ACGATGGCTCGGTGACCTCCGATGAAGCGGTGAACGTGGTGCAGACACCGAAGCCGGCCTGA  
AGTGGCGCCGCGACGGCCTGAGCCTGTTTGCCACCGCGTTTGCCGCGCGCACCCAGGAGCAGA  
ACTTCGAAGTACCAGCCAGCGCTTCTTCAACCGTAGCTACAAGGCGCACGGCATCGAACTGGA  
AGCCAGCTACCGCTACGAGGGCTTACCGTCAACGGCGGCGTGACCTGGACCGATGCAGAAAT  
CGCCAGGGACCAGATCACCCCGGAGAACACCGGCAACGTGCCGCGTCGCCAGGCCGACTTCGT  
GTGGCAGCTC

>race 9

AACGTGGTCGACGCCAGCGGTGTGTCGCGCTCGCAGAACGGCCTGTACGCCTACGGCACGCCG  
TTCTGGGGCGATTGCTGCATACCCGCAGCTACGACGTGCGCTACGACGTCAACGCACCGTACG  
TGTCGCTACCTTCGACAGCGGCAAGCTCAGCATCGACGGCAGCCTGCGCTACGACATGGGCGA  
TGCGCGCGGCAACTATTCCGGCACCGCCATCGCGCAGAACCTGGACGTCAACGGCGATGGCGT  
GATCCAGCCGGTGGAGCAGCGGTGGCCACCGTGGACACCGCCAATGCGCGGCCAGTGGACTA  
CGACTGGAACCTGTCGTAATCATTGGGCGGCAATTACCTGATCAACGACGACCTGGGCGCA  
TTCGCACGCGTCAGCCGTGGCGCACGCGCAATGCCGACCGCCTGCTGTTCCGGCGTGATCCGCG  
ACGATGGCTCGGTGACCTCCGATGAAGCGGTGAACGTGGTGCAGACACCGAAGCCGGCCTGA  
AGTGGCGCCGCGACGGCCTGAGCCTGTTTGCCACCGCGTTTGCCGCGCGCACCCAGGAGCAGA  
ACTTCGAAGTACCAGCCAGCGCTTCTTCAACCGTAGCTACAAGGCGCACGGGATCGAGCTGGA  
AGCCAGCTACCGCTACGAGGGCTTACCGTCAACGGCGGCGTGACCTGGACCGATGCAGAAAT  
CGCCAGGGACCAGATCACTCCGAGAACACCGGCAACGTGCCGCGCCGCAAGCCGACTTCGT  
GTGGCAGCTC

*gyrB* (DNA gyrase subunit B)

>XCHZ1

GAGCTGATCGAGCGCGGCTACATCTACATCGGCTTGCCGCCGCTGTACAAGCTCAAGCAGGGCA  
AGAGCGAGCTGTATCTCAAGGACGACGCCGCGCTCAACGCCTACCTGGCCAGCAGCGCGGTG  
AAGGTGCAGCGCTGATCCCGGCCAGCGACGAGCCGCCGATCACCGGCGAGGCGCTGGAAAAA  
CTGCTGCTGTTGTTGCTGGCGCCAAGGAGGCCATTGCCCGCAATGCCACCGCTACGACCCGG  
CGCTGTTGACCGGTTGATCGATCTGCCGCCGCTGGACGTGGTGCAGCTGCAGGCCGAAGGCGA  
CGTGCATCCCACGCTGGATGCGCTGCAGGCAGTGCTCAATCGCGGCACCCTGGGCACGGCGCG  
TATCACCTGCGCTTCGACCCGGCCACCGACAGTGCCGCCGCTCGCTGGTGTGGTGCGCAAGC  
ACATGGGCGAGGAATCACCCAGGTGCTGCCGATGGGCGCGTTCGAAAGTGGTGAGCTGCGTCC  
GCTGCGGAGGTTGCGCTGGCCCTGCATGGCTTGGTGCAGGAAAGGCGCGCAGATCCTGCGTGGC  
AACAAAGAGCCACCCGATCACCGCTTTCGCGAGGCGCAGGCCTGGCTGCTGGAAGAAGCTAAG  
CGGGGCCCGCAGGTGCAGCGCTTCAAGGGCCTGGGCGAAATGAACGCCGAGCAGTTGTGGGAA  
ACCACG

>XCNS

GAGCTGATCGAGCGGGCTACATCTACATCGGCCTGCCGCCGCTGTACAAGCTCAAGCAGGGCA  
AGAGCGAGCTGTATCTCAAGGACGACGCCGCGCTCAACGCCTACCTGGCCAGCAGCGCGGTTCG  
AAGGTGCAGCGCTGATCCCGGCCAGCGACGAGCCGCCGATCACCGGCGAGGCGCTGGAAAAA  
CTGCTGCTGTTGTTTCGCTGGCGCCAAGGAGGCCATTGCCCGCAATGCCACCGCTACGACCCGG  
CGCTGTTGACCGCGTTGATCGATCTGCCGCCGCTGGACGTGGTGCAGCTGCAGGCCGAAGGCGA  
CGTGCATCCCACGCTGGATGCGCTGCAGGCAGTGCTCAATCGCGGCACCCTGGGCACGGCGCGC  
TATCACCTGCGCTTCGACCCGGCCACCGACAGTGCCGCCGCTCGCTGGTGTCCGTGCGCAAGC  
ACATGGGCGAGGAATTCACCCAGGTGCTGCCGATGGGCGCGTTCGAAAGTGGTGAGCTGCGTCC  
GCTGCGCGAGGTTGCGCTGGCCCTGCATGGCTTGGTGCAGCGAAGGCGCGCAGATCCTGCGTGGC  
AAACAAGAGCCACCCGATCACCAGCTTTGCGCAGGCGCAGGCCTGGCTGCTGGAAGAAGCTAAG  
CGGGGCCGCCAGGTGCAGCGCTTCAAGGGCCTGGGCGAAATGAACGCCGAGCAATTGTGGGAA  
ACCACG

>XCNJ

GAGCTGATCGAGCGGGCTACATCTACATCGGCCTGCCGCCGCTGTACAAGCTCAAGCAGGGCA  
AGAGCGAGCTGTATCTCAAGGACGACGCCGCGCTCAACGCCTACCTGGCCAGCAGCGCGGTTCG  
AAGGTGCAGCGCTGATCCCGGCCAGCGACGAGCCGCCGATCACCGGCGAGGCGCTGGAAAAA  
CTGCTGCTGTTGTTTCGCTGGCGCCAAGGAGGCCATTGCCCGCAATGCCACCGCTACGACCCGG  
CGCTGTTGACCGCGTTGATCGATCTGCCGCCGCTGGACGTGGTGCAGCTGCAGGCCGAAGGCGA  
CGTGCATCCCACGCTGGATGCGCTGCAGGCAGTGCTCAATCGCGGCACCCTGGGCACGGCGCGC  
TATCACCTGCGCTTCGACCCGGCCACCGACAGTGCCGCCGCTCGCTGGTGTCCGTGCGCAAGC  
ACATGGGCGAGGAATTCACCCAGGTGCTGCCGATGGGCGCGTTCGAAAGTGGTGAGCTGCGTCC  
GCTGCGCGAGGTTGCGCTGGCCCTGCATGGCTTGGTGCAGCGAAGGCGCGCAGATCCTGCGTGGC  
AAACAAGAGCCACCCGATCACCAGCTTTGCGCAGGCGCAGGCCTGGCTGCTGGAAGAAGCTAAG  
CGGGGCCGCCAGGTGCAGCGCTTCAAGGGCCTGGGCGAAATGAACGCCGAGCAGTTGTGGGAA  
ACCACG

>XCWL

GAGCTGATCGAGCGGGCTACATCTACATCGGCCTGCCGCCGCTGTACAAGCTCAAGCAGGGCA  
AGAGCGAGCTGTATCTCAAGGACGACGCCGCGCTCAACGCCTACCTGGCCAGCAGCGCGGTTCG  
AAGGTGCAGCGCTGATCCCGGCCAGCGACGAGCCGCCGATCACCGGCGAGGCGCTGGAAAAA  
CTGCTGCTGTTGTTTCGCTGGCGCCAAGGAGGCCATTGCCCGCAATGCCACCGCTACGACCCGG  
CGCTGTTGACCGCGTTGATCGATCTGCCGCCGCTGGACGTGGTGCAGCTGCAGGCCGAAGGCGA  
CGTGCATCCCACGCTGGATGCGCTGCAGGCAGTGCTCAATCGCGGCACCCTGGGCACGGCGCGC  
TATCACCTGCGCTTCGACCCGGCCACCGACAGTGCCGCCGCTCGCTGGTGTCCGTGCGCAAGC  
ACATGGGCGAGGAATTCACCCAGGTGCTGCCGATGGGCGCGTTCGAAAGTGGTGAGCTGCGTCC  
GCTGCGCGAGGTTGCGCTGGCCCTGCATGGCTTGGTGCAGCGAAGGCGCGCAGATCCTGCGTGGC  
AAACAAGAGCCACCCGATCACCAGCTTTGCGCAGGCGCAGGCCTGGCTGCTGGAAGAAGCTAAG  
CGGGGCCGCCAGGTGCAGCGCTTCAAGGGCCTGGGCGAAATGAACGCCGAGCAGTTGTGGGAA  
ACCACG

>XCSD

GAGCTGATCGAGCGGGCTACATCTACATCGGCCTGCCGCCGCTGTACAAGCTCAAGCAGGGCA  
AGAGCGAGCTGTATCTCAAGGACGACGCCGCGCTCAACGCCTACCTGGCCAGCAGCGCGGTTCG  
AAGGTGCAGCGCTGATCCCGGCCAGCGACGAGCCGCCGATCACCGGCGAGGCGCTGGAAAAA  
CTGCTGCTGTTGTTTCGCTGGCGCCAAGGAGGCCATTGCCCGCAATGCCACCGCTACGACCCGG



CGCTGTTGACCGCGTTGATCGATCTGCCGCCGCTGGACGTGGTGCAGCTGCAGGCCGAAGGCGA  
CGTGCATCCCACGCTGGATGCGCTGCAGGCAGTGCTCAATCGCGGCACCCTGGGCACGGCGCGC  
TATCACCTGCGCTTCGACCCGGCCACCGACAGTGCCGCCGCTCGCTGGTGTCCGTGCGCAAGC  
ACATGGGCGAGGAATTCACCCAGGTGCTGCCGATGGGCGCGTTCGAAAGTGGTGAGCTGCGTCC  
GCTGCGCGAGGTTGCGCTGGCCCTGCATGGCTTGGTGCGCGAAGGCGCGCAGATCCTGCGTGGC  
AACAAAGAGCCACCCGATCACCAGCTTTGCGCAGGCGCAGGCCTGGCTGCTGGAAGAAGCTAAG  
CGGGGCCGCCAGGTGCAGCGCTTCAAGGGCCTGGGCGAAATGAACGCCGAGCAGTTGTGGGAA  
ACCACG

>XCJM

GAGCTGATCGAGCGCGGCTACATCTACATCGGCTTGCCGCCGCTGTACAAGCTCAAGCAGGGCA  
AGAGCGAGCTGTATCTCAAGGACGACGCCGCGCTCAACGCCTACCTGGCCAGCAGCGCGGTG  
AAGGTGCAGCGCTGATCCCGGCCAGCGACGAGCCGCCGATCACCGGCGAGGCGCTGGAAAAA  
CTGCTGCTGTTGTTGCTGGCGCCAAGGAGGCCATTGCCCGCAATGCCACCCGCTACGACCCGG  
CGCTGTTGACCGCGTTGATCGATCTGCCGCCGCTGGACGTGGTGCAGCTGCAGGCCGAAGGCGA  
CGTGCATCCCACGCTGGATGCGCTGCAGGCAGTGCTCAATCGCGGCACCCTGGGCACGGCGCGC  
TATCACCTGCGCTTCGACCCGGCCACCGACAGTGCCGCCGCTCGCTGGTGTCCGTGCGCAAGC  
ACATGGGCGAGGAATTCACCCAGGTGCTGCCGATGGGCGCGTTCGAAAGTGGTGAGCTGCGTCC  
GCTGCGCGAGGTTGCGCTGGCCCTGCATGGCTTGGTGCGCGAAGGCGCGCAGATCCTGCGTGGC  
AACAAAGAGCCACCCGATCACCAGCTTTGCGCAGGCGCAGGCCTGGCTGCTGGAAGAAGCTAAG  
CGGGGCCGCCAGGTGCAGCGCTTCAAGGGCCTGGGCGAAATGAACGCCGAGCAGTTGTGGGAA  
ACCACG

>XCYL

GAGCTGATCGAGCGCGGCTACATCTACATCGGCTTGCCGCCGCTGTACAAGCTCAAGCAGGGCA  
AGAGCGAGCTGTATCTCAAGGACGACGCCGCGCTCAACGCCTACCTGGCCAGCAGCGCGGTG  
AAGGTGCAGCGCTGATCCCGGCCAGCGACGAGCCGCCGATCACCGGCGAGGCGCTGGAAAAA  
CTGCTGCTGTTGTTGCTGGCGCCAAGGAGGCCATTGCCCGCAATGCCACCCGCTACGACCCGG  
CGCTGTTGACCGCGTTGATCGATCTGCCGCCGCTGGACGTGGTGCAGCTGCAGGCCGAAGGCGA  
CGTGCATCCCACGCTGGATGCGCTGCAGGCAGTGCTCAATCGCGGCACCCTGGGCACGGCGCGC  
TATCACCTGCGCTTCGACCCGGCCACCGACAGTGCCGCCGCTCGCTGGTGTCCGTGCGCAAGC  
ACATGGGCGAGGAATTCACCCAGGTGCTGCCGATGGGCGCGTTCGAAAGTGGTGAGCTGCGTCC  
GCTGCGCGAGGTTGCGCTGGCCCTGCATGGCTTGGTGCGCGAAGGCGCGCAGATCCTGCGTGGC  
AACAAAGAGCCACCCGATCACCAGCTTTGCGCAGGCGCAGGCCTGGCTGCTGGAAGAAGCTAAG  
CGGGGCCGCCAGGTGCAGCGCTTCAAGGGCCTGGGCGAAATGAACGCCGAGCAGTTGTGGGAA  
ACCACG

>XCBS

GAGCTGATCGAGCGCGGCTACATCTACATCGGCTTGCCGCCGCTGTACAAGCTCAAGCAGGGCA  
AGAGCGAGCTGTATCTCAAGGACGACGCCGCGCTCAACGCCTACCTGGCCAGCAGCGCGGTG  
AAGGTGCAGCGCTGATCCCGGCCAGCGACGAGCCGCCGATCACCGGCGAGGCGCTGGAAAAA  
CTGCTGCTGTTGTTGCTGGCGCCAAGGAGGCCATTGCCCGCAATGCCACCCGCTACGACCCGG  
CGCTGTTGACCGCGTTGATCGATCTGCCGCCGCTGGACGTGGTGCAGCTGCAGGCCGAAGGCGA  
CGTGCATCCCACGCTGGATGCGCTGCAGGCAGTGCTCAATCGCGGCACCCTGGGCACGGCGCGC  
TATCACCTGCGCTTCGACCCGGCCACCGACAGTGCCGCCGCTCGCTGGTGTCCGTGCGCAAGC  
ACATGGGCGAGGAATTCACCCAGGTGCTGCCGATGGGCGCGTTCGAAAGTGGTGAGCTGCGTCC  
GCTGCGCGAGGTTGCGCTGGCCCTGCATGGCTTGGTGCGCGAAGGCGCGCAGATCCTGCGTGGC

AACAAGAGCCACCCGATCACCAGCTTTGCGCAGGCGCAGGCCTGGCTGCTGGAAGAAGCTAAG  
CGGGGCCGCCAGGTGCAGCGCTTCAAGGGCCTGGGCGAAATGAACGCCGAGCAGTTGTGGGAA  
ACCACG

>XCJN

GAGCTGATCGAGCGGGCTACATCTACATCGGCTTGCCGCCGCTGTACAAGCTCAAGCAGGGCA  
AGAGCGAGCTGTATCTCAAGGACGACGCCGCGCTCAACGCCTACCTGGCCAGCAGCGCGGTTCG  
AAGGTGCAGCGCTGATCCCGGCCAGCGACGAGCCGCCGATCACCGGCGAGGCGCTGGAAAAA  
CTGCTGCTGTTGTTTCGCTGGCGCCAAGGAGGCCATTGCCCGCAATGCCACCGCTACGACCCGG  
CGCTGTTGACCGCGTTGATCGATCTGCCGCCGCTGGACGTGGTGCAGCTGCAGGCCGAAGGCGA  
CGTGCATCCCACGCTGGATGCGCTGCAGGCAGTGCTCAATCGCGGCACCCTGGGCACGGCGCGC  
TATCACCTGCGCTTCGACCCGGCCACCGACAGTGCCGCCGCTCGCTGGTGTGGTGCAGCAAGC  
ACATGGGCGAGGAATTCACCCAGGTGCTGCCGATGGGCGCGTTCGAAAGTGGTGAGCTGCGTCC  
GCTGCGCGAGGTTGCGCTGGCCCTGCATGGCTTGGTGCAGCAAGGCGCGCAGATCCTGCGTGGC  
AACAAGAGCCACCCGATCACCAGCTTTGCGCAGGCGCAGGCCTGGCTGCTGGAAGAAGCTAAG  
CGGGGCCGCCAGGTGCAGCGCTTCAAGGGCCTGGGCGAAATGAACGCCGAGCAGTTGTGGGAA  
ACCACG

>XCCW

GAGCTGATCGAGCGGGCTACATCTACATCGGCTTGCCGCCGCTGTACAAGCTCAAGCAGGGCA  
AGAGCGAGCTGTATCTCAAGGACGACGCCGCGCTCAACGCCTACCTGGCCAGCAGCGCGGTTCG  
AAGGTGCAGCGCTGATCCCGGCCAGCGACGAGCCGCCGATCACCGGCGAGGCGCTGGAAAAA  
CTGCTGCTGTTGTTTCGCTGGCGCCAAGGAGGCCATTGCCCGCAATGCCACCGCTACGACCCGG  
CGCTGTTGACCGCGTTGATCGATCTGCCGCCGCTGGACGTGGTGCAGCTGCAGGCCGAAGGCGA  
CGTGCATCCCACGCTGGATGCGCTGCAGGCAGTGCTCAATCGCGGCACCCTGGGCACGGCGCGC  
TATCACCTGCGCTTCGACCCGGCCACCGACAGTGCCGCCGCTCGCTGGTGTGGTGCAGCAAGC  
ACATGGGCGAGGAATTCACCCAGGTGCTGCCGATGGGCGCGTTCGAAAGTGGTGAGCTGCGTCC  
GCTGCGCGAGGTTGCGCTGGCCCTGCATGGCTTGGTGCAGCAAGGCGCGCAGATCCTGCGTGGC  
AACAAGAGCCACCCGATCACCAGCTTTGCGCAGGCGCAGGCCTGGCTGCTGGAAGAAGCTAAG  
CGGGGCCGCCAGGTGCAGCGCTTCAAGGGCCTGGGCGAAATGAACGCCGAGCAGTTGTGGGAA  
ACCACG

>XCWH1

GAGCTGATCGAGCGGGCTACATCTACATCGGCTTGCCGCCGCTGTACAAGCTCAAGCAGGGCA  
AGAGCGAGCTGTATCTCAAGGACGACGCCGCGCTCAACGCCTACCTGGCCAGCAGCGCGGTTCG  
AAGGTGCAGCGCTGATCCCGGCCAGCGACGAGCCGCCGATCACCGGCGAGGCGCTGGAAAAA  
CTGCTGCTGTTGTTTCGCTGGCGCCAAGGAGGCCATTGCCCGCAATGCCACCGCTACGACCCGG  
CGCTGTTGACCGCGTTGATCGATCTGCCGCCGCTGGACGTGGTGCAGCTGCAGGCCGAAGGCGA  
CGTGCATCCCACGCTGGATGCGCTGCAGGCAGTGCTCAATCGCGGCACCCTGGGCACGGCGCGC  
TATCACCTGCGCTTCGACCCGGCCACCGACAGTGCCGCCGCTCGCTGGTGTGGTGCAGCAAGC  
ACATGGGCGAGGAATTCACCCAGGTGCTGCCGATGGGCGCGTTCGAAAGTGGTGAGCTGCGTCC  
GCTGCGCGAGGTTGCGCTGGCCCTGCATGGCTTGGTGCAGCAAGGCGCGCAGATCCTGCGTGGC  
AACAAGAGCCACCCGATCACCAGCTTTGCGCAGGCGCAGGCCTGGCTGCTGGAAGAAGCTAAG  
CGGGGCCGCCAGGTGCAGCGCTTCAAGGGCCTGGGCGAAATGAACGCCGAGCAGTTGTGGGAA  
ACCACG

>XCWH2

GAGCTGATCGAGCGGGCTACATCTACATCGGCTTGCCGCCGCTGTACAAGCTCAAGCAGGGCA

AGAGCGAGCTGTATCTCAAGGACGACGCCGCGCTCAACGCCTACCTGGCCAGCAGCGCGGTTCG  
AAGGTGCAGCGCTGATCCCGGCCAGCGACGAGCCGCCGATCACCGGCGAGGCGCTGGAAAAA  
CTGCTGCTGTTGTTTCGCTGGCGCCAAGGAGGCCATTGCCCGCAATGCCACCGCTACGACCCGG  
CGCTGTTGACCGCGTTGATCGATCTGCCGCCGCTGGACGTGGTGCAGCTGCAGGCCGAAGGCCA  
CGTGCATCCCACGCTGGATGCGCTGCAGGCAGTGCTCAATCGCGGCACCCTGGGCACGGCGCGC  
TATCACCTGCGCTTCGACCCGGCCACCGACAGTGCCGCCGCTCGCTGGTGTTCGGTGCAGCAAGC  
ACATGGGCGAGGAATTCACCCAGGTGCTGCCGATGGGCGCGTTCGAAAGTGGTGCAGCTGCGTCC  
GCTGCGCGAGGTTGCGCTGGCCCTGCATGGCTTGGTGCAGCAAGGCGCGCAGATCCTGCGTGGC  
AACAAAGAGCCACCCGATCACCCAGCTTTGCGCAGGCGCAGGCCTGGCTGCTGGAAGAAGCTAAG  
CGGGGCCGCCAGGTGCAGCGCTTCAAGGGCCTGGGCGAAATGAACGCCGAGCAGTTGTGGGAA  
ACCACG

>XCDX1

GAGCTGATCGAGCGCGGCTACATCTACATCGGCTTGCCGCCGCTGTACAAGCTCAAGCAGGGCA  
AGAGCGAGCTGTATCTCAAGGACGACGCCGCGCTCAACGCCTACCTGGCCAGCAGCGCGGTTCG  
AAGGTGCAGCGCTGATCCCGGCCAGCGACGAGCCGCCGATCACCGGCGAGGCGCTGGAAAAA  
CTGCTGCTGTTGTTTCGCTGGCGCCAAGGAGGCCATTGCCCGCAATGCCACCGCTACGACCCGG  
CGCTGTTGACCGCGTTGATCGATCTGCCGCCGCTGGACGTGGTGCAGCTGCAGGCCGAAGGCCA  
CGTGCATCCCACGCTGGATGCGCTGCAGGCAGTGCTCAATCGCGGCACCCTGGGCACGGCGCGC  
TATCACCTGCGCTTCGACCCGGCCACCGACAGTGCCGCCGCTCGCTGGTGTTCGGTGCAGCAAGC  
ACATGGGCGAGGAATTCACCCAGGTGCTGCCGATGGGCGCGTTCGAAAGTGGTGCAGCTGCGTCC  
GCTGCGCGAGGTTGCGCTGGCCCTGCATGGCTTGGTGCAGCAAGGCGCGCAGATCCTGCGTGGC  
AACAAAGAGCCACCCGATCACCCAGCTTTGCGCAGGCGCAGGCCTGGCTGCTGGAAGAAGCTAAG  
CGGGGCCGCCAGGTGCAGCGCTTCAAGGGCCTGGGCGAAATGAACGCCGAGCAGTTGTGGGAA  
ACCACG

>XCDX2

GAGCTGATCGAGCGCGGCTACATCTACATCGGCTTGCCGCCGCTGTACAAGCTCAAGCAGGGCA  
AGAGCGAGCTGTATCTCAAGGACGACGCCGCGCTCAACGCCTACCTGGCCAGCAGCGCGGTTCG  
AAGGTGCAGCGCTGATCCCGGCCAGCGACGAGCCGCCGATCACCGGCGAGGCGCTGGAAAAA  
CTGCTGCTGTTGTTTCGCTGGCGCCAAGGAGGCCATTGCCCGCAATGCCACCGCTACGACCCGG  
CGCTGTTGACCGCGTTGATCGATCTGCCGCCGCTGGACGTGGTGCAGCTGCAGGCCGAAGGCCA  
CGTGCATCCCACGCTGGATGCGCTGCAGGCAGTGCTCAATCGCGGCACCCTGGGCACGGCGCGC  
TATCACCTGCGCTTCGACCCGGCCACCGACAGTGCCGCCGCTCGCTGGTGTTCGGTGCAGCAAGC  
ACATGGGCGAGGAATTCACCCAGGTGCTGCCGATGGGCGCGTTCGAAAGTGGTGCAGCTGCGTCC  
GCTGCGCGAGGTTGCGCTGGCCCTGCATGGCTTGGTGCAGCAAGGCGCGCAGATCCTGCGTGGC  
AACAAAGAGCCACCCGATCACCCAGCTTTGCGCAGGCGCAGGCCTGGCTGCTGGAAGAAGCTAAG  
CGGGGCCGCCAGGTGCAGCGCTTCAAGGGCCTGGGCGAAATGAACGCCGAGCAGTTGTGGGAA  
ACCACG

>XCDX3

GAGCTGATCGAGCGCGGCTACATCTACATCGGCTTGCCGCCGCTGTACAAGCTCAAGCAGGGCA  
AGAGCGAGCTGTATCTCAAGGACGACGCCGCGCTCAACGCCTACCTGGCCAGCAGCGCGGTTCG  
AAGGTGCAGCGCTGATCCCGGCCAGCGACGAGCCGCCGATCACCGGCGAGGCGCTGGAAAAA  
CTGCTGCTGTTGTTTCGCTGGCGCCAAGGAGGCCATTGCCCGCAATGCCACCGCTACGACCCGG  
CGCTGTTGACCGCGTTGATCGATCTGCCGCCGCTGGACGTGGTGCAGCTGCAGGCCGAAGGCCA  
CGTGCATCCCACGCTGGATGCGCTGCAGGCAGTGCTCAATCGCGGCACCCTGGGCACGGCGCGC

TATCACCTGCGCTTCGACCCGGCCACCGACAGTGCCGCCGCTCGCTGGTGTGGTGCGCAAGC  
ACATGGGCGAGGAATTCACCCAGGTGCTGCCGATGGGCGCGTTCGAAAGTGGTGAGCTGCGTCC  
GCTGCGCGAGGTTGCGCTGGCCCTGCATGGCTTGGTGC GCGAAGGCGCGCAGATCCTGCGTGGC  
AACAAAGAGCCACCCGATCACCAGCTTTGCGCAGGCGCAGGCCTGGCTGCTGGAAGAAGCTAAG  
CGGGGCCGCCAGGTGCAGCGCTTCAAGGGCCTGGGCGAAATGAACGCCGAGCAGTTGTGGGAA  
ACCACG

>XCTG

GAGCTGATCGAGCGGGCTACATCTACATCGGCCTGCCGCCGCTGTACAAGCTCAAGCAGGGCA  
AGAGCGAGCTGTATCTCAAGGACGACGCCGCGCTCAACGCCTACCTGGCCAGCAGCGCGGTTCG  
AAGGTGCAGCGCTGATCCCGGCCAGCGACGAGCCGCCGATCACCGGCGAGGCGCTGGAAAAA  
CTGCTGCTGTTGTTTCGCTGGCGCCAAGGAGGCCATTGCCCGCAATGCCACCGCTACGACCCGG  
CGCTGTTGACCGCGTTGATCGATCTGCCGCCGCTGGACGTGGTGCAGCTGCAGGCCGAAGGCGA  
CGTGCATCCCACGCTGGATGCGCTGCAGGCAGTGCTCAATCGCGGCACCCTGGGCACGGCGCGC  
TATCACCTGCGCTTCGACCCGGCCACCGACAGTGCCGCCGCTCGCTGGTGTGGTGCGCAAGC  
ACATGGGCGAGGAATTCACCCAGGTGCTGCCGATGGGCGCGTTCGAAAGTGGTGAGCTGCGTCC  
GCTGCGCGAGGTTGCGCTGGCCCTGCATGGCTTGGTGC GCGAAGGCGCGCAGATCCTGCGTGGC  
AACAAAGAGCCACCCGATCACCAGCTTTGCGCAGGCGCAGGCCTGGCTGCTGGAAGAAGCTAAG  
CGGGGCCGCCAGGTGCAGCGCTTCAAGGGCCTGGGCGAAATGAACGCCGAGCAATTGTGGGAA  
ACCACG

>XCAW1

GAGCTGATCGAGCGGGCTACATCTACATCGGCCTGCCGCCGCTGTACAAGCTCAAGCAGGGCA  
AGAGCGAGCTGTATCTCAAGGACGACGCCGCGCTCAACGCCTACCTGGCCAGCAGCGCGGTTCG  
AAGGTGCAGCGCTGATCCCGGCCAGCGACGAGCCGCCGATCACCGGCGAGGCGCTGGAAAAA  
CTGCTGCTGTTGTTTCGCTGGCGCCAAGGAGGCCATTGCCCGCAATGCCACCGCTACGACCCGG  
CGCTGTTGACCGCGTTGATCGATCTGCCGCCGCTGGACGTGGTGCAGCTGCAGGCCGAAGGCGA  
CGTGCATCCCACGCTGGATGCGCTGCAGGCAGTGCTCAATCGCGGCACCCTGGGCACGGCGCGC  
TATCACCTGCGCTTCGACCCGGCCACCGACAGTGCCGCCGCTCGCTGGTGTGGTGCGCAAGC  
ACATGGGCGAGGAATTCACCCAGGTGCTGCCGATGGGCGCGTTCGAAAGTGGTGAGCTGCGTCC  
GCTGCGCGAGGTTGCGCTGGCCCTGCATGGCTTGGTGC GCGAAGGCGCGCAGATCCTGCGTGGC  
AACAAAGAGCCACCCGATCACCAGCTTTGCGCAGGCGCAGGCCTGGCTGCTGGAAGAAGCTAAG  
CGGGGCCGCCAGGTGCAGCGCTTCAAGGGCCTGGGCGAAATGAACGCCGAGCAGTTGTGGGAA  
ACCACG

>XCYQ1

GAGCTGATCGAGCGGGCTACATCTACATCGGCCTGCCGCCGCTGTACAAGCTCAAGCAGGGCA  
AGAGCGAGCTGTATCTCAAGGACGACGCCGCGCTCAACGCCTACCTGGCCAGCAGCGCGGTTCG  
AAGGTGCAGCGCTGATCCCGGCCAGCGACGAGCCGCCGATCACCGGCGAGGCGCTGGAAAAA  
CTGCTGCTGTTGTTTCGCTGGCGCCAAGGAGGCCATTGCCCGCAATGCCACCGCTACGACCCGG  
CGCTGTTGACCGCGTTGATCGATCTGCCGCCGCTGGACGTGGTGCAGCTGCAGGCCGAAGGCGA  
CGTGCATCCCACGCTGGATGCGCTGCAGGCAGTGCTCAATCGCGGCACCCTGGGCACGGCGCGC  
TATCACCTGCGCTTCGACCCGGCCACCGACAGTGCCGCCGCTCGCTGGTGTGGTGCGCAAGC  
ACATGGGCGAGGAATTCACCCAGGTGCTGCCGATGGGCGCGTTCGAAAGTGGTGAGCTGCGTCC  
GCTGCGCGAGGTTGCGCTGGCCCTGCATGGCTTGGTGC GCGAAGGCGCGCAGATCCTGCGTGGC  
AACAAAGAGCCACCCGATCACCAGCTTTGCGCAGGCGCAGGCCTGGCTGCTGGAAGAAGCTAAG  
CGGGGCCGCCAGGTGCAGCGCTTCAAGGGCCTGGGCGAAATGAACGCCGAGCAGTTGTGGGAA

ACCACG

>XCYQ2

GAGCTGATCGAGCGGGCTACATCTACATCGGCTTGCCGCCGCTGTACAAGCTCAAGCAGGGCA  
AGAGCGAGCTGTATCTCAAGGACGACGCCGCGCTCAACGCCTACCTGGCCAGCAGCGCGGTTCG  
AAGGTGCAGCGCTGATCCCGGCCAGCGACGAGCCGCCGATCACCGGCGAGGCGCTGGAAAAA  
CTGCTGCTGTTGTTTCGCTGGCGCCAAGGAGGCCATTGCCCGCAATGCCACCGCTACGACCCGG  
CGCTGTTGACCGCGTTGATCGATCTGCCGCCGCTGGACGTGGTGCAGCTGCAGGCCGAAGGCCA  
CGTGCATCCCACGCTGGATGCGCTGCAGGCAGTGCTCAATCGCGGCACCCTGGGCACGGCGCGC  
TATCACCTGCGCTTCGACCCGGCCACCGACAGTGCCGCCGCTCGCTGGTGTTCGGTTCGCAAGC  
ACATGGGCGAGGAATTCACCCAGGTGCTGCCGATGGGCGCGTTCGAAAGTGGTGAGCTGCGTCC  
GCTGCGCGAGGTTGCGCTGGCCCTGCATGGCTTGGTGCAGGCGAAGGCGCGCAGATCCTGCGTGGC  
AACAAAGAGCCACCCGATCACCCAGCTTTGCGCAGGCGCAGGCCTGGCTGCTGGAAGAAGCTAAG  
CGGGGCCGCCAGGTGCAGCGCTTCAAGGGCCTGGGCGAAATGAACGCCGAGCAGTTGTGGGAA  
ACCACG

>XCYQ3

GAGCTGATCGAGCGGGCTACATCTACATCGGCTTGCCGCCGCTGTACAAGCTCAAGCAGGGCA  
AGAGCGAGCTGTATCTCAAGGACGACGCCGCGCTCAACGCCTACCTGGCCAGCAGCGCGGTTCG  
AAGGTGCAGCGCTGATCCCGGCCAGCGACGAGCCGCCGATCACCGGCGAGGCGCTGGAAAAA  
CTGCTGCTGTTGTTTCGCTGGCGCCAAGGAGGCCATTGCCCGCAATGCCACCGCTACGACCCGG  
CGCTGTTGACCGCGTTGATCGATCTGCCGCCGCTGGACGTGGTGCAGCTGCAGGCCGAAGGCCA  
CGTGCATCCCACGCTGGATGCGCTGCAGGCAGTGCTCAATCGCGGCACCCTGGGCACGGCGCGC  
TATCACCTGCGCTTCGACCCGGCCACCGACAGTGCCGCCGCTCGCTGGTGTTCGGTTCGCAAGC  
ACATGGGCGAGGAATTCACCCAGGTGCTGCCGATGGGCGCGTTCGAAAGTGGTGAGCTGCGTCC  
GCTGCGCGAGGTTGCGCTGGCCCTGCATGGCTTGGTGCAGGCGAAGGCGCGCAGATCCTGCGTGGC  
AACAAAGAGCCACCCGATCACCCAGCTTTGCGCAGGCGCAGGCCTGGCTGCTGGAAGAAGCTAAG  
CGGGGCCGCCAGGTGCAGCGCTTCAAGGGCCTGGGCGAAATGAACGCCGAGCAGTTGTGGGAA  
ACCACG

>XCGY1

GAGCTGATCGAGCGGGCTACATCTACATCGGCTTGCCGCCGCTGTACAAGCTCAAGCAGGGCA  
AGAGCGAGCTGTATCTCAAGGACGACGCCGCGCTCAACGCCTACCTGGCCAGCAGCGCGGTTCG  
AAGGTGCAGCGCTGATCCCGGCCAGCGACGAGCCGCCGATCACCGGCGAGGCGCTGGAAAAA  
CTGCTGCTGTTGTTTCGCTGGCGCCAAGGAGGCCATTGCCCGCAATGCCACCGCTACGACCCGG  
CGCTGTTGACCGCGTTGATCGATCTGCCGCCGCTGGACGTGGTGCAGCTGCAGGCCGAAGGCCA  
CGTGCATCCCACGCTGGATGCGCTGCAGGCAGTGCTCAATCGCGGCACCCTGGGCACGGCGCGC  
TATCACCTGCGCTTCGACCCGGCCACCGACAGTGCCGCCGCTCGCTGGTGTTCGGTTCGCAAGC  
ACATGGGCGAGGAATTCACCCAGGTGCTGCCGATGGGCGCGTTCGAAAGTGGTGAGCTGCGTCC  
GCTGCGCGAGGTTGCGCTGGCCCTGCATGGCTTGGTGCAGGCGAAGGCGCGCAGATCCTGCGTGGC  
AACAAAGAGCCACCCGATCACCCAGCTTTGCGCAGGCGCAGGCCTGGCTGCTGGAAGAAGCTAAG  
CGGGGCCGCCAGGTGCAGCGCTTCAAGGGCCTGGGCGAAATGAACGCCGAGCAGTTGTGGGAA  
ACCACG

>XCGY2

GAGCTGATCGAGCGGGCTACATCTACATCGGCTTGCCGCCGCTGTACAAGCTCAAGCAGGGCA  
AGAGCGAGCTGTATCTCAAGGACGACGCCGCGCTCAACGCCTACCTGGCCAGCAGCGCGGTTCG  
AAGGTGCAGCGCTGATCCCGGCCAGCGACGAGCCGCCGATCACCGGCGAGGCGCTGGAAAAA

CTGCTGCTGTTGTTTCGCTGGCGCCAAGGAGGCCATTGCCCGCAATGCCACCGCTACGACCCGG  
CGCTGTTGACCGCGTTGATCGATCTGCCGCCGCTGGACGTGGTGCAGCTGCAGGCCGAAGGCGA  
CGTGCATCCCACGCTGGATGCGCTGCAGGCAGTGCTCAATCGCGGCACCCTGGGCACGGCGCGC  
TATCACCTGCGCTTCGACCCGGCCACCGACAGTGCCGCCGCTCGCTGGTGTGGTGCGCAAGC  
ACATGGGCGAGGAATTCACCCAGGTGCTGCCGATGGGCGCGTTCGAAAGTGGTGAGCTGCGTCC  
GCTGCGCGAGGTTGCGCTGGCCCTGCATGGCTTGGTGCGCGAAGGCGCGCAGATCCTGCGTGGC  
AACAAGAGCCACCCGATCACCAGCTTTGCGCAGGCGCAGGCCTGGCTGCTGGAAGAAGCTAAG  
CGGGGCCGCCAGGTGCAGCGCTTCAAGGGCCTGGGCGAAATGAACGCCGAGCAGTTGTGGGAA  
ACCACG

>XCGY3

GAGCTGATCGAGCGGGCTACATCTACATCGGCCTGCCGCCGCTGTACAAGCTCAAGCAGGGCA  
AGAGCGAGCTGTATCTCAAGGACGACGCCGCGCTCAACGCCTACCTGGCCAGCAGCGCGGTTCG  
AAGGTGCAGCGCTGATCCCGGCCAGCGACGAGCCGCCGATCACCGGCGAGGCGCTGGAAAAA  
CTGCTGCTGTTGTTTCGCTGGCGCCAAGGAGGCCATTGCCCGCAATGCCACCGCTACGACCCGG  
CGCTGTTGACCGCGTTGATCGATCTGCCGCCGCTGGACGTGGTGCAGCTGCAGGCCGAAGGCGA  
CGTGCATCCCACGCTGGATGCGCTGCAGGCAGTGCTCAATCGCGGCACCCTGGGCACGGCGCGC  
TATCACCTGCGCTTCGACCCGGCCACCGACAGTGCCGCCGCTCGCTGGTGTGGTGCGCAAGC  
ACATGGGCGAGGAATTCACCCAGGTGCTGCCGATGGGCGCGTTCGAAAGTGGTGAGCTGCGTCC  
GCTGCGCGAGGTTGCGCTGGCCCTGCATGGCTTGGTGCGCGAAGGCGCGCAGATCCTGCGTGGC  
AACAAGAGCCACCCGATCACCAGCTTTGCGCAGGCGCAGGCCTGGCTGCTGGAAGAAGCTAAG  
CGGGGCCGCCAGGTGCAGCGCTTCAAGGGCCTGGGCGAAATGAACGCCGAGCAATTGTGGGAA  
ACCACG

>XCC1

GAGCTGATCGAGCGGGCTACATCTACATCGGCCTGCCGCCGCTGTACAAGCTCAAGCAGGGCA  
AGAGCGAGCTGTATCTCAAGGACGACGCCGCGCTCAACGCCTACCTGGCCAGCAGCGCGGTTCG  
AAGGTGCAGCGCTGATCCCGGCCAGCGACGAGCCGCCGATCACCGGCGAGGCGCTGGAAAAA  
CTGCTGCTGTTGTTTCGCTGGCGCCAAGGAGGCCATTGCCCGCAATGCCACCGCTACGACCCGG  
CGCTGTTGACCGCGTTGATCGATCTGCCGCCGCTGGACGTGGTGCAGCTGCAGGCCGAAGGCGA  
CGTGCATCCCACGCTGGATGCGCTGCAGGCAGTGCTCAATCGCGGCACCCTGGGCACGGCGCGC  
TATCACCTGCGCTTCGACCCGGCCACCGACAGTGCCGCCGCTCGCTGGTGTGGTGCGCAAGC  
ACATGGGCGAGGAATTCACCCAGGTGCTGCCGATGGGCGCGTTCGAAAGTGGTGAGCTGCGTCC  
GCTGCGCGAGGTTGCGCTGGCCCTGCATGGCTTGGTGCGCGAAGGCGCGCAGATCCTGCGTGGC  
AACAAGAGCCACCCGATCACCAGCTTTGCGCAGGCGCAGGCCTGGCTGCTGGAAGAAGCTAAG  
CGGGGCCGCCAGGTGCAGCGCTTCAAGGGCCTGGGCGAAATGAACGCCGAGCAGTTGTGGGAA  
ACCACG

>XCC2

GAGCTGATCGAGCGGGCTACATCTACATCGGCCTGCCGCCGCTGTACAAGCTCAAGCAGGGCA  
AGAGCGAGCTGTATCTCAAGGACGACGCCGCGCTCAACGCCTACCTGGCCAGCAGCGCGGTTCG  
AAGGTGCAGCGCTGATCCCGGCCAGCGACGAGCCGCCGATCACCGGCGAGGCGCTGGAAAAA  
CTGCTGCTGTTGTTTCGCTGGCGCCAAGGAGGCCATTGCCCGCAATGCCACCGCTACGACCCGG  
CGCTGTTGACCGCGTTGATCGATCTGCCGCCGCTGGACGTGGTGCAGCTGCAGGCCGAAGGCGA  
CGTGCATCCCACGCTGGATGCGCTGCAGGCAGTGCTCAATCGCGGCACCCTGGGCACGGCGCGC  
TATCACCTGCGCTTCGACCCGGCCACCGACAGTGCCGCCGCTCGCTGGTGTGGTGCGCAAGC  
ACATGGGCGAGGAATTCACCCAGGTGCTGCCGATGGGCGCGTTCGAAAGTGGTGAGCTGCGTCC

GCTGCGGAGGTTGCGCTGGCCCTGCATGGCTTGGTGCGGAAGGCGCGCAGATCCTGCGTGGC  
AACAAAGAGCCACCCGATCACCAGCTTTGCGCAGGCGCAGGCCTGGCTGCTGGAAGAAGCTAAG  
CGGGGCCGCCAGGTGCAGCGCTTCAAGGGCCTGGGCGAAATGAACGCCGAGCAGTTGTGGGAA  
ACCACG

>XCZB1

GAGCTGATCGAGCGGGCTACATCTACATCGGCTTGCCGCCGCTGTACAAGCTCAAGCAGGGCA  
AGAGCGAGCTGTATCTCAAGGACGACGCCGCGCTCAACGCCTACCTGGCCAGCAGCGCGGTTCG  
AAGGTGCAGCGCTGATCCCGGCCAGCGACGAGCCGCCGATCACCGGCGAGGCGCTGGAAAAA  
CTGCTGCTGTTGTTTCGCTGGCGCCAAGGAGGCCATTGCCCCGAATGCCACCGCTACGACCCGG  
CGCTGTTGACCGCGTTGATCGATCTGCCGCCGCTGGACGTGGTGCAGCTGCAGGCCGAAGGCGA  
CGTGCATCCCACGCTGGATGCGCTGCAGGCAGTGCTCAATCGCGGCACCCTGGGCACGGCGCGC  
TATCACCTGCGCTTCGACCCGGCCACCGACAGTGCCGCCGCTCGCTGGTGTCCGTGCGCAAGC  
ACATGGGCGAGGAATTCACCCAGGTGCTGCCGATGGGCGCGTTCGAAAGTGGTGAGCTGCGTCC  
GCTGCGGAGGTTGCGCTGGCCCTGCATGGCTTGGTGCGGAAGGCGCGCAGATCCTGCGTGGC  
AACAAAGAGCCACCCGATCACCAGCTTTGCGCAGGCGCAGGCCTGGCTGCTGGAAGAAGCTAAG  
CGGGGCCGCCAGGTGCAGCGCTTCAAGGGCCTGGGCGAAATGAACGCCGAGCAGTTGTGGGAA  
ACCACG

>XCZB2

GAGCTGATCGAGCGGGCTACATCTACATCGGCTTGCCGCCGCTGTACAAGCTCAAGCAGGGCA  
AGAGCGAGCTGTATCTCAAGGACGACGCCGCGCTCAACGCCTACCTGGCCAGCAGCGCGGTTCG  
AAGGTGCAGCGCTGATCCCGGCCAGCGACGAGCCGCCGATCACCGGCGAGGCGCTGGAAAAA  
CTGCTGCTGTTGTTTCGCTGGCGCCAAGGAGGCCATTGCCCCGAATGCCACCGCTACGACCCGG  
CGCTGTTGACCGCGTTGATCGATCTGCCGCCGCTGGACGTGGTGCAGCTGCAGGCCGAAGGCGA  
CGTGCATCCCACGCTGGATGCGCTGCAGGCAGTGCTCAATCGCGGCACCCTGGGCACGGCGCGC  
TATCACCTGCGCTTCGACCCGGCCACCGACAGTGCCGCCGCTCGCTGGTGTCCGTGCGCAAGC  
ACATGGGCGAGGAATTCACCCAGGTGCTGCCGATGGGCGCGTTCGAAAGTGGTGAGCTGCGTCC  
GCTGCGGAGGTTGCGCTGGCCCTGCATGGCTTGGTGCGGAAGGCGCGCAGATCCTGCGTGGC  
AACAAAGAGCCACCCGATCACCAGCTTTGCGCAGGCGCAGGCCTGGCTGCTGGAAGAAGCTAAG  
CGGGGCCGCCAGGTGCAGCGCTTCAAGGGCCTGGGCGAAATGAACGCCGAGCAGTTGTGGGAA  
ACCACG

>XCZB3

GAGCTGATCGAGCGGGCTACATCTACATCGGCTTGCCGCCGCTGTACAAGCTCAAGCAGGGCA  
AGAGCGAGCTGTATCTCAAGGACGACGCCGCGCTCAACGCCTACCTGGCCAGCAGCGCGGTTCG  
AAGGTGCAGCGCTGATCCCGGCCAGCGACGAGCCGCCGATCACCGGCGAGGCGCTGGAAAAA  
CTGCTGCTGTTGTTTCGCTGGCGCCAAGGAGGCCATTGCCCCGAATGCCACCGCTACGACCCGG  
CGCTGTTGACCGCGTTGATCGATCTGCCGCCGCTGGACGTGGTGCAGCTGCAGGCCGAAGGCGA  
CGTGCATCCCACGCTGGATGCGCTGCAGGCAGTGCTCAATCGCGGCACCCTGGGCACGGCGCGC  
TATCACCTGCGCTTCGACCCGGCCACCGACAGTGCCGCCGCTCGCTGGTGTCCGTGCGCAAGC  
ACATGGGCGAGGAATTCACCCAGGTGCTGCCGATGGGCGCGTTCGAAAGTGGTGAGCTGCGTCC  
GCTGCGGAGGTTGCGCTGGCCCTGCATGGCTTGGTGCGGAAGGCGCGCAGATCCTGCGTGGC  
AACAAAGAGCCACCCGATCACCAGCTTTGCGCAGGCGCAGGCCTGGCTGCTGGAAGAAGCTAAG  
CGGGGCCGCCAGGTGCAGCGCTTCAAGGGCCTGGGCGAAATGAACGCCGAGCAGTTGTGGGAA  
ACCACG

>XCGZ1

GAGCTGATCGAGCGGGCTACATCTACATCGGCTTGCCGCCGCTGTACAAGCTCAAGCAGGGCA  
AGAGCGAGCTGTATCTCAAGGACGACGCCGCGCTCAACGCCTACCTGGCCAGCAGCGCGGTTCG  
AAGGTGCAGCGCTGATCCCGGCCAGCGACGAGCCGCCGATCACCGGCGAGGCGCTGGAAAAA  
CTGCTGCTGTTGTTTCGCTGGCGCCAAGGAGGCCATTGCCCGCAATGCCACCGCTACGACCCGG  
CGCTGTTGACCGCGTTGATCGATCTGCCGCCGCTGGACGTGGTGCAGCTGCAGGCCGAAGGCGA  
CGTGCATCCCACGCTGGATGCGCTGCAGGCAGTGCTCAATCGCGGCACCCTGGGCACGGCGCGC  
TATCACCTGCGCTTCGACCCGGCCACCGACAGTGCCGCCGCTCGCTGGTGTCCGTGCGCAAGC  
ACATGGGCGAGGAATTCACCCAGGTGCTGCCGATGGGCGCGTTCGAAAGTGGTGAGCTGCGTCC  
GCTGCGCGAGGTTGCGCTGGCCCTGCATGGCTTGGTGCGCGAAGGCGCGCAGATCCTGCGTGGC  
AACAAGAGCCACCCGATCACCAGCTTTGCGCAGGCGCAGGCCTGGCTGCTGGAAGAAGCTAAG  
CGGGGCCGCCAGGTGCAGCGCTTCAAGGGCCTGGGCGAAATGAACGCCGAGCAGTTGTGGGAA  
ACCACG

>XCGZ2

GAGCTGATCGAGCGGGCTACATCTACATCGGCTTGCCGCCGCTGTACAAGCTCAAGCAGGGCA  
AGAGCGAGCTGTATCTCAAGGACGACGCCGCGCTCAACGCCTACCTGGCCAGCAGCGCGGTTCG  
AAGGTGCAGCGCTGATCCCGGCCAGCGACGAGCCGCCGATCACCGGCGAGGCGCTGGAAAAA  
CTGCTGCTGTTGTTTCGCTGGCGCCAAGGAGGCCATTGCCCGCAATGCCACCGCTACGACCCGG  
CGCTGTTGACCGCGTTGATCGATCTGCCGCCGCTGGACGTGGTGCAGCTGCAGGCCGAAGGCGA  
CGTGCATCCCACGCTGGATGCGCTGCAGGCAGTGCTCAATCGCGGCACCCTGGGCACGGCGCGC  
TATCACCTGCGCTTCGACCCGGCCACCGACAGTGCCGCCGCTCGCTGGTGTCCGTGCGCAAGC  
ACATGGGCGAGGAATTCACCCAGGTGCTGCCGATGGGCGCGTTCGAAAGTGGTGAGCTGCGTCC  
GCTGCGCGAGGTTGCGCTGGCCCTGCATGGCTTGGTGCGCGAAGGCGCGCAGATCCTGCGTGGC  
AACAAGAGCCACCCGATCACCAGCTTTGCGCAGGCGCAGGCCTGGCTGCTGGAAGAAGCTAAG  
CGGGGCCGCCAGGTGCAGCGCTTCAAGGGCCTGGGCGAAATGAACGCCGAGCAGTTGTGGGAA  
ACCACG

>XCHN1

GAGCTGATCGAGCGGGCTACATCTACATCGGCTTGCCGCCGCTGTACAAGCTCAAGCAGGGCA  
AGAGCGAGCTGTATCTCAAGGACGACGCCGCGCTCAACGCCTACCTGGCCAGCAGCGCGGTTCG  
AAGGTGCAGCGCTGATCCCGGCCAGCGACGAGCCGCCGATCACCGGCGAGGCGCTGGAAAAA  
CTGCTGCTGTTGTTTCGCTGGCGCCAAGGAGGCCATTGCCCGCAATGCCACCGCTACGACCCGG  
CGCTGTTGACCGCGTTGATCGATCTGCCGCCGCTGGACGTGGTGCAGCTGCAGGCCGAAGGCGA  
CGTGCATCCCACGCTGGATGCGCTGCAGGCAGTGCTCAATCGCGGCACCCTGGGCACGGCGCGC  
TATCACCTGCGCTTCGACCCGGCCACCGACAGTGCCGCCGCTCGCTGGTGTCCGTGCGCAAGC  
ACATGGGCGAGGAATTCACCCAGGTGCTGCCGATGGGCGCGTTCGAAAGTGGTGAGCTGCGTCC  
GCTGCGCGAGGTTGCGCTGGCCCTGCATGGCTTGGTGCGCGAAGGCGCGCAGATCCTGCGTGGC  
AACAAGAGCCACCCGATCACCAGCTTTGCGCAGGCGCAGGCCTGGCTGCTGGAAGAAGCTAAG  
CGGGGCCGCCAGGTGCAGCGCTTCAAGGGCCTGGGCGAAATGAACGCCGAGCAGTTGTGGGAA  
ACCACG

>XCHN2

GAGCTGATCGAGCGGGCTACATCTACATCGGCTTGCCGCCGCTGTACAAGCTCAAGCAGGGCA  
AGAGCGAGCTGTATCTCAAGGACGACGCCGCGCTCAACGCCTACCTGGCCAGCAGCGCGGTTCG  
AAGGTGCAGCGCTGATCCCGGCCAGCGACGAGCCGCCGATCACCGGCGAGGCGCTGGAAAAA  
CTGCTGCTGTTGTTTCGCTGGCGCCAAGGAGGCCATTGCCCGCAATGCCACCGCTACGACCCGG  
CGCTGTTGACCGCGTTGATCGATCTGCCGCCGCTGGACGTGGTGCAGCTGCAGGCCGAAGGCGA



CGTGCATCCCACGCTGGATGCGCTGCAGGCAGTGCTCAATCGCGGCACCCTGGGCACGGCGCGC  
TATCACCTGCGCTTCGACCCGGCCACCGACAGTGCCGCCGCTCGCTGGTGTCCGTGCGCAAGC  
ACATGGGCGAGGAATTCACCCAGGTGCTGCCGATGGGCGCGTTCGAAAGTGGTGAGCTGCGTCC  
GCTGCGCGAGGTTGCGCTGGCCCTGCATGGCTTGGTGC GCGAAGGCGCGCAGATCCTGCGTGGC  
AACAAAGAGCCACCCGATCACCAGCTTTGCGCAGGCGCAGGCCTGGCTGCTGGAAGAAGCTAAG  
CGGGGCCGCCAGGTGCAGCGCTTCAAGGGCCTGGGCGAAATGAACGCCGAGCAGTTGTGGGAA  
ACCACG

>XCNM2

GAGCTGATCGAGCGGGCTACATCTACATCGGCTTGCCGCCGCTGTACAAGCTCAAGCAGGGCA  
AGAGCGAGCTGTATCTCAAGGACGACGCCGCGCTCAACGCCTACCTGGCCAGCAGCGCGGTGCG  
AAGGTGCAGCGCTGATCCCGGCCAGCGACGAGCCGCCGATCACCGGCGAGGCGCTGGAAAAA  
CTGCTGCTGTTGTTGCTGGCGCCAAGGAGGCCATTGCCCGCAATGCCACCGCTACGACCCGG  
CGCTGTTGACCGCGTTGATCGATCTGCCGCCGCTGGACGTGGTGCAGCTGCAGGCCGAAGGGCA  
CGTGCATCCCACGCTGGATGCGCTGCAGGCAGTGCTCAATCGCGGCACCCTGGGCACGGCGCGC  
TATCACCTGCGCTTCGACCCGGCCACCGACAGTGCCGCCGCTCGCTGGTGTCCGTGCGCAAGC  
ACATGGGCGAGGAATTCACCCAGGTGCTGCCGATGGGCGCGTTCGAAAGTGGTGAGCTGCGTCC  
GCTGCGCGAGGTTGCGCTGGCCCTGCATGGCTTGGTGC GCGAAGGCGCGCAGATCCTGCGTGGC  
AACAAAGAGCCACCCGATCACCAGCTTTGCGCAGGCGCAGGCCTGGCTGCTGGAAGAAGCTAAG  
CGGGGCCGCCAGGTGCAGCGCTTCAAGGGCCTGGGCGAAATGAACGCCGAGCAGTTGTGGGAA  
ACCACG

>XCXZ2

GAGCTGATCGAGCGGGCTACATCTACATCGGCTTGCCGCCGCTGTACAAGCTCAAGCAGGGCA  
AGAGCGAGCTGTATCTCAAGGACGACGCCGCGCTCAACGCCTACCTGGCCAGCAGCGCGGTGCG  
AAGGTGCAGCGCTGATCCCGGCCAGCGACGAGCCGCCGATCACCGGCGAGGCGCTGGAAAAA  
CTGCTGCTGTTGTTGCTGGCGCCAAGGAGGCCATTGCCCGCAATGCCACCGCTACGACCCGG  
CGCTGTTGACCGCGTTGATCGATCTGCCGCCGCTGGACGTGGTGCAGCTGCAGGCCGAAGGGCA  
CGTGCATCCCACGCTGGATGCGCTGCAGGCAGTGCTCAATCGCGGCACCCTGGGCACGGCGCGC  
TATCACCTGCGCTTCGACCCGGCCACCGACAGTGCCGCCGCTCGCTGGTGTCCGTGCGCAAGC  
ACATGGGCGAGGAATTCACCCAGGTGCTGCCGATGGGCGCGTTCGAAAGTGGTGAGCTGCGTCC  
GCTGCGCGAGGTTGCGCTGGCCCTGCATGGCTTGGTGC GCGAAGGCGCGCAGATCCTGCGTGGC  
AACAAAGAGCCACCCGATCACCAGCTTTGCGCAGGCGCAGGCCTGGCTGCTGGAAGAAGCTAAG  
CGGGGCCGCCAGGTGCAGCGCTTCAAGGGCCTGGGCGAAATGAACGCCGAGCAGTTGTGGGAA  
ACCACG

>XCJY

GAGCTGATCGAGCGGGCTACATCTACATCGGCTTGCCGCCGCTGTACAAGCTCAAGCAGGGCA  
AGAGCGAGCTGTATCTCAAGGACGACGCCGCGCTCAACGCCTACCTGGCCAGCAGCGCGGTGCG  
AAGGTGCAGCGCTGATCCCGGCCAGCGACGAGCCGCCGATCACCGGCGAGGCGCTGGAAAAA  
CTGCTGCTGTTGTTGCTGGCGCCAAGGAGGCCATTGCCCGCAATGCCACCGCTACGACCCGG  
CGCTGTTGACCGCGTTGATCGATCTGCCGCCGCTGGACGTGGTGCAGCTGCAGGCCGAAGGGCA  
CGTGCATCCCACGCTGGATGCGCTGCAGGCAGTGCTCAATCGCGGCACCCTGGGCACGGCGCGC  
TATCACCTGCGCTTCGACCCGGCCACCGACAGTGCCGCCGCTCGCTGGTGTCCGTGCGCAAGC  
ACATGGGCGAGGAATTCACCCAGGTGCTGCCGATGGGCGCGTTCGAAAGTGGTGAGCTGCGTCC  
GCTGCGCGAGGTTGCGCTGGCCCTGCATGGCTTGGTGC GCGAAGGCGCGCAGATCCTGCGTGGC  
AACAAAGAGCCACCCGATCACCAGCTTTGCGCAGGCGCAGGCCTGGCTGCTGGAAGAAGCTAAG  
CGGGGCCGCCAGGTGCAGCGCTTCAAGGGCCTGGGCGAAATGAACGCCGAGCAGTTGTGGGAA  
ACCACG

CGGGGCCGCCAGGTGCAGCGCTTCAAGGGCCTGGGCGAAATGAACGCCGAGCAGTTGTGGGAA  
ACCACG

>XCTY

GAGCTGATCGAGCGGGCTACATCTACATCGGCTTGCCGCCGCTGTACAAGCTCAAGCAGGGCA  
AGAGCGAGCTGTATCTCAAGGACGACGCCGCGCTCAACGCCTACCTGGCCAGCAGCGCGGTTCG  
AAGGTGCAGCGCTGATCCCGGCCAGCGACGAGCCGCCGATCACCGGCGAGGCGCTGGAAAAA  
CTGCTGCTGTTGTTTCGCTGGCGCCAAGGAGGCCATTGCCCCGAATGCCACCGCTACGACCCGG  
CGTGTGTGACCGCGTTGATCGATCTGCCGCCGCTGGACGTGGTGCAGCTGCAGGCCGAAGGCGA  
CGTGCATCCCACGCTGGATGCGCTGCAGGCAGTGCTCAATCGCGGCACCCTGGGCACGGCGCGC  
TATCACCTGCGCTTCGACCCGGCCACCGACAGTGCCGCCGCTCGCTGGTGTTCGGTGCGCAAGC  
ACATGGGCGAGGAATTCACCCAGGTGCTGCCGATGGGCGCGTTCGAAAGTGGTGCAGCTGCGTCC  
GCTGCGCGAGGTTGCGCTGGCCCTGCATGGCTTGGTGCGCGAAGGCGCGCAGATCCTGCGTGGC  
AACAAAGAGCCACCCGATCACCCAGCTTTGCGCAGGCGCAGGCCTGGCTGCTGGAAGAAGCTAAG  
CGGGGCCGCCAGGTGCAGCGCTTCAAGGGCCTGGGCGAAATGAACGCCGAGCAGTTGTGGGAA  
ACCACG

>XCNM1

GAGCTGATCGAGCGGGCTACATCTACATCGGCTTGCCGCCGCTGTACAAGCTCAAGCAGGGCA  
AGAGCGAGCTGTATCTCAAGGACGACGCCGCGCTCAACGCCTACCTGGCCAGCAGCGCGGTTCG  
AAGGTGCAGCGCTGATCCCGGCCAGCGACGAGCCGCCGATCACCGGCGAGGCGCTGGAAAAA  
CTGCTGCTGTTGTTTCGCTGGCGCCAAGGAGGCCATTGCCCCGAATGCCACCGCTACGACCCGG  
CGTGTGTGACCGCGTTGATCGATCTGCCGCCGCTGGACGTGGTGCAGCTGCAGGCCGAAGGCGA  
CGTGCATCCCACGCTGGATGCGCTGCAGGCAGTGCTCAATCGCGGCACCCTGGGCACGGCGCGC  
TATCACCTGCGCTTCGACCCGGCCACCGACAGTGCCGCCGCTCGCTGGTGTTCGGTGCGCAAGC  
ACATGGGCGAGGAATTCACCCAGGTGCTGCCGATGGGCGCGTTCGAAAGTGGTGCAGCTGCGTCC  
GCTGCGCGAGGTTGCGCTGGCCCTGCATGGCTTGGTGCGCGAAGGCGCGCAGATCCTGCGTGGC  
AACAAAGAGCCACCCGATCACCCAGCTTTGCGCAGGCGCAGGCCTGGCTGCTGGAAGAAGCTAAG  
CGGGGCCGCCAGGTGCAGCGCTTCAAGGGCCTGGGCGAAATGAACGCCGAGCAGTTGTGGGAA  
ACCACG

>XCGZ3

GAGCTGATCGAGCGGGCTACATCTACATCGGCTTGCCGCCGCTGTACAAGCTCAAGCAGGGCA  
AGAGCGAGCTGTATCTCAAGGACGACGCCGCGCTCAACGCCTACCTGGCCAGCAGCGCGGTTCG  
AAGGTGCAGCGCTGATCCCGGCCAGCGACGAGCCGCCGATCACCGGCGAGGCGCTGGAAAAA  
CTGCTGCTGTTGTTTCGCTGGCGCCAAGGAGGCCATTGCCCCGAATGCCACCGCTACGACCCGG  
CGTGTGTGACCGCGTTGATCGATCTGCCGCCGCTGGACGTGGTGCAGCTGCAGGCCGAAGGCGA  
CGTGCATCCCACGCTGGATGCGCTGCAGGCAGTGCTCAATCGCGGCACCCTGGGCACGGCGCGC  
TATCACCTGCGCTTCGACCCGGCCACCGACAGTGCCGCCGCTCGCTGGTGTTCGGTGCGCAAGC  
ACATGGGCGAGGAATTCACCCAGGTGCTGCCGATGGGCGCGTTCGAAAGTGGTGCAGCTGCGTCC  
GCTGCGCGAGGTTGCGCTGGCCCTGCATGGCTTGGTGCGCGAAGGCGCGCAGATCCTGCGTGGC  
AACAAAGAGCCACCCGATCACCCAGCTTTGCGCAGGCGCAGGCCTGGCTGCTGGAAGAAGCTAAG  
CGGGGCCGCCAGGTGCAGCGCTTCAAGGGCCTGGGCGAAATGAACGCCGAGCAGTTGTGGGAA  
ACCACG

>XCC4

GAGCTGATCGAGCGGGCTACATCTACATCGGCTTGCCGCCGCTGTACAAGCTCAAGCAGGGCA  
AGAGCGAGCTGTATCTCAAGGACGACGCCGCGCTCAACGCCTACCTGGCCAGCAGCGCGGTTCG

AAGGTGCAGCGCTGATCCCGGCCAGCGACGAGCCGCCGATCACCGGCGAGGCGCTGGAAAAA  
CTGCTGCTGTTGTTTCGCTGGCGCCAAGGAGGCCATTGCCCCGAATGCCACCGCTACGACCCGG  
CGCTGTTGACCGCGTTGATCGATCTGCCGCCGCTGGACGTGGTGCAGCTGCAGGCCGAAGGCGA  
CGTGCATCCCACGCTGGATGCGCTGCAGGCAGTGCTCAATCGCGGCACCCTGGGCACGGCGCGC  
TATCACCTGCGCTTCGACCCGGCCACCGACAGTGCCGCCGCTCGCTGGTGTCCGTGCGCAAGC  
ACATGGGCGAGGAATTCACCCAGGTGCTGCCGATGGGCGCGTTCGAAAAGTGGTGAGCTGCGTCC  
GCTGCGCGAGGTTGCGCTGGCCCTGCATGGCTTGGTGC GCGAAGGCGCGCAGATCCTGCGTGGC  
AACAAAGAGCCACCCGATCACCAGCTTTGCGCAGGCGCAGGCCTGGCTGCTGGAAGAAGCTAAG  
CGGGGCCGCCAGGTGCAGCGCTTCAAGGGCCTGGGCGAAATGAACGCCGAGCAGTTGTGGGAA  
ACCACG

>XCXZ1

GAGCTGATCGAGCGGGCTACATCTACATCGGCTTGCCGCCGCTGTACAAGCTCAAGCAGGGCA  
AGAGCGAGCTGTATCTCAAGGACGACGCCGCGCTCAACGCCTACCTGGCCAGCAGCGCGGTTCG  
AAGGTGCAGCGCTGATCCCGGCCAGCGACGAGCCGCCGATCACCGGCGAGGCGCTGGAAAAA  
CTGCTGCTGTTGTTTCGCTGGCGCCAAGGAGGCCATTGCCCCGAATGCCACCGCTACGACCCGG  
CGCTGTTGACCGCGTTGATCGATCTGCCGCCGCTGGACGTGGTGCAGCTGCAGGCCGAAGGCGA  
CGTGCATCCCACGCTGGATGCGCTGCAGGCAGTGCTCAATCGCGGCACCCTGGGCACGGCGCGC  
TATCACCTGCGCTTCGACCCGGCCACCGACAGTGCCGCCGCTCGCTGGTGTCCGTGCGCAAGC  
ACATGGGCGAGGAATTCACCCAGGTGCTGCCGATGGGCGCGTTCGAAAAGTGGTGAGCTGCGTCC  
GCTGCGCGAGGTTGCGCTGGCCCTGCATGGCTTGGTGC GCGAAGGCGCGCAGATCCTGCGTGGC  
AACAAAGAGCCACCCGATCACCAGCTTTGCGCAGGCGCAGGCCTGGCTGCTGGAAGAAGCTAAG  
CGGGGCCGCCAGGTGCAGCGCTTCAAGGGCCTGGGCGAAATGAACGCCGAGCAGTTGTGGGAA  
ACCACG

>XCGY4

GAGCTGATCGAGCGGGCTACATCTACATCGGCTTGCCGCCGCTGTACAAGCTCAAGCAGGGCA  
AGAGCGAGCTGTATCTCAAGGACGACGCCGCGCTCAACGCCTACCTGGCCAGCAGCGCGGTTCG  
AAGGTGCAGCGCTGATCCCGGCCAGCGACGAGCCGCCGATCACCGGCGAGGCGCTGGAAAAA  
CTGCTGCTGTTGTTTCGCTGGCGCCAAGGAGGCCATTGCCCCGAATGCCACCGCTACGACCCGG  
CGCTGTTGACCGCGTTGATCGATCTGCCGCCGCTGGACGTGGTGCAGCTGCAGGCCGAAGGCGA  
CGTGCATCCCACGCTGGATGCGCTGCAGGCAGTGCTCAATCGCGGCACCCTGGGCACGGCGCGC  
TATCACCTGCGCTTCGACCCGGCCACCGACAGTGCCGCCGCTCGCTGGTGTCCGTGCGCAAGC  
ACATGGGCGAGGAATTCACCCAGGTGCTGCCGATGGGCGCGTTCGAAAAGTGGTGAGCTGCGTCC  
GCTGCGCGAGGTTGCGCTGGCCCTGCATGGCTTGGTGC GCGAAGGCGCGCAGATCCTGCGTGGC  
AACAAAGAGCCACCCGATCACCAGCTTTGCGCAGGCGCAGGCCTGGCTGCTGGAAGAAGCTAAG  
CGGGGCCGCCAGGTGCAGCGCTTCAAGGGCCTGGGCGAAATGAACGCCGAGCAATTGTGGGAA  
ACCACG

>XCAW2

GAGCTGATCGAGCGGGCTACATCTACATCGGCTTGCCGCCGCTGTACAAGCTCAAGCAGGGCA  
AGAGCGAGCTGTATCTCAAGGACGACGCCGCGCTCAACGCCTACCTGGCCAGCAGCGCGGTTCG  
AAGGTGCAGCGCTGATCCCGGCCAGCGACGAGCCGCCGATCACCGGCGAGGCGCTGGAAAAA  
CTGCTGCTGTTGTTTCGCTGGCGCCAAGGAGGCCATTGCCCCGAATGCCACCGCTACGACCCGG  
CGCTGTTGACCGCGTTGATCGATCTGCCGCCGCTGGACGTGGTGCAGCTGCAGGCCGAAGGCGA  
CGTGCATCCCACGCTGGATGCGCTGCAGGCAGTGCTCAATCGCGGCACCCTGGGCACGGCGCGC  
TATCACCTGCGCTTCGACCCGGCCACCGACAGTGCCGCCGCTCGCTGGTGTCCGTGCGCAAGC

ACATGGGCGAGGAATTCACCCAGGTGCTGCCGATGGGCGCGTTCGAAAAGTGGTGAGCTGCGTCC  
GCTGCGCGAGGTTGCGCTGGCCCTGCATGGCTTGGTGC CGGAAGGCGCGCAGATCCTGCGTGGC  
AA CAAGAGCCACCCGATCACCAGCTTTGCGCAGGCGCAGGCCTGGCTGCTGGAAGAAGCTAAG  
CGGGGCCGCCAGGTGCAGCGCTTCAAGGGCCTGGGCGAAATGAACGCCGAGCAGTTGTGGGAA  
ACCACG

>XCAW3

GAGCTGATCGAGCGGGCTACATCTACATCGGCTTGCCGCCGCTGTACAAGCTCAAGCAGGGCA  
AGAGCGAGCTGTATCTCAAGGACGACGCCGCGCTCAACGCCTACCTGGCCAGCAGCGCGGTTCG  
AAGGTGCAGCGCTGATCCCGGCCAGCGACGAGCCGCCGATCACCGGCGAGGCGCTGGAAAAA  
CTGCTGCTGTTGTTTCGCTGGCGCCAAGGAGGCCATTGCCCGCAATGCCACCGCTACGACCCGG  
CGCTGTTGACCGGTTGATCGATCTGCCGCCGCTGGACGTGGTGCAGCTGCAGGCCGAAGGCGA  
CGTGCATCCCACGCTGGATGCGCTGCAGGCAGTGCTCAATCGCGGCACCCTGGGCACGGCGCGC  
TATCACCTGCGCTTCGACCCGGCCACCGACAGTGCCGCCGCTCGCTGGTGTCCGTGCGCAAGC  
ACATGGGCGAGGAATTCACCCAGGTGCTGCCGATGGGCGCGTTCGAAAAGTGGTGAGCTGCGTCC  
GCTGCGCGAGGTTGCGCTGGCCCTGCATGGCTTGGTGC CGGAAGGCGCGCAGATCCTGCGTGGC  
AA CAAGAGCCACCCGATCACCAGCTTTGCGCAGGCGCAGGCCTGGCTGCTGGAAGAAGCTAAG  
CGGGGCCGCCAGGTGCAGCGCTTCAAGGGCCTGGGCGAAATGAACGCCGAGCAGTTGTGGGAA  
ACCACG

>race 1

GAGCTGATCGAGCGGGCTACATCTACATCGGCTTGCCGCCGCTGTACAAGCTCAAGCAGGGCA  
AGAGCGAGCTGTATCTCAAGGACGACGCCGCGCTCAACGCCTACCTGGCCAGCAGCGCGGTTCG  
AAGGTGCAGCGCTGATCCCGGCCAGCGACGAGCCGCCGATCACCGGCGAGGCGCTGGAAAAA  
CTGCTGCTGTTGTTTCGCTGGCGCCAAGGAGGCCATTGCCCGCAATGCCACCGCTACGACCCGG  
CGCTGTTGACCGGTTGATCGATCTGCCGCCGCTGGACGTGGTGCAGCTGCAGGCCGAAGGCGA  
CGTGCATCCCACGCTGGATGCGCTGCAGGCAGTGCTCAATCGCGGCACCCTGGGCACGGCGCGC  
TATCACCTGCGCTTCGACCCGGCCACCGACAGTGCCGCCGCTCGCTGGTGTCCGTGCGCAAGC  
ACATGGGCGAGGAATTCACCCAGGTGCTGCCGATGGGCGCGTTCGAAAAGTGGTGAGCTGCGTCC  
GCTGCGCGAGGTTGCGCTGGCCCTGCATGGCTTGGTGC CGGAAGGCGCGCAGATCCTGCGTGGC  
AA CAAGAGCCACCCGATCACCAGCTTTGCGCAGGCGCAGGCCTGGCTGCTGGAAGAAGCTAAG  
CGGGGCCGCCAGGTGCAGCGCTTCAAGGGCCTGGGCGAAATGAACGCCGAGCAGTTGTGGGAA  
ACCACG

>race 2

GAGCTGATCGAGCGGGCTACATCTACATCGGCTTGCCGCCGCTGTACAAGCTCAAGCAGGGCA  
AGAGCGAGCTGTATCTCAAGGACGACGCCGCGCTCAACGCCTACCTGGCCAGCAGCGCGGTTCG  
AAGGTGCAGCGCTGATCCCGGCCAGCGACGAGCCGCCGATCACCGGCGAGGCGCTGGAAAAA  
CTGCTGCTGTTGTTTCGCTGGCGCCAAGGAGGCCATTGCCCGCAATGCCACCGCTACGACCCGG  
CGCTGTTGACCGGTTGATCGATCTGCCGCCGCTGGACGTGGTGCAGCTGCAGGCCGAAGGCGA  
CGTGCATCCCACGCTGGATGCGCTGCAGGCAGTGCTCAATCGCGGCACCCTGGGCACGGCGCGC  
TATCACCTGCGCTTCGACCCGGCCACCGACAGTGCCGCCGCTCGCTGGTGTCCGTGCGCAAGC  
ACATGGGCGAGGAATTCACCCAGGTGCTGCCGATGGGCGCGTTCGAAAAGTGGTGAGCTGCGTCC  
GCTGCGCGAGGTTGCGCTGGCCCTGCATGGCTTGGTGC CGGAAGGCGCGCAGATCCTGCGTGGC  
AA CAAGAGCCACCCGATCACCAGCTTTGCGCAGGCGCAGGCCTGGCTGCTGGAAGAAGCTAAG  
CGGGGCCGCCAGGTGCAGCGCTTCAAGGGCCTGGGCGAAATGAACGCCGAGCAGTTGTGGGAA  
ACCACG

>race 3

GAGCTGATCGAGCGGGCTACATCTACATCGGCCTGCCGCCGCTGTACAAGCTCAAGCAGGGCA  
AGAGCGAGCTGTATCTCAAGGACGACGCCGCGCTCAACGCCTACCTGGCCAGCAGCGCGGTTCG  
AAGGTGCAGCGCTGATCCCGGCCAGCGACGAGCCGCCGATCACCGGCGAGGCGCTGGAAAAA  
CTGCTGCTGTTGTTTCGCTGGCGCCAAGGAGGCCATTGCCCGCAATGCCACCGCTACGACCCGG  
CGCTGTTGACCGCGTTGATCGATCTGCCGCCGCTGGACGTGGTGCAGCTGCAGGCCGAAGGCGA  
CGTGCATCCCACGCTGGATGCGCTGCAGGCAGTGCTCAATCGCGGCACCCTGGGCACGGCGCGC  
TATCACCTGCGCTTCGACCCGGCCACCGACAGTGCCGCCGCTCGCTGGTGTCCGTGCGCAAGC  
ACATGGGCGAGGAATTCACCCAGGTGCTGCCGATGGGCGCGTTCGAAAGTGGTGAGCTGCGTCC  
GCTGCGCGAGGTTGCGCTGGCCCTGCATGGCTTGGTGCAGGCGAAGGCGCGCAGATCCTGCGTGGC  
AAACAAGAGCCACCCGATCACCAGCTTTGCGCAGGCGCAGGCCTGGCTGCTGGAAGAAGCTAAG  
CGGGGCCGCCAGGTGCAGCGCTTCAAGGGCCTGGGCGAAATGAACGCCGAGCAGTTGTGGGAA  
ACCACG

>race 4

GAGCTGATCGAGCGGGCTACATCTACATCGGCCTGCCGCCGCTGTACAAGCTCAAGCAGGGCA  
AGAGCGAGCTGTATCTCAAGGACGACGCCGCGCTCAACGCCTACCTGGCCAGCAGCGCGGTTCG  
AAGGTGCAGCGCTGATCCCGGCCAGCGACGAGCCGCCGATCACCGGCGAGGCGCTGGAAAAA  
CTGCTGCTGTTGTTTCGCTGGCGCCAAGGAGGCCATTGCCCGCAATGCCACCGCTACGACCCGG  
CGCTGTTGACCGCGTTGATCGATCTGCCGCCGCTGGACGTGGTGCAGCTGCAGGCCGAAGGCGA  
CGTGCATCCCACGCTGGATGCGCTGCAGGCAGTGCTCAATCGCGGCACCCTGGGCACGGCGCGC  
TATCACCTGCGCTTCGACCCGGCCACCGACAGTGCCGCCGCTCGCTGGTGTCCGTGCGCAAGC  
ACATGGGCGAGGAATTCACCCAGGTGCTGCCGATGGGCGCGTTCGAAAGTGGTGAGCTGCGTCC  
GCTGCGCGAGGTTGCGCTGGCCCTGCATGGCTTGGTGCAGGCGAAGGCGCGCAGATCCTGCGTGGC  
AAACAAGAGCCACCCGATCACCAGCTTTGCGCAGGCGCAGGCCTGGCTGCTGGAAGAAGCTAAG  
CGGGGCCGCCAGGTGCAGCGCTTCAAGGGCCTGGGCGAAATGAACGCCGAGCAATTGTGGGAA  
ACCACG

>race 5

GAGCTGATTGAGCGGGCTACATCTACATCGGCCTGCCGCCGCTGTACAAGCTCAAGCAGGGCA  
AGAGCGAGCTGTATCTCAAGGACGATGCTGCACTCAACGCCTACCTGGCCAGCAGCGCGGTTCG  
AGGGTGCAGCGTTGATCCCGGCCAGCGACGAGCCGCCGATCACCGGCGAGGCGCTGGAAAAA  
CTGCTGCTGTTGTTTCGCTGGCGCCAAGGAGGCCATTGCCCGTAAACGCCACCGCTACGACCCGG  
CGCTGTTGACCGCGTTGATCGATCTGCCGCCGCTGGACGTGGTGCAGCTGCAGGCCGAAGGCGA  
CGTGCATCCCACGCTGGATGCGCTGCAGGCAGTGCTCAACCGCGGCACCCTGGGCACGGCGCGC  
CTATCACCTGCGCTTCGACCCGGCCACCGACAGTGCCGCCGCTCGCTGGTGTCCGTGCGCAAG  
CACATGGGCGAGGAATTCACCCAGGTGCTGCCGATGGGCGCGTTCGAAAGTGGTGAGCTGCGTC  
CGCTGCGCGAGGTTGCGCTGGCCCTGCATGGCTTGGTGCAGGCGAAGGCGCGCAGATCCTGCGTGG  
CAACAAGAGCCACCCGATCACCAGCTTTGCGCAGGCGCAAGCCTGGCTGCTGGAAGAAGCTAA  
GCGGGGCCGCCAGGTGCAGCGCTTCAAGGGCCTGGGCGAAATGAACGCCGAGCAGTTGTGGGA  
AACCACG

>race 6

GAGCTGATCGAGCGGGCTACATCTACATCGGCCTGCCGCCGCTGTACAAGCTCAAGCAGGGCA  
AGAGCGAGCTGTATCTCAAGGACGACGCCGCGCTCAACGCCTACCTGGCCAGCAGCGCGGTTCG  
AAGGTGCAGCGCTGATCCCGGCCAGCGACGAGCCGCCGATCACCGGCGAGGCGCTGGAAAAA  
CTGCTGCTGTTGTTTCGCTGGCGCCAAGGAGGCCATTGCCCGCAATGCCACCGCTACGACCCGG

CGCTGTTGACCGGTTGATCGATCTGCCGCCGCTGGACGTGGTGCAGCTGCAGGCCGAAGGCGA  
CGTGCATCCCACGCTGGATGCGCTGCAGGCAGTGCTCAATCGCGGCACCCTGGGCACGGCGCGC  
TATCACCTGCGCTTCGACCCGGCCACCGACAGTGCCGCCGCTCGCTGGTGTCCGTGCGCAAGC  
ACATGGGCGAGGAATTCACCCAGGTGCTGCCGATGGGCGCGTTCGAAAGTGGTGAGCTGCGTCC  
GCTGCGCGAGGTTGCGCTGGCCCTGCATGGCTTGGTGCGCGAAGGCGCGCAGATCCTGCGTGGC  
AACAAAGAGCCACCCGATCACCAGCTTTGCGCAGGCGCAGGCCTGGCTGCTGGAAGAAGCCAAG  
CGGGGCCGCCAGGTGCAGCGCTTCAAGGGCCTGGGCGAAATGAACGCCGAGCAGTTGTGGGAA  
ACCACG

>race 9

GAGCTGATCGAGCGGGCTACATCTACATCGGCCTGCCGCCGCTGTACAAGCTCAAGCAGGGCA  
AGAGCGAGCTGTATCTCAAGGACGACGCCGCGCTCAACGCCTACCTGGCCAGCAGCGCGGTCC  
AAGGTGCAGCGCTGATCCCAGCCAGCGACGAGCCGCCGATCACCGGCGAGGCGCTGGAAAAA  
CTGCTGCTGTGTTCGCTGGCGCCAAGGAGGCCATTGCCCGCAATGCCACCCTACGACCCGG  
CGCTGTTGACCGGTTGATCGATCTGCCGCCGCTGGACGTGGTGCAGCTGCAGGCCGAAGGCGA  
CGTGCATCCCACGCTGGATGCGCTGCAGGCAGTGCTCAATCGCGGCACCCTGGGCACGGCGCGC  
TATCACCTGCGCTTCGACCCGGCCACCGACAGTGCCGCCGCTCGCTGGTGTCCGTGCGCAAGC  
ACATGGGCGAGGAATTCACCCAGGTGCTGCCGATGGGCGCGTTCGAAAGTGGTGAGCTGCGTCC  
GCTGCGCGAGGTTGCGCTGGCCCTGCATGGCTTGGTGCGCGAAGGCGCGCAGATCCTGCGTGGC  
AACAAAGAGCCACCCGATCACCAGCTTTGCGCAGGCGCAGGCCTGGCTGCTGGAAGAAGCTAAG  
CGGGGCCGCCAGGTGCAGCGCTTCAAGGGCCTGGGCGAAATGAACGCCGAGCAGTTGTGGGAA  
ACCACG

*rpoD* (RNA polymerase sigma-70 factor)

>XCHZ1

ATGCGCGAAATGGGCACGGTTGAGCTGCTGACCCGCGAAGGCGAAATCGCCATCGCCAAGCGC  
ATCGAAGAAGGTCTGAGCCAGGTCCAGGCAGCACTGGGCGTGTCCCGCTGTCCGACCGAAATG  
CTGCTGGCCGATTACGAAGCGCACAAGGAAGGCAAGAAGCGTCTGGCCGAGATCGTGGTCCGC  
TTCAACGACCTGATTGAAGAAGCCGACGCTGCCGCCGCTGCACTGGCCGCTGCCGGCCCGGTCCG  
CCGTGGACGAAGACGCGGTCGATGAAGATGACGACGAAGACGGCGACGACGACGCTGCCGAG  
GAAGAGGCCGGCCCGACCGGTCCGGACCCGGTGGAAAGTGGCCACGCGCATGGAGAACCTCGC  
CAACGAATACGCCAAGTTCAAGAAGATCTACGCCAAGAACGGCGCCGAGCACAAGCTGGTGGT  
CAAGGCGCGCGAAGACATGGCCGCCATTTACCACACTCAAGCTGCCGCTGCCGCTGACCGAT  
GCGCTGGTCAACCGAGTTGCGTGGCGTGGTCAACGGCATCAAGGACCACGAGCGCAAGGTGCTG  
CACCTGGCGACCACCGTGGCGCGCATGCCGCGCAAGGACTTCATCCGTTCTGTGGGAAGGCAAC  
CAGACCAACCTGGAATGGGTGGAAGACGCACTCAAGCGCAAGCAGAAGTGGTTCGTCCGGCT  
GCGCGACGTCAAGGACCAGATCGTCTCCGAGCAGCAGGGTTCGATCGAGATGGAAAAGGCGAA  
CTACCTCACCCCTGGCCGAGATCAAGGACATCAGCCGTGCGATGGCCTACGGC

>XCNS

ATGCGCGAAATGGGCACGGTTCGAGCTGCTGACCCGCGAAGGCGAAATCGCCATCGCCAAGCGT  
ATCGAAGAGGGCCTGAGCCAGGTCCAGGCCCACTGGGTACGTTCCCGCTGTCCGACCGAGCTG  
CTGCTGTCCGATTACGAAGCGCACAAGGAAGGCAAGAAGCGCCTGGCCGAGATCGTGGTCCGC  
TTCAACGACCTGATCGAAGAAGCCGACGCTGCCGCTGCAGCGCTGGCCGCTGCCGGCCCGGTCC  
GCCGTTGACGAAGATGCGGTGGACGAAGACGACGACGAAGACGGCGATGACGACGCTGCCGA

GGAAGAAGCCGGCCCCGACCGGTCCGGACCCGGTGGAAAGTTGCCACGCGCATGGAGAACCTGG  
CCAACGAGTACGCCAAGTTCAAGAAGGCCTACGTCAAGTATGGCGCCGAGCACAAGAATGTGG  
CCAAGGCGCGGAAGACATGGCCGCCATCTTACCACACTCAAGCTGCCGCTGCCGCTGACCG  
ATGCGCTGGTACCCAGTTGCGTGGCGTGGTCAACGGCATCAAGGACCAGAGCGCAAGGTGC  
TGCACCTGGCGACCACCGTGGCGCGCATGCCGCGCAAGGACTTCATCCGTTCTGTGGGAAGGCA  
ACCAGACCAACCTGGAATGGGTGGAAGACGCACTCAAGCGCAAGCAGAAGTGGTTCGTCGGCG  
CTGCGCGACGTCAAGGACCAGATCGTCTCCGAGCAGCAGGGCTCGATCGAGATGGAAAAGGCC  
AACTACCTGACCCTGGGCGAGATCAAGGAGATCAGCCGTGCGATGGCCTATGGC

>XCNJ

ATGCGCGAAATGGGCACGGTTCGAGCTGCTGACCCGCGAAGGCGAAATCGCCATCGCCAAGCGT  
ATCGAAGAGGGCCTGAGCCAGGTCCAGGCCGCACTGGGTACGTTCCCGCTGTGACCGAGCTG  
CTGCTGTCCGATTACGAAGCGCACAAGGAAGGCAAGAAGCGCCTGGCCGAGATCGTGGTTCGGC  
TTCAACGACCTGATCGAAGAAGCCGACGCTGCCGCTGCAGCGCTGGCCGCTGCCGCCCCGGTC  
GCCGTTGACGAAGATGCGGTGGACGAAGACGACGAGCAGAAAGACGGCGATGACGACGCTGCCGA  
GGAAGAAGCCGGCCCCGACCGGTCCGGACCCGGTGGAAAGTTGCCACGCGCATGGAGAACCTGG  
CCAACGAGTACGCCAAGTTCAAGAAGGCCTACGTCAAGTATGGCGCCGAGCACAAGAATGTGG  
CCAAGGCGCGGAAGACATGGCCGCCATCTTACCACACTCAAGCTGCCGCTGCCGCTGACCG  
ATGCGCTGGTACCCAGTTGCGTGGCGTGGTCAACGGCATCAAGGACCAGAGCGCAAGGTGC  
TGCACCTGGCGACCACCGTGGCGCGCATGCCGCGCAAGGACTTCATCCGTTCTGTGGGAAGGCA  
ACCAGACCAACCTGGAATGGGTGGAAGACGCACTCAAGCGCAAGCAGAAGTGGTTCGTCGGCG  
CTGCGCGACGTCAAGGACCAGATCGTCTCCGAGCAGCAGGGTTCGATCGAGATGGAAAAGGCG  
AACTACCTCACCTGGCCGAGATCAAGGACATCAGCCGTGCGATGGCCTACGGC

>XCWL

ATGCGCGAAATGGGCACGGTTGAGCTGCTGACCCGCGAAGGCGAAATCGCCATCGCCAAGCGC  
ATCGAAGAAGGTCTGAGCCAGGTCCAGGCAGCACTGGGCGTGTCCCGCTGTGACCGAAATG  
CTGCTGGCCGATTACGAAGCGCACAAGGAAGGCAAGAAGCGTCTGGCCGAGATCGTGGTTCGGC  
TTCAACGACCTGATTGAAGAAGCCGACGCTGCCGCCGCTGCACTGGCCGCTGCCGCCCCGGTCG  
CCGTGGACGAAGACGCGGTTCGATGAAGATGACGACGAAGACGGCGACGACGCTGCCGAG  
GAAGAGGCCGGCCCCGACCGGTCCGGACCCGGTGGAAAGTGGCCACGCGCATGGAGAACCTCGC  
CAACGAATACGCCAAGTTCAAGAAGATCTACGCCAAGAACGGCGCCGAGCACAAGCTGGTGGT  
CAAGGCGCGGAAGACATGGCCGCCATCTTACCACACTCAAGCTGCCGCTGCCGCTGACCGAT  
GCGCTGGTACCCAGTTGCGTGGCGTGGTCAACGGCATCAAGGACCAGAGCGCAAGGTGCTG  
CACCTGGCGACCACCGTGGCGCGCATGCCGCGCAAGGACTTCATCCGTTCTGTGGGAAGGCAAC  
CAGACCAACCTGGAATGGGTGGAAGACGCACTCAAGCGCAAGCAGAAGTGGTTCGTCGGCGCT  
GCGCGACGTCAAGGACCAGATCGTCTCCGAGCAGCAGGGTTCGATCGAGATGGAAAAGGCGAA  
CTACCTCACCTGGCCGAGATCAAGGACATCAGCCGTGCGATGGCCTACGGC

>XCSD

ATGCGCGAAATGGGCACGGTTGAGCTGCTGACCCGCGAAGGCGAAATCGCCATCGCCAAGCGC  
ATCGAAGAAGGTCTGAGCCAGGTCCAGGCAGCACTGGGCGTGTCCCGCTGTGACCGAAATG  
CTGCTGGCCGATTACGAAGCGCACAAGGAAGGCAAGAAGCGTCTGGCCGAGATCGTGGTTCGGC  
TTCAACGACCTGATTGAAGAAGCCGACGCTGCCGCCGCTGCACTGGCCGCTGCCGCCCCGGTCG  
CCGTGGACGAAGACGCGGTTCGATGAAGATGACGACGAAGACGGCGACGACGCTGCCGAG  
GAAGAGGCCGGCCCCGACCGGTCCGGACCCGGTGGAAAGTGGCCACGCGCATGGAGAACCTCGC  
CAACGAATACGCCAAGTTCAAGAAGATCTACGCCAAGAACGGCGCCGAGCACAAGCTGGTGGT

CAAGGCGCGGAAGACATGGCCGCCATCTTACCACACTCAAGCTGCCGCTGCCGCTGACCGAT  
GCGCTGGTCACCCAGTTGCGTGGCGTGGTCAACGGCATCAAGGACCACGAGCGCAAGGTGCTG  
CACCTGGCGACCACCGTGGCGCGCATGCCGCGCAAGGACTTCATCCGTTCTGTTGGGAAGGCAAC  
CAGACCAACCTGGAATGGGTGGAAGACGCACTCAAGCGCAAGCAGAAGTGGTTCGTCGGCGCT  
GCGCGACGTCAAGGACCAGATCGTCTCCGAGCAGCAGGGTTCGATCGAGATGGAAAAGGCGAA  
CTACCTCACCTGGCCGAGATCAAGGACATCAGCCGTGCGATGGCCTACGGC

>XCJM

ATGCGCGAAATGGGCACGGTTGAGCTGCTGACCCGCGAAGGCGAAATCGCCATCGCCAAGCGC  
ATCGAAGAAGGTCTGAGCCAGGTCCAGGCAGCACTGGGCGTGTCCCGCTGTCGACCGAAATG  
CTGCTGGCCGATTACGAAGCGCACAAGGAAGGCAAGAAGCGTCTGGCCGAGATCGTGGTTCGGC  
TTCAACGACCTGATTGAAGAAGCCGACGCTGCCGCCGCTGCACTGGCCGCTGCCGGCCGGTTCG  
CCGTGGACGAAGACGCGGTCGATGAAGATGACGACGAAGACGCGGACGACGACGCTGCCGAG  
GAAGAGGCCGGCCGACCGGTCCGGACCCGGTGGAAAGTGGCCACGCGCATGGAGAACCTCGC  
CAACGAATACGCCAAGTTCAAGAAGATCTACGCCAAGAACGGCGCCGAGCACAAGCTGGTGGT  
CAAGGCGCGGAAGACATGGCCGCCATCTTACCACACTCAAGCTGCCGCTGCCGCTGACCGAT  
GCGCTGGTCACCCAGTTGCGTGGCGTGGTCAACGGCATCAAGGACCACGAGCGCAAGGTGCTG  
CACCTGGCGACCACCGTGGCGCGCATGCCGCGCAAGGACTTCATCCGTTCTGTTGGGAAGGCAAC  
CAGACCAACCTGGAATGGGTGGAAGACGCACTCAAGCGCAAGCAGAAGTGGTTCGTCGGCGCT  
GCGCGACGTCAAGGACCAGATCGTCTCCGAGCAGCAGGGTTCGATCGAGATGGAAAAGGCGAA  
CTACCTCACCTGGCCGAGATCAAGGACATCAGCCGTGCGATGGCCTACGGC

>XCYL

ATGCGCGAAATGGGCACGGTTGAGCTGCTGACCCGCGAAGGCGAAATCGCCATCGCCAAGCGC  
ATCGAAGAAGGTCTGAGCCAGGTCCAGGCAGCACTGGGCGTGTCCCGCTGTCGACCGAAATG  
CTGCTGGCCGATTACGAAGCGCACAAGGAAGGCAAGAAGCGTCTGGCCGAGATCGTGGTTCGGC  
TTCAACGACCTGATTGAAGAAGCCGACGCTGCCGCCGCTGCACTGGCCGCTGCCGGCCGGTTCG  
CCGTGGACGAAGACGCGGTCGATGAAGATGACGACGAAGACGCGGACGACGACGCTGCCGAG  
GAAGAGGCCGGCCGACCGGTCCGGACCCGGTGGAAAGTGGCCACGCGCATGGAGAACCTCGC  
CAACGAATACGCCAAGTTCAAGAAGATCTACGCCAAGAACGGCGCCGAGCACAAGCTGGTGGT  
CAAGGCGCGGAAGACATGGCCGCCATCTTACCACACTCAAGCTGCCGCTGCCGCTGACCGAT  
GCGCTGGTCACCCAGTTGCGTGGCGTGGTCAACGGCATCAAGGACCACGAGCGCAAGGTGCTG  
CACCTGGCGACCACCGTGGCGCGCATGCCGCGCAAGGACTTCATCCGTTCTGTTGGGAAGGCAAC  
CAGACCAACCTGGAATGGGTGGAAGACGCACTCAAGCGCAAGCAGAAGTGGTTCGTCGGCGCT  
GCGCGACGTCAAGGACCAGATCGTCTCCGAGCAGCAGGGTTCGATCGAGATGGAAAAGGCGAA  
CTACCTCACCTGGCCGAGATCAAGGACATCAGCCGTGCGATGGCCTACGGC

>XCBS

ATGCGCGAAATGGGCACGGTTGAGCTGCTGACCCGCGAAGGCGAAATCGCCATCGCCAAGCGC  
ATCGAAGAAGGTCTGAGCCAGGTCCAGGCAGCACTGGGCGTGTCCCGCTGTCGACCGAAATG  
CTGCTGGCCGATTACGAAGCGCACAAGGAAGGCAAGAAGCGTCTGGCCGAGATCGTGGTTCGGC  
TTCAACGACCTGATTGAAGAAGCCGACGCTGCCGCCGCTGCACTGGCCGCTGCCGGCCGGTTCG  
CCGTGGACGAAGACGCGGTCGATGAAGATGACGACGAAGACGCGGACGACGACGCTGCCGAG  
GAAGAGGCCGGCCGACCGGTCCGGACCCGGTGGAAAGTGGCCACGCGCATGGAGAACCTCGC  
CAACGAATACGCCAAGTTCAAGAAGATCTACGCCAAGAACGGCGCCGAGCACAAGCTGGTGGT  
CAAGGCGCGGAAGACATGGCCGCCATCTTACCACACTCAAGCTGCCGCTGCCGCTGACCGAT  
GCGCTGGTCACCCAGTTGCGTGGCGTGGTCAACGGCATCAAGGACCACGAGCGCAAGGTGCTG



CACCTGGCGACCACCGTGGCGCGCATGCCGCGCAAGGACTTCATCCGTTCTGTGGGAAGGCAAC  
CAGACCAACCTGGAATGGGTGGAAGACGCACTCAAGCGCAAGCAGAAGTGGTCGTCCGGCGCT  
GCGCGACGTCAAGGACCAGATCGTCTCCGAGCAGCAGGGTTCGATCGAGATGGAAAAGGCGAA  
CTACCTCACCTGGCCGAGATCAAGGACATCAGCCGTGCGATGGCCTACGGC

>XCJN

ATGCGCGAAATGGGCACGGTTGAGCTGCTGACCCGCGAAGGCGAAATCGCCATCGCCAAGCGC  
ATCGAAGAAGGTCTGAGCCAGGTCCAGGCAGCACTGGGCGTGTCCCGCTGTCCGACCGAAATG  
CTGCTGGCCGATTACGAAGCGCACAAGGAAGGCAAGAAGCGTCTGGCCGAGATCGTGGTCCGC  
TTCAACGACCTGATTGAAGAAGCCGACGCTGCCGCCGCTGCACTGGCCGCTGCCGGCCCGGTCCG  
CCGTGGACGAAGACGCGGTTCGATGAAGATGACGACGAAGACGGCGACGACGACGCTGCCGAG  
GAAGAGGCCGGCCCGACCGGTCCGGACCCGGTGGAAAGTGGCCACGCGCATGGAGAACCTCGC  
CAACGAATACGCCAAGTTCAAGAAGATCTACGCCAAGAACGGCGCCGAGCACAAGCTGGTGGT  
CAAGGCGCGCGAAGACATGGCCGCCATCTTACCACACTCAAGCTGCCGCTGCCGCTGACCGAT  
GCGCTGGTCAACCAAGTTGCGTGGCGTGGTCAACGGCATCAAGGACCAGAGCGCAAGGTGCTG  
CACCTGGCGACCACCGTGGCGCGCATGCCGCGCAAGGACTTCATCCGTTCTGTGGGAAGGCAAC  
CAGACCAACCTGGAATGGGTGGAAGACGCACTCAAGCGCAAGCAGAAGTGGTCGTCCGGCGCT  
GCGCGACGTCAAGGACCAGATCGTCTCCGAGCAGCAGGGTTCGATCGAGATGGAAAAGGCGAA  
CTACCTCACCTGGCCGAGATCAAGGACATCAGCCGTGCGATGGCCTACGGC

>XCCW

ATGCGCGAAATGGGCACGGTTGAGCTGCTGACCCGCGAAGGCGAAATCGCCATCGCCAAGCGC  
ATCGAAGAAGGTCTGAGCCAGGTCCAGGCAGCACTGGGCGTGTCCCGCTGTCCGACCGAAATG  
CTGCTGGCCGATTACGAAGCGCACAAGGAAGGCAAGAAGCGTCTGGCCGAGATCGTGGTCCGC  
TTCAACGACCTGATTGAAGAAGCCGACGCTGCCGCCGCTGCACTGGCCGCTGCCGGCCCGGTCCG  
CCGTGGACGAAGACGCGGTTCGATGAAGATGACGACGAAGACGGCGACGACGACGCTGCCGAG  
GAAGAGGCCGGCCCGACCGGTCCGGACCCGGTGGAAAGTGGCCACGCGCATGGAGAACCTCGC  
CAACGAATACGCCAAGTTCAAGAAGATCTACGCCAAGAACGGCGCCGAGCACAAGCTGGTGGT  
CAAGGCGCGCGAAGACATGGCCGCCATCTTACCACACTCAAGCTGCCGCTGCCGCTGACCGAT  
GCGCTGGTCAACCAAGTTGCGTGGCGTGGTCAACGGCATCAAGGACCAGAGCGCAAGGTGCTG  
CACCTGGCGACCACCGTGGCGCGCATGCCGCGCAAGGACTTCATCCGTTCTGTGGGAAGGCAAC  
CAGACCAACCTGGAATGGGTGGAAGACGCACTCAAGCGCAAGCAGAAGTGGTCGTCCGGCGCT  
GCGCGACGTCAAGGACCAGATCGTCTCCGAGCAGCAGGGTTCGATCGAGATGGAAAAGGCGAA  
CTACCTCACCTGGCCGAGATCAAGGACATCAGCCGTGCGATGGCCTACGGC

>XCWH1

ATGCGCGAAATGGGCACGGTTGAGCTGCTGACCCGCGAAGGCGAAATCGCCATCGCCAAGCGC  
ATCGAAGAAGGTCTGAGCCAGGTCCAGGCAGCACTGGGCGTGTCCCGCTGTCCGACCGAAATG  
CTGCTGGCCGATTACGAAGCGCACAAGGAAGGCAAGAAGCGTCTGGCCGAGATCGTGGTCCGC  
TTCAACGACCTGATTGAAGAAGCCGACGCTGCCGCCGCTGCACTGGCCGCTGCCGGCCCGGTCCG  
CCGTGGACGAAGACGCGGTTCGATGAAGATGACGACGAAGACGGCGACGACGACGCTGCCGAG  
GAAGAGGCCGGCCCGACCGGTCCGGACCCGGTGGAAAGTGGCCACGCGCATGGAGAACCTCGC  
CAACGAATACGCCAAGTTCAAGAAGATCTACGCCAAGAACGGCGCCGAGCACAAGCTGGTGGT  
CAAGGCGCGCGAAGACATGGCCGCCATCTTACCACACTCAAGCTGCCGCTGCCGCTGACCGAT  
GCGCTGGTCAACCAAGTTGCGTGGCGTGGTCAACGGCATCAAGGACCAGAGCGCAAGGTGCTG  
CACCTGGCGACCACCGTGGCGCGCATGCCGCGCAAGGACTTCATCCGTTCTGTGGGAAGGCAAC  
CAGACCAACCTGGAATGGGTGGAAGACGCACTCAAGCGCAAGCAGAAGTGGTCGTCCGGCGCT

GCGCGACGTCAAGGACCAGATCGTCTCCGAGCAGCAGGGTTCGATCGAGATGGAAAAGGCGAA  
CTACCTCACCTGGCCGAGATCAAGGACATCAGCCGTGCGATGGCCTACGGC

>XCWH2

ATGCGCGAAATGGGCACGGTTGAGCTGCTGACCCGCGAAGGCGAAATCGCCATCGCCAAGCGC  
ATCGAAGAAGGTCTGAGCCAGGTCCAGGCAGCACTGGGCGTGTCCCGCTGTCGACCGAAATG  
CTGCTGGCCGATTACGAAGCGCACAAGGAAGGCAAGAAGCGTCTGGCCGAGATCGTGGTTCGGC  
TTCAACGACCTGATTGAAGAAGCCGACGCTGCCGCCGCTGCACTGGCCGCTGCCGGCCCGGTTCG  
CCGTGGACGAAGACGCGGTTCGATGAAGATGACGACGAAGACGCGGACGACGACGCTGCCGAG  
GAAGAGGCCGGCCCGACCGTCCGGACCCGGTGGAAAGTGGCCACGCGCATGGAGAACCTCGC  
CAACGAATACGCCAAGTTCAAGAAGATCTACGCCAAGAACGGCGCCGAGCACAAGCTGGTGGT  
CAAGGCGCGGAAGACATGGCCGCCATCTTACCACACTCAAGCTGCCGCTGCCGCTGACCGAT  
GCGCTGGTCACCCAGTTGCGTGGCGTGGTCAACGGCATCAAGGACCACGAGCGCAAGGTGCTG  
CACCTGGCGACCACCGTGGCGCGCATGCCGCGCAAGGACTTCATCCGTTCTGTTGGAAAGGCAAC  
CAGACCAACCTGGAATGGGTGGAAGACGCACTCAAGCGCAAGCAGAAGTGGTTCGTCGGCGCT  
GCGCGACGTCAAGGACCAGATCGTCTCCGAGCAGCAGGGTTCGATCGAGATGGAAAAGGCGAA  
CTACCTCACCTGGCCGAGATCAAGGACATCAGCCGTGCGATGGCCTACGGC

>XCDX1

ATGCGCGAAATGGGCACGGTTGAGCTGCTGACCCGCGAAGGCGAAATCGCCATCGCCAAGCGC  
ATCGAAGAAGGTCTGAGCCAGGTCCAGGCAGCACTGGGCGTGTCCCGCTGTCGACCGAAATG  
CTGCTGGCCGATTACGAAGCGCACAAGGAAGGCAAGAAGCGTCTGGCCGAGATCGTGGTTCGGC  
TTCAACGACCTGATTGAAGAAGCCGACGCTGCCGCCGCTGCACTGGCCGCTGCCGGCCCGGTTCG  
CCGTGGACGAAGACGCGGTTCGATGAAGATGACGACGAAGACGCGGACGACGACGCTGCCGAG  
GAAGAGGCCGGCCCGACCGTCCGGACCCGGTGGAAAGTGGCCACGCGCATGGAGAACCTCGC  
CAACGAATACGCCAAGTTCAAGAAGATCTACGCCAAGAACGGCGCCGAGCACAAGCTGGTGGT  
CAAGGCGCGGAAGACATGGCCGCCATCTTACCACACTCAAGCTGCCGCTGCCGCTGACCGAT  
GCGCTGGTCACCCAGTTGCGTGGCGTGGTCAACGGCATCAAGGACCACGAGCGCAAGGTGCTG  
CACCTGGCGACCACCGTGGCGCGCATGCCGCGCAAGGACTTCATCCGTTCTGTTGGAAAGGCAAC  
CAGACCAACCTGGAATGGGTGGAAGACGCACTCAAGCGCAAGCAGAAGTGGTTCGTCGGCGCT  
GCGCGACGTCAAGGACCAGATCGTCTCCGAGCAGCAGGGTTCGATCGAGATGGAAAAGGCGAA  
CTACCTCACCTGGCCGAGATCAAGGACATCAGCCGTGCGATGGCCTACGGC

>XCDX2

ATGCGCGAAATGGGCACGGTTGAGCTGCTGACCCGCGAAGGCGAAATCGCCATCGCCAAGCGC  
ATCGAAGAAGGTCTGAGCCAGGTCCAGGCAGCACTGGGCGTGTCCCGCTGTCGACCGAAATG  
CTGCTGGCCGATTACGAAGCGCACAAGGAAGGCAAGAAGCGTCTGGCCGAGATCGTGGTTCGGC  
TTCAACGACCTGATTGAAGAAGCCGACGCTGCCGCCGCTGCACTGGCCGCTGCCGGCCCGGTTCG  
CCGTGGACGAAGACGCGGTTCGATGAAGATGACGACGAAGACGCGGACGACGACGCTGCCGAG  
GAAGAGGCCGGCCCGACCGTCCGGACCCGGTGGAAAGTGGCCACGCGCATGGAGAACCTCGC  
CAACGAATACGCCAAGTTCAAGAAGATCTACGCCAAGAACGGCGCCGAGCACAAGCTGGTGGT  
CAAGGCGCGGAAGACATGGCCGCCATCTTACCACACTCAAGCTGCCGCTGCCGCTGACCGAT  
GCGCTGGTCACCCAGTTGCGTGGCGTGGTCAACGGCATCAAGGACCACGAGCGCAAGGTGCTG  
CACCTGGCGACCACCGTGGCGCGCATGCCGCGCAAGGACTTCATCCGTTCTGTTGGAAAGGCAAC  
CAGACCAACCTGGAATGGGTGGAAGACGCACTCAAGCGCAAGCAGAAGTGGTTCGTCGGCGCT  
GCGCGACGTCAAGGACCAGATCGTCTCCGAGCAGCAGGGTTCGATCGAGATGGAAAAGGCGAA  
CTACCTCACCTGGCCGAGATCAAGGACATCAGCCGTGCGATGGCCTACGGC

>XCDX3

ATGCGCGAAATGGGCACGGTTGAGCTGCTGACCCGCGAAGGCGAAATCGCCATCGCCAAGCGC  
ATCGAAGAAGGTCTGAGCCAGGTCCAGGCAGCACTGGGCGTGTTCGCGTGTGCGACCGAAATG  
CTGCTGGCCGATTACGAAGCGCACAAGGAAGGCAAGAAGCGTCTGGCCGAGATCGTGGTTCGGC  
TTCAACGACCTGATTGAAGAAGCCGACGCTGCCGCCGCTGCACTGGCCGCTGCCGGCCCCGGTCCG  
CCGTGGACGAAGACGCGGTTCGATGAAGATGACGACGAAGACGCGGACGACGACGCTGCCGAG  
GAAGAGGCCGGCCCCGACCGGTCCGGACCCGGTGGAAAGTGGCCACGCGCATGGAGAACCTCGC  
CAACGAATACGCCAAGTTCAAGAAGATCTACGCCAAGAACGGCGCCGAGCACAAGCTGGTGGT  
CAAGGCGCGGAAGACATGGCCGCCATCTTACCACACTCAAGCTGCCGCTGCCGCTGACCGAT  
GCGCTGGTCAACCGAGTTGCGTGGCGTGGTCAACGGCATCAAGGACCACGAGCGCAAGGTGCTG  
CACCTGGCGACCACCGTGGCGCGCATGCCGCGCAAGGACTTCATCCGTTCTGTGGGAAGGCAAC  
CAGACCAACCTGGAATGGGTGGAAGACGCACTCAAGCGCAAGCAGAAGTGGTTCGTCGGCGCT  
GCGCGACGTCAAGGACCAGATCGTCTCCGAGCAGCAGGGTTCGATCGAGATGGAAAAGGCGAA  
CTACCTCACCTGGCCGAGATCAAGGACATCAGCCGTGCGATGGCCTACGGC

>XCTG

ATGCGCGAAATGGGCACGGTTCGAGCTGCTGACCCGCGAAGGCGAAATCGCCATCGCCAAGCGT  
ATCGAAGAGGGCCTGAGCCAGGTCCAGGCCGCACTGGGTACGTTCGCGTGTGCGACCGAGCTG  
CTGCTGTCCGATTACGAAGCGCACAAGGAAGGCAAGAAGCGCCTGGCCGAGATCGTGGTTCGGC  
TTCAACGACCTGATCGAAGAAGCCGACGCTGCCGCTGCAGCGCTGGCCGCTGCCGGCCCCGGTCC  
GCCGTTGACGAAGATGCGGTGGACGAAGACGCGAGACGAAGACGCGCATGACGACGCTGCCGA  
GGAAGAAGCCGGCCCCGACCGGTCCGGACCCGGTGGAAAGTTGCCACGCGCATGGAGAACCTGG  
CCAACGAGTACGCCAAGTTCAAGAAGGCCTACGTCAAGTATGGCGCCGAGCACAAGAATGTGG  
CCAAGGCGCGGAAGACATGGCCGCCATCTTACCACACTCAAGCTGCCGCTGCCGCTGACCG  
ATGCGCTGGTCAACCGAGTTGCGTGGCGTGGTCAACGGCATCAAGGACCACGAGCGCAAGGTGC  
TGCACCTGGCGACCACCGTGGCGCGCATGCCGCGCAAGGACTTCATCCGTTCTGTGGGAAGGCA  
ACCAGACCAACCTGGAATGGGTGGAAGACGCACTCAAGCGCAAGCAGAAGTGGTTCGTCGGCG  
CTGCGGACGTCAAGGACCAGATCGTCTCCGAGCAGCAGGGTTCGATCGAGATGGAAAAGGCC  
AACTACCTGACCCTGGGCGAGATCAAGGAGATCAGCCGTGCGATGGCCTATGGC

>XCAW1

ATGCGCGAAATGGGCACGGTTGAGCTGCTGACCCGCGAAGGCGAAATCGCCATCGCCAAGCGC  
ATCGAAGAAGGTCTGAGCCAGGTCCAGGCAGCACTGGGCGTGTTCGCGTGTGCGACCGAAATG  
CTGCTGGCCGATTACGAAGCGCACAAGGAAGGCAAGAAGCGTCTGGCCGAGATCGTGGTTCGGC  
TTCAACGACCTGATTGAAGAAGCCGACGCTGCCGCCGCTGCACTGGCCGCTGCCGGCCCCGGTCCG  
CCGTGGACGAAGACGCGGTTCGATGAAGATGACGACGAAGACGCGGACGACGACGCTGCCGAG  
GAAGAGGCCGGCCCCGACCGGTCCGGACCCGGTGGAAAGTGGCCACGCGCATGGAGAACCTCGC  
CAACGAATACGCCAAGTTCAAGAAGATCTACGCCAAGAACGGCGCCGAGCACAAGCTGGTGGT  
CAAGGCGCGGAAGACATGGCCGCCATCTTACCACACTCAAGCTGCCGCTGCCGCTGACCGAT  
GCGCTGGTCAACCGAGTTGCGTGGCGTGGTCAACGGCATCAAGGACCACGAGCGCAAGGTGCTG  
CACCTGGCGACCACCGTGGCGCGCATGCCGCGCAAGGACTTCATCCGTTCTGTGGGAAGGCAAC  
CAGACCAACCTGGAATGGGTGGAAGACGCACTCAAGCGCAAGCAGAAGTGGTTCGTCGGCGCT  
GCGCGACGTCAAGGACCAGATCGTCTCCGAGCAGCAGGGTTCGATCGAGATGGAAAAGGCGAA  
CTACCTCACCTGGCCGAGATCAAGGACATCAGCCGTGCGATGGCCTACGGC

>XCYQ1

ATGCGCGAAATGGGCACGGTTGAGCTGCTGACCCGCGAAGGCGAAATCGCCATCGCCAAGCGC

ATCGAAGAAGGTCTGAGCCAGGTCCAGGCAGCACTGGGCGTGTTCGCGTGTTCGACCGAAATG  
CTGCTGGCCGATTACGAAGCGCACAAGGAAGGCAAGAAGCGTCTGGCCGAGATCGTGGTCCGGC  
TTCAACGACCTGATTGAAGAAGCCGACGCTGCCGCCGCTGCACTGGCCGCTGCCGGCCCGGTTCG  
CCGTGGACGAAGACGCGGTTCGATGAAGATGACGACGAAGACGGCGACGACGACGCTGCCGAG  
GAAGAGGCCGGCCCGACCGGTCCGGACCCGGTGGAAAGTGGCCACGCGCATGGAGAACCTCGC  
CAACGAATACGCCAAGTTCAAGAAGATCTACGCCAAGAACGGCGCCGAGCACAAGCTGGTGGT  
CAAGGCGCGGAAGACATGGCCGCCATCTTACCACACTCAAGCTGCCGCTGCCGCTGACCGAT  
GCGCTGGTACCCAGTTGCGTGGCGTGGTCAACGGCATCAAGGACCACGAGCGCAAGGTGCTG  
CACCTGGCGACCACCGTGGCGCGCATGCCGCGCAAGGACTTCATCCGTTTCGTGGGAAGGCAAC  
CAGACCAACCTGGAATGGGTGGAAGACGCACTCAAGCGCAAGCAGAAGTGGTTCGTCCGGCGCT  
GCGCGACGTCAAGGACCAGATCGTCTCCGAGCAGCAGGGTTCGATCGAGATGGAAAAGGCGAA  
CTACCTCACCTGGCCGAGATCAAGGACATCAGCCGTGCGATGGCCTACGGC

>XCYQ2

ATGCGCGAAATGGGCACGGTTGAGCTGCTGACCCGCGAAGGCGAAATCGCCATCGCCAAGCGC  
ATCGAAGAAGGTCTGAGCCAGGTCCAGGCAGCACTGGGCGTGTTCGCGTGTTCGACCGAAATG  
CTGCTGGCCGATTACGAAGCGCACAAGGAAGGCAAGAAGCGTCTGGCCGAGATCGTGGTCCGGC  
TTCAACGACCTGATTGAAGAAGCCGACGCTGCCGCCGCTGCACTGGCCGCTGCCGGCCCGGTTCG  
CCGTGGACGAAGACGCGGTTCGATGAAGATGACGACGAAGACGGCGACGACGACGCTGCCGAG  
GAAGAGGCCGGCCCGACCGGTCCGGACCCGGTGGAAAGTGGCCACGCGCATGGAGAACCTCGC  
CAACGAATACGCCAAGTTCAAGAAGATCTACGCCAAGAACGGCGCCGAGCACAAGCTGGTGGT  
CAAGGCGCGGAAGACATGGCCGCCATCTTACCACACTCAAGCTGCCGCTGCCGCTGACCGAT  
GCGCTGGTACCCAGTTGCGTGGCGTGGTCAACGGCATCAAGGACCACGAGCGCAAGGTGCTG  
CACCTGGCGACCACCGTGGCGCGCATGCCGCGCAAGGACTTCATCCGTTTCGTGGGAAGGCAAC  
CAGACCAACCTGGAATGGGTGGAAGACGCACTCAAGCGCAAGCAGAAGTGGTTCGTCCGGCGCT  
GCGCGACGTCAAGGACCAGATCGTCTCCGAGCAGCAGGGTTCGATCGAGATGGAAAAGGCGAA  
CTACCTCACCTGGCCGAGATCAAGGACATCAGCCGTGCGATGGCCTACGGC

>XCYQ3

ATGCGCGAAATGGGCACGGTTGAGCTGCTGACCCGCGAAGGCGAAATCGCCATCGCCAAGCGC  
ATCGAAGAAGGTCTGAGCCAGGTCCAGGCAGCACTGGGCGTGTTCGCGTGTTCGACCGAAATG  
CTGCTGGCCGATTACGAAGCGCACAAGGAAGGCAAGAAGCGTCTGGCCGAGATCGTGGTCCGGC  
TTCAACGACCTGATTGAAGAAGCCGACGCTGCCGCCGCTGCACTGGCCGCTGCCGGCCCGGTTCG  
CCGTGGACGAAGACGCGGTTCGATGAAGATGACGACGAAGACGGCGACGACGACGCTGCCGAG  
GAAGAGGCCGGCCCGACCGGTCCGGACCCGGTGGAAAGTGGCCACGCGCATGGAGAACCTCGC  
CAACGAATACGCCAAGTTCAAGAAGATCTACGCCAAGAACGGCGCCGAGCACAAGCTGGTGGT  
CAAGGCGCGGAAGACATGGCCGCCATCTTACCACACTCAAGCTGCCGCTGCCGCTGACCGAT  
GCGCTGGTACCCAGTTGCGTGGCGTGGTCAACGGCATCAAGGACCACGAGCGCAAGGTGCTG  
CACCTGGCGACCACCGTGGCGCGCATGCCGCGCAAGGACTTCATCCGTTTCGTGGGAAGGCAAC  
CAGACCAACCTGGAATGGGTGGAAGACGCACTCAAGCGCAAGCAGAAGTGGTTCGTCCGGCGCT  
GCGCGACGTCAAGGACCAGATCGTCTCCGAGCAGCAGGGTTCGATCGAGATGGAAAAGGCGAA  
CTACCTCACCTGGCCGAGATCAAGGACATCAGCCGTGCGATGGCCTACGGC

>XCGY1

ATGCGCGAAATGGGCACGGTTGAGCTGCTGACCCGCGAAGGCGAAATCGCCATCGCCAAGCGC  
ATCGAAGAAGGTCTGAGCCAGGTCCAGGCAGCACTGGGCGTGTTCGCGTGTTCGACCGAAATG  
CTGCTGGCCGATTACGAAGCGCACAAGGAAGGCAAGAAGCGTCTGGCCGAGATCGTGGTCCGGC

TTCAACGACCTGATTGAAGAAGCCGACGCTGCCGCCGCTGCACTGGCCGCTGCCGGCCCGGTTCG  
CCGTGGACGAAGACGCGGTTCGATGAAGATGACGACGAAGACGCGGACGACGACGCTGCCGAG  
GAAGAGGCCGGCCCGACCGGTCCGGACCCGGTGGAAAGTGGCCACGCGCATGGAGAACCTCGC  
CAACGAATACGCCAAGTTCAAGAAGATCTACGCCAAGAACGGCGCCGAGCACAAGCTGGTGTT  
CAAGGCGCGGAAGACATGGCCGCCATCTTACCACACTCAAGCTGCCGCTGCCGCTGACCGAT  
GCGCTGGTACCCAGTTGCGTGGCGTGGTCAACGGCATCAAGGACCACGAGCGCAAGGTGCTG  
CACCTGGCGACCACCGTGGCGCGCATGCCGCGCAAGGACTTCATCCGTTCTGTGGGAAGGCAAC  
CAGACCAACCTGGAATGGGTGGAAGACGCACTCAAGCGCAAGCAGAAGTGGTCTGTCGGCGCT  
GCGCGACGTCAAGGACCAGATCGTCTCCGAGCAGCAGGGTTCGATCGAGATGGAAAAGGCGAA  
CTACCTCACCTGGCCGAGATCAAGGACATCAGCCGTGCGATGGCCTACGGC

>XCGY2

ATGCGCGAAATGGGCACGGTTGAGCTGCTGACCCGCGAAGGCGAAATCGCCATCGCCAAGCGC  
ATCGAAGAAGGTCTGAGCCAGGTCCAGGCAGCACTGGGCGTGTTCGCGCTGTCGACCGAAATG  
CTGCTGGCCGATTACGAAGCGCACAAGGAAGGCAAGAAGCGTCTGGCCGAGATCGTGGTTCGGC  
TTCAACGACCTGATTGAAGAAGCCGACGCTGCCGCCGCTGCACTGGCCGCTGCCGGCCCGGTTCG  
CCGTGGACGAAGACGCGGTTCGATGAAGATGACGACGAAGACGCGGACGACGACGCTGCCGAG  
GAAGAGGCCGGCCCGACCGGTCCGGACCCGGTGGAAAGTGGCCACGCGCATGGAGAACCTCGC  
CAACGAATACGCCAAGTTCAAGAAGATCTACGCCAAGAACGGCGCCGAGCACAAGCTGGTGTT  
CAAGGCGCGGAAGACATGGCCGCCATCTTACCACACTCAAGCTGCCGCTGCCGCTGACCGAT  
GCGCTGGTACCCAGTTGCGTGGCGTGGTCAACGGCATCAAGGACCACGAGCGCAAGGTGCTG  
CACCTGGCGACCACCGTGGCGCGCATGCCGCGCAAGGACTTCATCCGTTCTGTGGGAAGGCAAC  
CAGACCAACCTGGAATGGGTGGAAGACGCACTCAAGCGCAAGCAGAAGTGGTCTGTCGGCGCT  
GCGCGACGTCAAGGACCAGATCGTCTCCGAGCAGCAGGGTTCGATCGAGATGGAAAAGGCGAA  
CTACCTCACCTGGCCGAGATCAAGGACATCAGCCGTGCGATGGCCTACGGC

>XCGY3

ATGCGCGAAATGGGCACGGTTCGAGCTGCTGACCCGCGAAGGCGAAATCGCCATCGCCAAGCGT  
ATCGAAGAGGGCCTGAGCCAGGTCCAGGCCGCACTGGGTACGTTCGCGCTGTCGACCGAGCTG  
CTGCTGTCCGATTACGAAGCGCACAAGGAAGGCAAGAAGCGCCTGGCCGAGATCGTGGTTCGGC  
TTCAACGACCTGATCGAAGAAGCCGACGCTGCCGCCGCTGCAGCGCTGGCCGCTGCCGGCCCGGTTC  
GCCGTTGACGAAGATGCGGTGGACGAAGACGCGAGACGAAGACGGCGATGACGACGCTGCCGA  
GGAAGAAGCCGGCCCGACCGGTCCGGACCCGGTGGAAAGTTGCCACGCGCATGGAGAACCTGG  
CCAACGAGTACGCCAAGTTCAAGAAGGCCTACGTCAAGTATGGCGCCGAGCACAAGAATGTGG  
CCAAGGCGCGGAAGACATGGCCGCCATCTTACCACACTCAAGCTGCCGCTGCCGCTGACCG  
ATGCGCTGGTACCCAGTTGCGTGGCGTGGTCAACGGCATCAAGGACCACGAGCGCAAGGTGC  
TGCACCTGGCGACCACCGTGGCGCGCATGCCGCGCAAGGACTTCATCCGTTCTGTGGGAAGGCA  
ACCAGACCAACCTGGAATGGGTGGAAGACGCACTCAAGCGCAAGCAGAAGTGGTCTGTCGGCG  
CTGCGCGACGTCAAGGACCAGATCGTCTCCGAGCAGCAGGGCTCGATCGAGATGGAAAAGGCC  
AACTACCTGACCCTGGGCGAGATCAAGGAGATCAGCCGTGCGATGGCCTATGGC

>XCC1

ATGCGCGAAATGGGCACGGTTCGAGCTGCTGACCCGCGAAGGCGAAATCGCCATCGCCAAGCGT  
ATCGAAGAGGGCCTGAGCCAGGTCCAGGCCGCACTGGGTACGTTCGCGCTGTCGACCGAGCTG  
CTGCTGTCCGATTACGAAGCGCACAAGGAAGGCAAGAAGCGCCTGGCCGAGATCGTGGTTCGGC  
TTCAACGACCTGATCGAAGAAGCCGACGCTGCCGCCGCTGCAGCGCTGGCCGCTGCCGGCCCGGTTC  
GCCGTTGACGAAGATGCGGTGGACGAAGACGCGAGACGAAGACGGCGATGACGACGCTGCCGA

GGAAGAAGCCGGCCCCGACCGGTCCGGACCCGGTGGAAAGTTGCCACGCGCATGGAGAACCTGG  
CCAACGAGTACGCCAAGTTCAAGAAGGCCTACGTCAAGTATGGCGCCGAGCACAAGAATGTGG  
CCAAGGCGCGGAAGACATGGCCGCCATCTTACCACACTCAAGCTGCCGCTGCCGCTGACCG  
ATGCGCTGGTACCCAGTTGCGTGGCGTGGTCAACGGCATCAAGGACCAGAGCGCAAGGTGC  
TGCACCTGGCGACCACCGTGGCGCGCATGCCGCGCAAGGACTTCATCCGTTCTGTGGGAAGGCA  
ACCAGACCAACCTGGAATGGGTGGAAGACGCACTCAAGCGCAAGCAGAAGTGGTTCGTCGGCG  
CTGCGCGACGTCAAGGACCAGATCGTCTCCGAGCAGCAGGGTTCGATCGAGATGGAAAAGGCG  
AACTACCTCACCTGGCCGAGATCAAGGACATCAGCCGTGCGATGGCCTACGGC

>XCC2

ATGCGCGAAATGGGCACGGTTGAGCTGCTGACCCGCGAAGGCGAAATCGCCATCGCCAAGCGC  
ATCGAAGAAGGTCTGAGCCAGGTCCAGGCAGCACTGGGCGTGTCCCGCTGTCGACCGAGCTG  
CTGCTGGCCGATTACGAAGCGCACAAGGAAGGCAAGAAGCGTCTGGCCGAGATCGTGGTTCGGC  
TTCAACGACCTGATTGAAGAAGCCGACGCTGCCGCCGCTGCACTGGCCGCTGCCGGCCCCGGTGC  
CCGTGGACGAAGACGCGGTTCGATGAAGATGACGACGAAGACGGCGACGACGACGCTGCCGAG  
GAAGAAGCCGGCCCCGACCGGTCCGGACCCGGTGGAAAGTTGCCACGCGCATGGAGAACCTCGCC  
AACGAATACGCCAAGTTCAAGAAGATCTACGCCAAGAACGGCGCCGAGCACAAGCTGGTGGTC  
AAGGCGCGGAAGACATGGCCGCCATCTTACCACGCTCAAGCTGCCGCTGCCGCTGACCGAT  
GCGCTGGTACCCAGTTCGCTGGCGTGGTCAACGGCATCAAGGATCAGAGCGCAAGGTACTG  
CACCTGGCCACCACCGTGGCACGCATGCCGCGCAAGGACTTCATCCGCTCCTGGGAAGGCAAC  
CAGACCAACCTGGAATGGGTGGAAGACGCACTCAAGCGCAAGCAGAAGTGGTTCGTCGGCGCT  
GCGCGACGTCAAGGACCAGATCGTCTCCGAGCAGCAGGGTTCGATCGAGATGGAAAAGGCCA  
ACTACCTGACCCTGGCGAGATCAAGGAGATCAGCCGTGCGATGGCCTATGGC

>XCZB1

ATGCGCGAAATGGGCACGGTTGAGCTGCTGACCCGCGAAGGCGAAATCGCCATCGCCAAGCGC  
ATCGAAGAAGGTCTGAGCCAGGTCCAGGCAGCACTGGGCGTGTCCCGCTGTCGACCGAAATG  
CTGCTGGCCGATTACGAAGCGCACAAGGAAGGCAAGAAGCGTCTGGCCGAGATCGTGGTTCGGC  
TTCAACGACCTGATTGAAGAAGCCGACGCTGCCGCCGCTGCACTGGCCGCTGCCGGCCCCGGTGC  
CCGTGGACGAAGACGCGGTTCGATGAAGATGACGACGAAGACGGCGACGACGACGCTGCCGAG  
GAAGAGGCCGGCCCCGACCGGTCCGGACCCGGTGGAAAGTTGGCCACGCGCATGGAGAACCTCGC  
CAACGAATACGCCAAGTTCAAGAAGATCTACGCCAAGAACGGCGCCGAGCACAAGCTGGTGGT  
CAAGGCGCGGAAGACATGGCCGCCATCTTACCACACTCAAGCTGCCGCTGCCGCTGACCGAT  
GCGCTGGTACCCAGTTGCGTGGCGTGGTCAACGGCATCAAGGACCAGAGCGCAAGGTGCTG  
CACCTGGCGACCACCGTGGCGCGCATGCCGCGCAAGGACTTCATCCGTTCTGTGGGAAGGCAAC  
CAGACCAACCTGGAATGGGTGGAAGACGCACTCAAGCGCAAGCAGAAGTGGTTCGTCGGCGCT  
GCGCGACGTCAAGGACCAGATCGTCTCCGAGCAGCAGGGTTCGATCGAGATGGAAAAGGCGAA  
CTACCTCACCTGGCCGAGATCAAGGACATCAGCCGTGCGATGGCCTACGGC

>XCZB2

ATGCGCGAAATGGGCACGGTTGAGCTGCTGACCCGCGAAGGCGAAATCGCCATCGCCAAGCGC  
ATCGAAGAAGGTCTGAGCCAGGTCCAGGCAGCACTGGGCGTGTCCCGCTGTCGACCGAAATG  
CTGCTGGCCGATTACGAAGCGCACAAGGAAGGCAAGAAGCGTCTGGCCGAGATCGTGGTTCGGC  
TTCAACGACCTGATTGAAGAAGCCGACGCTGCCGCCGCTGCACTGGCCGCTGCCGGCCCCGGTGC  
CCGTGGACGAAGACGCGGTTCGATGAAGATGACGACGAAGACGGCGACGACGACGCTGCCGAG  
GAAGAGGCCGGCCCCGACCGGTCCGGACCCGGTGGAAAGTTGGCCACGCGCATGGAGAACCTCGC  
CAACGAATACGCCAAGTTCAAGAAGATCTACGCCAAGAACGGCGCCGAGCACAAGCTGGTGGT

CAAGGCGCGGAAGACATGGCCGCCATCTTACCACACTCAAGCTGCCGCTGCCGCTGACCGAT  
GCGCTGGTCACCCAGTTGCGTGGCGTGGTCAACGGCATCAAGGACCACGAGCGCAAGGTGCTG  
CACCTGGCGACCACCGTGGCGCGCATGCCGCGCAAGGACTTCATCCGTTCTGTTGGGAAGGCAAC  
CAGACCAACCTGGAATGGGTGGAAGACGCACTCAAGCGCAAGCAGAAGTGGTTCGTCGGCGCT  
GCGCGACGTCAAGGACCAGATCGTCTCCGAGCAGCAGGGTTCGATCGAGATGGAAAAGGCGAA  
CTACCTCACCTGGCCGAGATCAAGGACATCAGCCGTGCGATGGCCTACGGC

>XCZB3

ATGCGCGAAATGGGCACGGTTGAGCTGCTGACCCGCGAAGGCGAAATCGCCATCGCCAAGCGC  
ATCGAAGAAGGTCTGAGCCAGGTCCAGGCAGCACTGGGCGTGTCCCGCTGTCGACCGAAATG  
CTGCTGGCCGATTACGAAGCGCACAAGGAAGGCAAGAAGCGTCTGGCCGAGATCGTGGTTCGGC  
TTCAACGACCTGATTGAAGAAGCCGACGCTGCCGCCGCTGCACTGGCCGCTGCCGGCCCGTTCG  
CCGTGGACGAAGACGCGGTCGATGAAGATGACGACGAAGACGCGGACGACGACGCTGCCGAG  
GAAGAGGCCGGCCCGACCGGTCCGGACCCGGTGGAAAGTGGCCACGCGCATGGAGAACCTCGC  
CAACGAATACGCCAAGTTCAAGAAGATCTACGCCAAGAACGGCGCCGAGCACAAGCTGGTGGT  
CAAGGCGCGGAAGACATGGCCGCCATCTTACCACACTCAAGCTGCCGCTGCCGCTGACCGAT  
GCGCTGGTCACCCAGTTGCGTGGCGTGGTCAACGGCATCAAGGACCACGAGCGCAAGGTGCTG  
CACCTGGCGACCACCGTGGCGCGCATGCCGCGCAAGGACTTCATCCGTTCTGTTGGGAAGGCAAC  
CAGACCAACCTGGAATGGGTGGAAGACGCACTCAAGCGCAAGCAGAAGTGGTTCGTCGGCGCT  
GCGCGACGTCAAGGACCAGATCGTCTCCGAGCAGCAGGGTTCGATCGAGATGGAAAAGGCGAA  
CTACCTCACCTGGCCGAGATCAAGGACATCAGCCGTGCGATGGCCTACGGC

>XCGZ1

ATGCGCGAAATGGGCACGGTTGAGCTGCTGACCCGCGAAGGCGAAATCGCCATCGCCAAGCGC  
ATCGAAGAAGGTCTGAGCCAGGTCCAGGCAGCACTGGGCGTGTCCCGCTGTCGACCGAAATG  
CTGCTGGCCGATTACGAAGCGCACAAGGAAGGCAAGAAGCGTCTGGCCGAGATCGTGGTTCGGC  
TTCAACGACCTGATTGAAGAAGCCGACGCTGCCGCCGCTGCACTGGCCGCTGCCGGCCCGTTCG  
CCGTGGACGAAGACGCGGTCGATGAAGATGACGACGAAGACGCGGACGACGACGCTGCCGAG  
GAAGAGGCCGGCCCGACCGGTCCGGACCCGGTGGAAAGTGGCCACGCGCATGGAGAACCTCGC  
CAACGAATACGCCAAGTTCAAGAAGATCTACGCCAAGAACGGCGCCGAGCACAAGCTGGTGGT  
CAAGGCGCGGAAGACATGGCCGCCATCTTACCACACTCAAGCTGCCGCTGCCGCTGACCGAT  
GCGCTGGTCACCCAGTTGCGTGGCGTGGTCAACGGCATCAAGGACCACGAGCGCAAGGTGCTG  
CACCTGGCGACCACCGTGGCGCGCATGCCGCGCAAGGACTTCATCCGTTCTGTTGGGAAGGCAAC  
CAGACCAACCTGGAATGGGTGGAAGACGCACTCAAGCGCAAGCAGAAGTGGTTCGTCGGCGCT  
GCGCGACGTCAAGGACCAGATCGTCTCCGAGCAGCAGGGTTCGATCGAGATGGAAAAGGCGAA  
CTACCTCACCTGGCCGAGATCAAGGACATCAGCCGTGCGATGGCCTACGGC

>XCGZ2

ATGCGCGAAATGGGCACGGTTGAGCTGCTGACCCGCGAAGGCGAAATCGCCATCGCCAAGCGC  
ATCGAAGAAGGTCTGAGCCAGGTCCAGGCAGCACTGGGCGTGTCCCGCTGTCGACCGAAATG  
CTGCTGGCCGATTACGAAGCGCACAAGGAAGGCAAGAAGCGTCTGGCCGAGATCGTGGTTCGGC  
TTCAACGACCTGATTGAAGAAGCCGACGCTGCCGCCGCTGCACTGGCCGCTGCCGGCCCGTTCG  
CCGTGGACGAAGACGCGGTCGATGAAGATGACGACGAAGACGCGGACGACGACGCTGCCGAG  
GAAGAGGCCGGCCCGACCGGTCCGGACCCGGTGGAAAGTGGCCACGCGCATGGAGAACCTCGC  
CAACGAATACGCCAAGTTCAAGAAGATCTACGCCAAGAACGGCGCCGAGCACAAGCTGGTGGT  
CAAGGCGCGGAAGACATGGCCGCCATCTTACCACACTCAAGCTGCCGCTGCCGCTGACCGAT  
GCGCTGGTCACCCAGTTGCGTGGCGTGGTCAACGGCATCAAGGACCACGAGCGCAAGGTGCTG

CACCTGGCGACCACCGTGGCGCGCATGCCGCGCAAGGACTTCATCCGTTCTGTGGGAAGGCAAC  
CAGACCAACCTGGAATGGGTGGAAGACGCACTCAAGCGCAAGCAGAAGTGGTCGTCCGGCGCT  
GCGCGACGTCAAGGACCAGATCGTCTCCGAGCAGCAGGGTTCGATCGAGATGGAAAAGGCGAA  
CTACCTCACCTGGCCGAGATCAAGGACATCAGCCGTGCGATGGCCTACGGC

>XCHN1

ATGCGCGAAATGGGCACGGTTGAGCTGCTGACCCGCGAAGGCGAAATCGCCATCGCCAAGCGC  
ATCGAAGAAGGTCTGAGCCAGGTCCAGGCAGCACTGGGCGTGTCCCGCTGTCCGACCGAAATG  
CTGCTGGCCGATTACGAAGCGCACAAGGAAGGCAAGAAGCGTCTGGCCGAGATCGTGGTCCGC  
TTCAACGACCTGATTGAAGAAGCCGACGCTGCCGCCGCTGCACTGGCCGCTGCCGGCCCGTCCG  
CCGTGGACGAAGACGCGGTTCGATGAAGATGACGACGAAGACGGCGACGACGACGCTGCCGAG  
GAAGAGGCCGGCCCGACCGGTCCGGACCCGGTGGAAAGTGGCCACGCGCATGGAGAACCTCGC  
CAACGAATACGCCAAGTTCAAGAAGATCTACGCCAAGAACGGCGCCGAGCACAAGCTGGTGGT  
CAAGGCGCGCGAAGACATGGCCGCCATCTTACCACACTCAAGCTGCCGCTGCCGCTGACCGAT  
GCGCTGGTACCCAGTTGCGTGGCGTGGTCAACGGCATCAAGGACCAGAGCGCAAGGTGCTG  
CACCTGGCGACCACCGTGGCGCGCATGCCGCGCAAGGACTTCATCCGTTCTGTGGGAAGGCAAC  
CAGACCAACCTGGAATGGGTGGAAGACGCACTCAAGCGCAAGCAGAAGTGGTCGTCCGGCGCT  
GCGCGACGTCAAGGACCAGATCGTCTCCGAGCAGCAGGGTTCGATCGAGATGGAAAAGGCGAA  
CTACCTCACCTGGCCGAGATCAAGGACATCAGCCGTGCGATGGCCTACGGC

>XCHN2

ATGCGCGAAATGGGCACGGTTGAGCTGCTGACCCGCGAAGGCGAAATCGCCATCGCCAAGCGC  
ATCGAAGAAGGTCTGAGCCAGGTCCAGGCAGCACTGGGCGTGTCCCGCTGTCCGACCGAAATG  
CTGCTGGCCGATTACGAAGCGCACAAGGAAGGCAAGAAGCGTCTGGCCGAGATCGTGGTCCGC  
TTCAACGACCTGATTGAAGAAGCCGACGCTGCCGCCGCTGCACTGGCCGCTGCCGGCCCGTCCG  
CCGTGGACGAAGACGCGGTTCGATGAAGATGACGACGAAGACGGCGACGACGACGCTGCCGAG  
GAAGAGGCCGGCCCGACCGGTCCGGACCCGGTGGAAAGTGGCCACGCGCATGGAGAACCTCGC  
CAACGAATACGCCAAGTTCAAGAAGATCTACGCCAAGAACGGCGCCGAGCACAAGCTGGTGGT  
CAAGGCGCGCGAAGACATGGCCGCCATCTTACCACACTCAAGCTGCCGCTGCCGCTGACCGAT  
GCGCTGGTACCCAGTTGCGTGGCGTGGTCAACGGCATCAAGGACCAGAGCGCAAGGTGCTG  
CACCTGGCGACCACCGTGGCGCGCATGCCGCGCAAGGACTTCATCCGTTCTGTGGGAAGGCAAC  
CAGACCAACCTGGAATGGGTGGAAGACGCACTCAAGCGCAAGCAGAAGTGGTCGTCCGGCGCT  
GCGCGACGTCAAGGACCAGATCGTCTCCGAGCAGCAGGGTTCGATCGAGATGGAAAAGGCGAA  
CTACCTCACCTGGCCGAGATCAAGGACATCAGCCGTGCGATGGCCTACGGC

>XCNM2

ATGCGCGAAATGGGCACGGTTGAGCTGCTGACCCGCGAAGGCGAAATCGCCATCGCCAAGCGC  
ATCGAAGAAGGTCTGAGCCAGGTCCAGGCAGCACTGGGCGTGTCCCGCTGTCCGACCGAAATG  
CTGCTGGCCGATTACGAAGCGCACAAGGAAGGCAAGAAGCGTCTGGCCGAGATCGTGGTCCGC  
TTCAACGACCTGATTGAAGAAGCCGACGCTGCCGCCGCTGCACTGGCCGCTGCCGGCCCGTCCG  
CCGTGGACGAAGACGCGGTTCGATGAAGATGACGACGAAGACGGCGACGACGACGCTGCCGAG  
GAAGAGGCCGGCCCGACCGGTCCGGACCCGGTGGAAAGTGGCCACGCGCATGGAGAACCTCGC  
CAACGAATACGCCAAGTTCAAGAAGATCTACGCCAAGAACGGCGCCGAGCACAAGCTGGTGGT  
CAAGGCGCGCGAAGACATGGCCGCCATCTTACCACACTCAAGCTGCCGCTGCCGCTGACCGAT  
GCGCTGGTACCCAGTTGCGTGGCGTGGTCAACGGCATCAAGGACCAGAGCGCAAGGTGCTG  
CACCTGGCGACCACCGTGGCGCGCATGCCGCGCAAGGACTTCATCCGTTCTGTGGGAAGGCAAC  
CAGACCAACCTGGAATGGGTGGAAGACGCACTCAAGCGCAAGCAGAAGTGGTCGTCCGGCGCT



GCGCGACGTCAAGGACCAGATCGTCTCCGAGCAGCAGGGTTCGATCGAGATGGAAAAGGCGAA  
CTACCTCACCTGGCCGAGATCAAGGACATCAGCCGTGCGATGGCCTACGGC

>XCXZ2

ATGCGCGAAATGGGCACGGTTGAGCTGCTGACCCGCGAAGGCGAAATCGCCATCGCCAAGCGC  
ATCGAAGAAGGTCTGAGCCAGGTCCAGGCAGCACTGGGCGTGTCCCGCTGTCGACCGAAATG  
CTGCTGGCCGATTACGAAGCGCACAAGGAAGGCAAGAAGCGTCTGGCCGAGATCGTGGTCCGGC  
TTCAACGACCTGATTGAAGAAGCCGACGCTGCCGCCGCTGCACTGGCCGCTGCCGGCCCGGTGC  
CCGTGGACGAAGACGCGGTTCGATGAAGATGACGACGAAGACGCGCAGCAGCAGCTGCCGAG  
GAAGAGGCCGGCCCGACCGTCCGGACCCGGTGGAAAGTGGCCACGCGCATGGAGAACCTCGC  
CAACGAATACGCCAAGTTCAAGAAGATCTACGCCAAGAACGGCGCCGAGCACAAGCTGGTGGT  
CAAGGCGCGCAAGACATGGCCGCCATCTTACCACACTCAAGCTGCCGCTGCCGCTGACCGAT  
GCGCTGGTACCCAGTTGCGTGGCGTGGTCAACGGCATCAAGGACCACGAGCGCAAGGTGCTG  
CACCTGGCGACCACCGTGGCGCGCATGCCGCGCAAGGACTTCATCCGTTCTGTTGGAAAGGCAAC  
CAGACCAACCTGGAATGGGTGGAAGACGCACTCAAGCGCAAGCAGAAGTGGTTCGTCGGCGCT  
GCGCGACGTCAAGGACCAGATCGTCTCCGAGCAGCAGGGTTCGATCGAGATGGAAAAGGCGAA  
CTACCTCACCTGGCCGAGATCAAGGACATCAGCCGTGCGATGGCCTACGGC

>XCJY

ATGCGCGAAATGGGCACGGTTGAGCTGCTGACCCGCGAAGGCGAAATCGCCATCGCCAAGCGC  
ATCGAAGAAGGTCTGAGCCAGGTCCAGGCAGCACTGGGCGTGTCCCGCTGTCGACCGAAATG  
CTGCTGGCCGATTACGAAGCGCACAAGGAAGGCAAGAAGCGTCTGGCCGAGATCGTGGTCCGGC  
TTCAACGACCTGATTGAAGAAGCCGACGCTGCCGCCGCTGCACTGGCCGCTGCCGGCCCGGTGC  
CCGTGGACGAAGACGCGGTTCGATGAAGATGACGACGAAGACGCGCAGCAGCAGCTGCCGAG  
GAAGAGGCCGGCCCGACCGTCCGGACCCGGTGGAAAGTGGCCACGCGCATGGAGAACCTCGC  
CAACGAATACGCCAAGTTCAAGAAGATCTACGCCAAGAACGGCGCCGAGCACAAGCTGGTGGT  
CAAGGCGCGCAAGACATGGCCGCCATCTTACCACACTCAAGCTGCCGCTGCCGCTGACCGAT  
GCGCTGGTACCCAGTTGCGTGGCGTGGTCAACGGCATCAAGGACCACGAGCGCAAGGTGCTG  
CACCTGGCGACCACCGTGGCGCGCATGCCGCGCAAGGACTTCATCCGTTCTGTTGGAAAGGCAAC  
CAGACCAACCTGGAATGGGTGGAAGACGCACTCAAGCGCAAGCAGAAGTGGTTCGTCGGCGCT  
GCGCGACGTCAAGGACCAGATCGTCTCCGAGCAGCAGGGTTCGATCGAGATGGAAAAGGCGAA  
CTACCTCACCTGGCCGAGATCAAGGACATCAGCCGTGCGATGGCCTACGGC

>XCTY

ATGCGCGAAATGGGCACGGTTGAGCTGCTGACCCGCGAAGGCGAAATCGCCATCGCCAAGCGC  
ATCGAAGAAGGTCTGAGCCAGGTCCAGGCAGCACTGGGCGTGTCCCGCTGTCGACCGAGCTG  
CTGCTGGCCGATTACGAAGCGCACAAGGAAGGCAAGAAGCGTCTGGCCGAGATCGTGGTCCGGC  
TTCAACGACCTGATTGAAGAAGCCGACGCTGCCGCCGCTGCACTGGCCGCTGCCGGCCCGGTGC  
CCGTGGACGAAGACGCGGTTCGATGAAGATGACGACGAAGACGCGCAGCAGCAGCTGCCGAG  
GAAGAAGCCGGCCCGACCGTCCGGACCCGGTGGAAAGTGGCCACGCGCATGGAGAACCTCGCC  
AACGAATACGCCAAGTTCAAGAAGATCTACGCCAAGAACGGCGCCGAGCACAAGCTGGTGGT  
AAGGCGCGCAAGACATGGCCGCCATCTTACCACGCTCAAGCTGCCGCTGCCGCTGACCGAT  
GCGCTGGTACCCAGTGGCGTGGCGTGGTCAACGGCATCAAGGATCAGGAGCGCAAGGTACTG  
CACCTGGCCACCACCGTGGCACGATGCCGCGCAAGGACTTCATCCGCTCTGGGAAGGCAAC  
CAGACCAACCTGGAATGGGTGGAAGACGCACTCAAGCGCAAGCAGAAGTGGTTCGTCGGCGCT  
GCGCGACGTCAAGGACCAGATCGTCTCCGAGCAGCAGGGTTCGATCGAGATGGAAAAGGCCA  
ACTACCTGACCCTGGCGAGATCAAGGAGATCAGCCGTGCGATGGCCTATGGC

>XCNM1

ATGCGCGAAATGGGCACGGTTGAGCTGCTGACCCGCGAAGGCGAAATCGCCATCGCCAAGCGC  
ATCGAAGAAGGTCTGAGCCAGGTCCAGGCAGCACTGGGCGTGTTCGCGTGTGCGACCGAAATG  
CTGCTGGCCGATTACGAAGCGCACAAGGAAGGCAAGAAGCGTCTGGCCGAGATCGTGGTTCGGC  
TTCAACGACCTGATTGAAGAAGCCGACGCTGCCGCCGCTGCACTGGCCGCTGCCGGCCCGGTTCG  
CCGTGGACGAAGACGCGGTTCGATGAAGATGACGACGAAGACGCGGACGACGACGCTGCCGAG  
GAAGAGGCCGGCCCGACCGGTCCGGACCCGGTGGAAAGTGGCCACGCGCATGGAGAACCTCGC  
CAACGAATACGCCAAGTTCAAGAAGATCTACGCCAAGAACGGCGCCGAGCACAAGCTGGTGGT  
CAAGGCGCGGAAGACATGGCCGCCATCTTACCACACTCAAGCTGCCGCTGCCGCTGACCGAT  
GCGCTGGTCAACCGAGTTGCGTGGCGTGGTCAACGGCATCAAGGACCACGAGCGCAAGGTGCTG  
CACCTGGCGACCACCGTGGCGCGCATGCCGCGCAAGGACTTCATCCGTTCTGTGGGAAGGCAAC  
CAGACCAACCTGGAATGGGTGGAAGACGCACTCAAGCGCAAGCAGAAGTGGTTCGTCGGCGCT  
GCGCGACGTCAAGGACCAGATCGTCTCCGAGCAGCAGGGTTCGATCGAGATGGAAAAGGCGAA  
CTACCTCACCTGGCCGAGATCAAGGACATCAGCCGTGCGATGGCCTACGGC

>XCGZ3

ATGCGCGAAATGGGCACGGTTGAGCTGCTGACCCGCGAAGGCGAAATCGCCATCGCCAAGCGC  
ATCGAAGAAGGTCTGAGCCAGGTCCAGGCAGCACTGGGCGTGTTCGCGTGTGCGACCGAAATG  
CTGCTGGCCGATTACGAAGCGCACAAGGAAGGCAAGAAGCGTCTGGCCGAGATCGTGGTTCGGC  
TTCAACGACCTGATTGAAGAAGCCGACGCTGCCGCCGCTGCACTGGCCGCTGCCGGCCCGGTTCG  
CCGTGGACGAAGACGCGGTTCGATGAAGATGACGACGAAGACGCGGACGACGACGCTGCCGAG  
GAAGAGGCCGGCCCGACCGGTCCGGACCCGGTGGAAAGTGGCCACGCGCATGGAGAACCTCGC  
CAACGAATACGCCAAGTTCAAGAAGATCTACGCCAAGAACGGCGCCGAGCACAAGCTGGTGGT  
CAAGGCGCGGAAGACATGGCCGCCATCTTACCACACTCAAGCTGCCGCTGCCGCTGACCGAT  
GCGCTGGTCAACCGAGTTGCGTGGCGTGGTCAACGGCATCAAGGACCACGAGCGCAAGGTGCTG  
CACCTGGCGACCACCGTGGCGCGCATGCCGCGCAAGGACTTCATCCGTTCTGTGGGAAGGCAAC  
CAGACCAACCTGGAATGGGTGGAAGACGCACTCAAGCGCAAGCAGAAGTGGTTCGTCGGCGCT  
GCGCGACGTCAAGGACCAGATCGTCTCCGAGCAGCAGGGTTCGATCGAGATGGAAAAGGCGAA  
CTACCTCACCTGGCCGAGATCAAGGACATCAGCCGTGCGATGGCCTACGGC

>XCC4

ATGCGCGAAATGGGCACGGTTGAGCTGCTGACCCGCGAAGGCGAAATCGCCATCGCCAAGCGC  
ATCGAAGAAGGTCTGAGCCAGGTCCAGGCAGCACTGGGCGTGTTCGCGTGTGCGACCGAGCTG  
CTGCTGGCCGATTACGAAGCGCACAAGGAAGGCAAGAAGCGTCTGGCCGAGATCGTGGTTCGGC  
TTCAACGACCTGATTGAAGAAGCCGACGCTGCCGCCGCTGCACTGGCCGCTGCCGGCCCGGTTCG  
CCGTGGACGAAGACGCGGTTCGATGAAGATGACGACGAAGACGCGGACGACGACGCTGCCGAG  
GAAGAAGCCGGCCCGACCGGTCCGGACCCGGTGGAAAGTGGCCACGCGCATGGAGAACCTCGCC  
AACGAATACGCCAAGTTCAAGAAGATCTACGCCAAGAACGGCGCCGAGCACAAGCTGGTGGT  
AAGGCGCGGAAGACATGGCCGCCATCTTACCACGCTCAAGCTGCCGCTGCCGCTGACCGAT  
GCGCTGGTCAACCGAGTTGCGTGGCGTGGTCAACGGCATCAAGGATCACGAGCGCAAGGTACTG  
CACCTGGCCACCACCGTGGCACGATGCCGCGCAAGGACTTCATCCGCTCTGTGGGAAGGCAAC  
CAGACCAACCTGGAATGGGTGGAAGACGCACTCAAGCGCAAGCAGAAGTGGTTCGTCGGCGCT  
GCGCGACGTCAAGGACCAGATCGTCTCCGAGCAGCAGGGTTCGATCGAGATGGAAAAGGCCA  
ACTACCTGACCCTGGCGGAGATCAAGGAGATCAGCCGTGCGATGGCCTATGGC

>XCXZ1

ATGCGCGAAATGGGCACGGTTGAGCTGCTGACCCGCGAAGGCGAAATCGCCATCGCCAAGCGC

ATCGAAGAAGGTCTGAGCCAGGTCCAGGCAGCACTGGGCGTGTCCCGCTGTCGACCGAAATG  
CTGCTGGCCGATTACGAAGCGCACAAGGAAGGCAAGAAGCGTCTGGCCGAGATCGTGGTCCGGC  
TTCAACGACCTGATTGAAGAAGCCGACGCTGCCGCCGCTGCACTGGCCGCTGCCGGCCCGGTTCG  
CCGTGGACGAAGACGCGGTTCGATGAAGATGACGACGAAGACGGCGACGACGACGCTGCCGAG  
GAAGAGGCCGGCCCGACCGGTCCGGACCCGGTGGAAAGTGGCCACGCGCATGGAGAACCTCGC  
CAACGAATACGCCAAGTTCAAGAAGATCTACGCCAAGAACGGCGCCGAGCACAAGCTGGTGGT  
CAAGGCGCGGAAGACATGGCCGCCATCTTACCACACTCAAGCTGCCGCTGCCGCTGACCGAT  
GCGCTGGTACCCAGTTGCGTGGCGTGGTCAACGGCATCAAGGACCACGAGCGCAAGGTGCTG  
CACCTGGCGACCACCGTGGCGCGCATGCCGCGCAAGGACTTCATCCGTTCTGTGGGAAGGCAAC  
CAGACCAACCTGGAATGGGTGGAAGACGCACTCAAGCGCAAGCAGAAGTGGTTCGTCGGCGCT  
GCGCGACGTCAAGGACCAGATCGTCTCCGAGCAGCAGGGTTCGATCGAGATGGAAAAGGCGAA  
CTACCTCACCTGGCCGAGATCAAGGACATCAGCCGTGCGATGGCCTACGGC

>XCGY4

ATGCGCGAAATGGGCACGGTTCGAGCTGCTGACCCGCGAAGGCGAAATCGCCATCGCCAAGCGT  
ATCGAAGAGGGCCTGAGCCAGGTCCAGGCCGCACTGGGTACGTTCCCGCTGTCGACCGAGCTG  
CTGCTGTCCGATTACGAAGCGCACAAGGAAGGCAAGAAGCGCCTGGCCGAGATCGTGGTCCGGC  
TTCAACGACCTGATCGAAGAAGCCGACGCTGCCGCTGCAGCGCTGGCCGCTGCCGGCCCGGTTC  
GCCGTTGACGAAGATGCGGTGGACGAAGACGACGAGCAGCAAGACGGCGATGACGACGCTGCCGA  
GGAAGAAGCCGGCCCGACCGGTCCGGACCCGGTGGAAAGTTGCCACGCGCATGGAGAACCTGG  
CCAACGAGTACGCCAAGTTCAAGAAGGCCTACGTCAAGTATGGCGCCGAGCACAAGAATGTGG  
CCAAGGCGCGGAAGACATGGCCGCCATCTTACCACACTCAAGCTGCCGCTGCCGCTGACCG  
ATGCGCTGGTACCCAGTTGCGTGGCGTGGTCAACGGCATCAAGGACCACGAGCGCAAGGTGC  
TGCACCTGGCGACCACCGTGGCGCGCATGCCGCGCAAGGACTTCATCCGTTCTGTGGGAAGGCA  
ACCAGACCAACCTGGAATGGGTGGAAGACGCACTCAAGCGCAAGCAGAAGTGGTTCGTCGGCG  
CTGCGCGACGTCAAGGACCAGATCGTCTCCGAGCAGCAGGGCTCGATCGAGATGGAAAAGGCC  
AACTACCTGACCCTGGGCGAGATCAAGGAGATCAGCCGTGCGATGGCCTATGGC

>XCAW2

ATGCGCGAAATGGGCACGGTTGAGCTGCTGACCCGCGAAGGCGAAATCGCCATCGCCAAGCGC  
ATCGAAGAAGGTCTGAGCCAGGTCCAGGCAGCACTGGGCGTGTCCCGCTGTCGACCGAAATG  
CTGCTGGCCGATTACGAAGCGCACAAGGAAGGCAAGAAGCGTCTGGCCGAGATCGTGGTCCGGC  
TTCAACGACCTGATTGAAGAAGCCGACGCTGCCGCCGCTGCACTGGCCGCTGCCGGCCCGGTTCG  
CCGTGGACGAAGACGCGGTTCGATGAAGATGACGACGAAGACGGCGACGACGACGCTGCCGAG  
GAAGAGGCCGGCCCGACCGGTCCGGACCCGGTGGAAAGTGGCCACGCGCATGGAGAACCTCGC  
CAACGAATACGCCAAGTTCAAGAAGATCTACGCCAAGAACGGCGCCGAGCACAAGCTGGTGGT  
CAAGGCGCGGAAGACATGGCCGCCATCTTACCACACTCAAGCTGCCGCTGCCGCTGACCGAT  
GCGCTGGTACCCAGTTGCGTGGCGTGGTCAACGGCATCAAGGACCACGAGCGCAAGGTGCTG  
CACCTGGCGACCACCGTGGCGCGCATGCCGCGCAAGGACTTCATCCGTTCTGTGGGAAGGCAAC  
CAGACCAACCTGGAATGGGTGGAAGACGCACTCAAGCGCAAGCAGAAGTGGTTCGTCGGCGCT  
GCGCGACGTCAAGGACCAGATCGTCTCCGAGCAGCAGGGTTCGATCGAGATGGAAAAGGCGAA  
CTACCTCACCTGGCCGAGATCAAGGACATCAGCCGTGCGATGGCCTACGGC

>XCAW3

ATGCGCGAAATGGGCACGGTTGAGCTGCTGACCCGCGAAGGCGAAATCGCCATCGCCAAGCGC  
ATCGAAGAAGGTCTGAGCCAGGTCCAGGCAGCACTGGGCGTGTCCCGCTGTCGACCGAAATG  
CTGCTGGCCGATTACGAAGCGCACAAGGAAGGCAAGAAGCGTCTGGCCGAGATCGTGGTCCGGC

TTCAACGACCTGATTGAAGAAGCCGACGCTGCCGCCGCTGCACTGGCCGCTGCCGGCCCGGTTCG  
CCGTGGACGAAGACGCGGTTCGATGAAGATGACGACGAAGACGCGGACGACGACGCTGCCGAG  
GAAGAGGCCGGCCCGACCGGTCCGGACCCGGTGGAAAGTGGCCACGCGCATGGAGAACCTCGC  
CAACGAATACGCCAAGTTCAAGAAGATCTACGCCAAGAACGGCGCCGAGCACAAGCTGGTGGT  
CAAGGCGCGGAAGACATGGCCGCCATCTTACCACACTCAAGCTGCCGCTGCCGCTGACCGAT  
GCGCTGGTACCCAGTTGCGTGGCGTGGTCAACGGCATCAAGGACCACGAGCGCAAGGTGCTG  
CACCTGGCGACCACCGTGGCGCGCATGCCGCGCAAGGACTTCATCCGTTCTGTGGGAAGGCAAC  
CAGACCAACCTGGAATGGGTGGAAGACGCACTCAAGCGCAAGCAGAAGTGGTCGTCCGGCGCT  
GCGCGACGTCAAGGACCAGATCGTCTCCGAGCAGCAGGGTTCGATCGAGATGGAAAAGGCGAA  
CTACCTCACCTGGCCGAGATCAAGGACATCAGCCGTGCGATGGCCTACGGC

>race 1

ATGCGCGAAATGGGCACGGTTGAGCTGCTGACCCGCGAAGGCGAAATCGCCATCGCCAAGCGC  
ATCGAAGAAGGTCTGAGCCAGGTCCAGGCAGCACTGGGCGTGTCCCCGCTGTCGACCGAGCTG  
CTGCTGGCCGATTACGAAGCGCACAAGGAAGGCAAGAAGCGTCTGGCCGAGATCGTGGTCCGGC  
TTCAACGACCTGATTGAAGAAGCCGACGCTGCCGCCGCTGCACTGGCCGCTGCCGGCCCGGTTCG  
CCGTGGACGAAGACGCGGTTCGATGAAGATGACGACGAAGACGCGGACGACGACGCTGCCGAG  
GAAGAAGCCGGCCCGACCGGTCCGGACCCGGTGGAAAGTTGCCACGCGCATGGAGAACCTCGCC  
AACGAATACGCCAAGTTCAAGAAGATCTACGCCAAGAACGGCGCCGAGCACAAGCTGGTGGT  
AAGGCGCGGAAGACATGGCCGCCATCTTACCACGCTCAAGCTGCCGCTGCCGCTGACCGAT  
GCGCTGGTACCCAGTGGCTGGCGTGGTCAACGGCATCAAGGATCAGAGCGCAAGGTACTG  
CACCTGGCCACCACCGTGGCACGCATGCCGCGCAAGGACTTCATCCGCTCTGGGAAGGCAAC  
CAGACCAACCTGGAATGGGTGGAAGACGCACTCAAGCGCAAGCAGAAGTGGTCGTCCGGCGCT  
GCGCGACGTCAAGGACCAGATCGTCTCCGAGCAGCAGGGTTCGATCGAGATGGAAAAGGCCA  
ACTACCTGACCCTGGCGAGATCAAGGAGATCAGCCGTGCGATGGCCTATGGC

>race 2

ATGCGCGAAATGGGCACGGTTCGAGCTGCTGACCCGCGAAGGCGAAATCGCCATCGCCAAGCGT  
ATCGAAGAGGGCCTGAGCCAGGTCCAGGCCGCACTGGGTACGTCCCCGCTGTCGACCGAGCTG  
CTGCTGTCCGATTACGAAGCGCACAAGGAAGGCAAGAAGCGCCTGGCCGAGATCGTGGTCCGGC  
TTCAACGACCTGATCGAAGAAGCCGACGCTGCCGCTGCAGCGCTGGCCGCTGCCGGCCCGGTTC  
GCCGTTGACGAAGATGCGGTGGACGAAGACGACGAGCAGGACGCGGATGACGACGCTGCCGA  
GGAAGAAGCCGGCCCGACCGGTCCGGACCCGGTGGAAAGTTGCCACGCGCATGGAGAACCTGG  
CCAACGAGTACGCCAAGTTCAAGAAGGCCTACGTCAAGTATGGCGCCGAGCACAAGAATGTGG  
CCAAGGCGCGGAAGACATGGCCGCCATCTTACCACACTCAAGCTGCCGCTGCCGCTGACCG  
ATGCGCTGGTACCCAGTTGCGTGGCGTGGTCAACGGCATCAAGGACCACGAGCGCAAGGTGC  
TGCACCTGGCGACCACCGTGGCGCGCATGCCGCGCAAGGACTTCATCCGTTCTGTGGGAAGGCA  
ACCAGACCAACCTGGAATGGGTGGAAGACGCACTCAAGCGCAAGCAGAAGTGGTCGTCCGGCG  
CTGCGCGACGTCAAGGACCAGATCGTCTCCGAGCAGCAGGGTTCGATCGAGATGGAAAAGGCC  
AACTACCTCACCTGGCCGAGATCAAGGACATCAGCCGTGCGATGGCCTACGGC

>race 3

ATGCGCGAAATGGGCACGGTTCGAGCTGCTGACCCGCGAAGGCGAAATCGCCATCGCCAAGCGT  
ATCGAAGAGGGCCTGAGCCAGGTCCAGGCCGCACTGGGTACGTCCCCGCTGTCGACCGAGCTG  
CTGCTGTCCGATTACGAAGCGCACAAGGAAGGCAAGAAGCGCCTGGCCGAGATCGTGGTCCGGC  
TTCAACGACCTGATCGAAGAAGCCGACGCTGCCGCTGCAGCGCTGGCCGCTGCCGGCCCGGTTC  
GCCGTTGACGAAGATGCGGTGGACGAAGACGACGAGCAGGACGCGGATGACGACGCTGCCGA

GGAAGAAGCCGGCCCCGACCGGTCCGGACCCGGTGGAAGTTGCCACGCGCATGGAGAACCTGG  
CCAACGAGTACGCCAAGTTCAAGAAGGCCTACGTCAAGTATGGCGCCGAGCACAAGAATGTGG  
CCAAGGCGCGGAAGACATGGCCGCCATCTTACCACACTCAAGCTGCCGCTGCCGCTGACCG  
ATGCGCTGGTACCCAGTTGCGTGGCGTGGTCAACGGCATCAAGGACCAGAGCGCAAGGTGC  
TGCACCTGGCGACCACCGTGGCGCGCATGCCGCGCAAGGACTTCATCCGTTCTGTGGGAAGGCA  
ACCAGACCAACCTGGAATGGGTGGAAGACGCACTCAAGCGCAAGCAGAAGTGGTTCGTCGGCG  
CTGCGCGACGTCAAGGACCAGATCGTCTCCGAGCAGCAGGGTTCGATCGAGATGGAAAAGGCG  
AACTACCTCACCTGGCCGAGATCAAGGACATCAGCCGTGCGATGGCCTACGGC

>race 4

ATGCGCGAAATGGGCACGGTTCGAGCTGCTGACCCGCGAAGGCGAAATCGCCATCGCCAAGCGT  
ATCGAAGAGGGCCTGAGCCAGGTCCAGGCCGCACTGGGTACGTTCCCGCTGTCGACCGAGCTG  
CTGCTGTCCGATTACGAAGCGCACAAGGAAGGCAAGAAGCGCCTGGCCGAGATCGTGGTTCGGC  
TTCAACGACCTGATCGAAGAAGCCGACGCTGCCGCTGCAGCGCTGGCCGCTGCCGGCCCCGGTC  
GCCGTTGACGAAGATGCGGTGGACGAAGACGCAAGACGCGGATGACGACGCTGCCGA  
GGAAGAAGCCGGCCCCGACCGGTCCGGACCCGGTGGAAGTTGCCACGCGCATGGAGAACCTGG  
CCAACGAGTACGCCAAGTTCAAGAAGGCCTACGTCAAGTATGGCGCCGAGCACAAGAATGTGG  
CCAAGGCGCGGAAGACATGGCCGCCATCTTACCACACTCAAGCTGCCGCTGCCGCTGACCG  
ATGCGCTGGTACCCAGTTGCGTGGCGTGGTCAACGGCATCAAGGACCAGAGCGCAAGGTGC  
TGCACCTGGCGACCACCGTGGCGCGCATGCCGCGCAAGGACTTCATCCGTTCTGTGGGAAGGCA  
ACCAGACCAACCTGGAATGGGTGGAAGACGCACTCAAGCGCAAGCAGAAGTGGTTCGTCGGCG  
CTGCGCGACGTCAAGGACCAGATCGTCTCCGAGCAGCAGGGTTCGATCGAGATGGAAAAGGCG  
AACTACCTCACCTGGCCGAGATCAAGGACATCAGCCGTGCGATGGCCTACGGC

>race 5

ATGCGCGAAATGGGCACGGTTGAGCTGCTGACCCGCGAAGGCGAAATCGCCATCGCCAAGCGC  
ATCGAAGAAGGTCTGAGCCAGGTCCAGGCAGCACTGGGCGTGTCCCGCTGTCGACCGAGCTG  
CTGCTGGCCGATTACGAAGCGCACAAGGAAGGCAAGAAGCGTCTGGCCGAGATCGTGGTTCGGC  
TTCAACGACCTGATTGAAGAAGCCGACGCTGCCGCCGCTGCACTGGCCGCTGCCGGCCCCGGTCG  
CCGTGGACGAAGACGCGGTTCGATGAAGATGACGACGAAGACGCGGACGACGACGCTGCCGAG  
GAAGAAGCCGGCCCCGACCGGTCCGGACCCGGTGGAAGTTGCCACGCGCATGGAGAACCTCGCC  
AACGAATACGCCAAGTTCAAGAAGATCTACGCCAAGAACGGCGCCGAGCACAAGCTGGTGGTTC  
AAGGCGCGGAAGACATGGCCGCCATCTTACCACGCTCAAGCTGCCGCTGCCGCTGACCGAT  
GCGCTGGTACCCAGCTGCGTGGCGTGGTCAACGGCATCAAGGATCACGAGCGCAAGGTACTG  
CACCTGGCCACCACCGTGGCACGATGCCGCGCAAGGACTTCATCCGCTCTGTGGGAAGGCAAC  
CAGACCAACCTGGAATGGGTGGAAGACGCACTCAAGCGCAAGCAGAAGTGGTTCGTCGGCGCT  
GCGCGACGTCAAGGACCAGATCGTCTCCGAGCAGCAGGGCTCGATCGAGATGGAAAAGGCCA  
ACTACCTGACCCTGGGCGAGATCAAGGAGATCAGCCGTGCGATGGCCTATGGC

>race 6

ATGCGCGAAATGGGCACGGTTGAGCTGCTGACCCGCGAAGGCGAAATCGCCATCGCCAAGCGC  
ATCGAAGAAGGTCTGAGCCAGGTCCAGGCAGCACTGGGCGTGTCCCGCTGTCGACCGAAATG  
CTGCTGGCCGATTACGAAGCGCACAAGGAAGGCAAGAAGCGTCTGGCCGAGATCGTGGTTCGGC  
TTCAACGACCTGATTGAAGAAGCCGACGCTGCCGCCGCTGCACTGGCCGCTGCCGGCCCCGGTCG  
CCGTGGACGAAGACGCGGTTCGATGAAGATGACGACGAAGACGCGGACGACGACGCTGCCGAG  
GAAGAGGCCGGCCCCGACCGGTCCGGACCCGGTGGAAGTTGGCCACGCGCATGGAGAACCTCGC  
CAACGAATACGCCAAGTTCAAGAAGATCTACGCCAAGAACGGCGCCGAGCACAAGCTGGTGGT

CAAGGCGCGGAAGACATGGCCGCCATCTTACCACGCTCAAGCTGCCGCTGCCGCTGACCGAT  
GCGCTGGTCACCCAGCTGCGTGGCGTGGTCAACGGCATCAAGGATCACGAGCGCAAGGTACTG  
CACCTGGCCACCACCGTGGCACGCATGCCGCGCAAGGACTTCATCCGCTCCTGGGAAGGCAAC  
CAGACCAACCTGGAATGGGTGGAAGACGCACTCAAGCGCAAGCAGAAGTGGTCGTCGGCGCT  
GCGCGACGTCAAGGACCAGATCGTCTCCGAGCAGCAGGGCTCGATCGAGATGGAAAAGGCCA  
ACTACCTGACCCTGGGCGAGATCAAGGAGATCAGCCGTGCGATGGCCTATGGC

>race 9

ATGCGCGAAATGGGCACGGTTCGAGCTGCTGACCCGCGAAGGCGAAATCGCCATCGCCAAGCGT  
ATCGAAGAGGGCCTGAGCCAGGTCCAGGCCGCACTGGGTACGTTCCCGCTGTCGACCGAGCTG  
CTGCTGTCCGATTACGAAGCGCACAAGGAAGGCAAGAAGCGCCTGGCCGAGATCGTGGTCGGC  
TTCAACGACCTGATCGAAGAAGCCGACGCTGCCGCTGCAGCGCTGGCCGCTGCCGGCCCGGTC  
GCCGTTGACGAAGATGCGGTGGACGAAGACGCAGACGAAGACGGCGATGACGACGCTGCCGA  
GGAAGAAGCCGGCCCGACCGGTCCGGACCCGGTGGAAAGTTGCCACGCGCATGGAGAACCTGG  
CCAACGAGTACGCCAAGTTCAAGAAGGCCTACGTCAAGTATGGCGCCGAGCACAGAATGTGG  
CCAAGGCGCGGAAGACATGGCCGCCATCTTACCACACTCAAGCTGCCGCTGCCGCTGACCG  
ATGCGCTGGTCACCCAGTTGCGTGGCGTGGTCAACGGCATCAAGGACCACGAGCGCAAGGTGC  
TGCACCTGGCGACCACCGTGGCGCGCATGCCGCGCAAGGACTTCATCCGTTGTCGTTGGGAAGGCA  
ACCAGACCAACCTGGAATGGGTGGAAGACGCACTCAAGCGCAAGCAGAAGTGGTCGTCGGCG  
CTGCGCGACGTCAAGGACCAGATCGTCTCCGAGCAGCAGGGTTCGATCGAGATGGAAAAGGCG  
AACTACCTCACCTGGCCGAGATCAAGGACATCAGCCGTGCGATGGCCTACGGC

**Supplementary Fig. 2.** Sequence information about 4 housekeeping genes of 50 *Xanthomonas campestris* pv. *campestris* strains.
